# Supplementary material for: Copper-catalyzed asymmetric tandem borylative addition and aldol cyclization
Source: Royal Society of Chemistry journal article supplement (doi:10.1039/d0qo00654h), 2020-01-01

# Supporting Information

## Enantioselective Synthesis of Multi-Substituted Indane Derivatives via Copper-Catalyzed Cascade Reaction

Bing Liu,<sup>a</sup> Haile Qiu,<sup>b</sup> Xiaofeng Chen,<sup>b</sup> Yuanyuan Liu,<sup>b</sup> Wenbo Li<sup>\*b</sup> and Junliang Zhang<sup>\*c</sup>

<sup>a</sup>National Doping Test Laboratory Shanghai, Shanghai University of Sport, shanghai, 200438, China

<sup>b</sup>Shanghai Key Laboratory of Green Chemistry and Chemical Processes, School of Chemistry and Molecular Engineering, East China Normal University, 3663 N. Zhongshan Road, Shanghai 200062, P. R. China.

<sup>c</sup>Department of Chemistry, Fudan University, 2005 Songhu Road, Shanghai 200438, P. R. China.

[junliangzhang@fudan.edu.cn](mailto:junliangzhang@fudan.edu.cn)

# Table Contents

|                                                             |     |
|-------------------------------------------------------------|-----|
| 1. General Information.....                                 | S3  |
| 2. Table S1 and Table S2 Screening the Ligands.....         | S3  |
| 3. General Procedure for the Synthesis of products 3-9..... | S5  |
| 4. References.....                                          | S30 |
| 5. $^1\text{H}$ , $^{13}\text{C}$ NMR.....                  | S31 |

## 1. General Information

All reactions were carried out under an atmosphere of nitrogen in flame-dried glassware with magnetic stirring.  $^1\text{H}$  NMR spectra,  $^{19}\text{F}$  NMR spectra,  $^{13}\text{C}$  NMR spectra were recorded on a Bruker 300, 400 and 500 MHz spectrometer in  $\text{CDCl}_3$ . All signals are reported in ppm with the internal TMS signal at 0 ppm as a standard. Data for  $^1\text{H}$  NMR spectra are reported as follows: chemical shift (ppm, referenced to TMS; s = singlet, d = doublet, t = triplet, q = quartet, m = multiplet, coupling constant(s) in Hz, integration), coupling constant (Hz), and intergration. Data for  $^{13}\text{C}$  NMR are reported in terms of chemical shift (ppm) relative to residual solvent peak ( $\text{CDCl}_3$ : 77.0 ppm). Reactions were monitored by thin layer chromatography (TLC) using silica gel plates. Flash column chromatography was performed over silica gel (300-400 mesh). Dichloromethane, dichloroethane, toluene were freshly distilled from  $\text{CaH}_2$ ; THF,  $\text{Et}_2\text{O}$ ,  $i\text{Pr}_2\text{O}$  and MTBE were freshly distilled from sodium metal prior to use. The ligands were commercial available. The substrates **1** were synthesized according to the procedure of references.<sup>1</sup>

**Table S1. Screening the Known Ligands<sup>a</sup>**

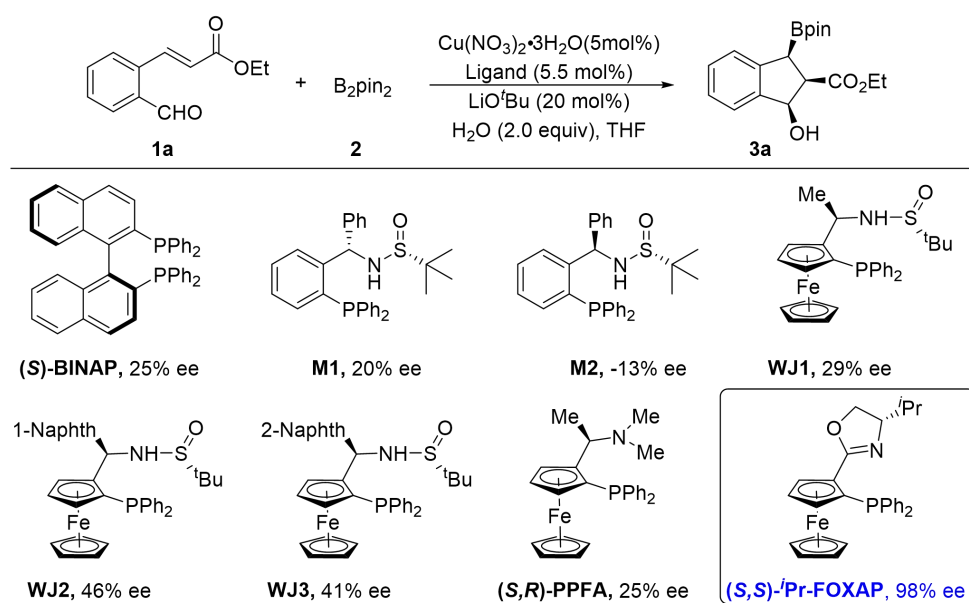

[a] All reactions were carried out with 0.1 mmol of **1a**, 0.15 mmol of **2**, 5 mol% of catalyst ( $[\text{Cu}]$  to Ligand = 1:1.2), 20%  $\text{LiO}^t\text{Bu}$  (1N in THF),  $\text{H}_2\text{O}$  (2.0 equiv) in 1.0 mL THF at rt for 12 h. [b] The ee of the major product were determined by chiral HPLC.

## 2. General Procedure for the Synthesis of products 3-9

### Typical procedure for asymmetric copper-catalyzed boronation cyclization of alkenes with B<sub>2</sub>pin<sub>2</sub>.

The solution of (*S,S*)-*i*-Pr-FOXAP (5.5 mol%) and Cu(NO<sub>3</sub>)<sub>2</sub>·3H<sub>2</sub>O (5 mol%) in THF (3 mL) was stirred at room temperature for 30 mins. Alkene **1** (0.3 mmol) and B<sub>2</sub>pin<sub>2</sub> (0.45 mmol) were then added sequentially. After stirring for further 10 mins, LiO<sup>t</sup>Bu (0.06 mmol) and then H<sub>2</sub>O (0.6 mmol) were added to the reaction mixture. After the alkene **1** was consumed completely determined by TLC analysis, the crude product was then purified by flash column chromatography on silica gel to afford the desired product **3**. The enantiomeric excesses of the products were determined by chiral stationary phase HPLC using a Chiralpak column.

#### 3.1 Synthesis of ethyl (1*R*,2*R*,3*S*)-1-hydroxy-3-(4,4,5,5-tetramethyl-1,3,2-dioxaborolan-2-yl)-2,3-dihydro-1*H*-indene-2-carboxylate (**3a**).

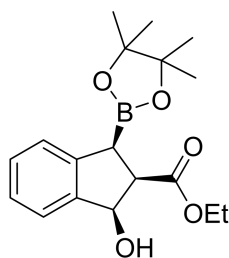

**3a**

The reaction of alkene **1** (40.8 mg, 0.2 mmol) and b<sub>2</sub>pin<sub>2</sub> **2** (76.0 mg, 0.3 mmol), after a flash column chromatography (hexanes: AcOEt = 10:1) afforded the product **3a** as a roopy liquid (41.8 mg, 63% yield) with 98% ee. <sup>1</sup>H NMR (300 MHz, CDCl<sub>3</sub>) δ 7.47 (d, *J* = 6.3 Hz, 1H), 7.28-7.18 (m, 3H), 5.25-5.19 (m, 1H), 4.33-4.21 (m, 2H), 3.98 (d, *J* = 12.2 Hz, 1H), 3.58-3.53 (m, 1H), 2.97 (d, *J* = 8.3 Hz, 1H), 1.34 (t, *J* = 7.1 Hz, 3H), 1.21 (d, *J* = 13.8 Hz, 12H). <sup>13</sup>C NMR (126 MHz, CDCl<sub>3</sub>) δ 172.46, 143.90, 143.12, 129.02, 126.60, 125.59, 123.78, 84.38, 76.03, 61.06, 54.50, 24.60, 24.32, 14.32. ESI-MS calculated for C<sub>18</sub>H<sub>25</sub>BNaO<sub>5</sub>: m/z (%): 355.1691 (M+Na<sup>+</sup>), found: 355.1691. Enantiomeric excess was determined by HPLC with a Chiralpak IC column (hexanes: 2-propanol = 90:10, 0.8 mL/min, 210 nm); minor enantiomer tr = 7.2 min, major

enantiomer tr = 8.1 min.  $[\alpha]_D^{20} = -6.2$  ( $c = 0.17$ ,  $\text{CHCl}_3$ ).

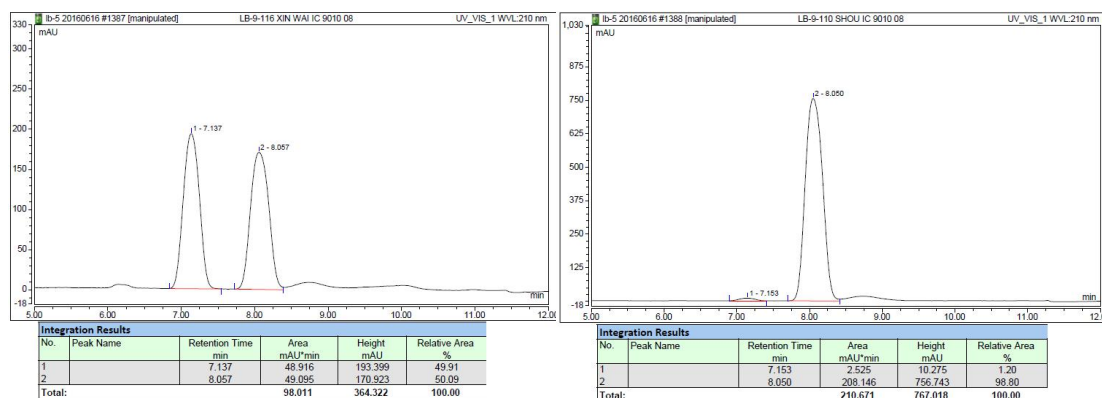

### 3.2 Synthesis of methyl (1*R*,2*R*,3*S*)-1-hydroxy-3-(4,4,5,5-tetramethyl-1,3,2-dioxaborolan-2-yl)-2,3-dihydro-1*H*-indene-2-carboxylate (**3b**).

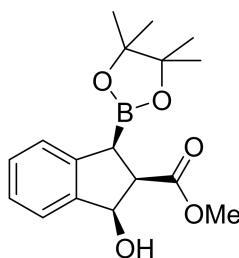

**3b**

The reaction of alkene **1** (57.0 mg, 0.3 mmol) and **2** (114 mg, 0.45 mmol), after a flash column chromatography (hexanes: AcOEt = 10:1) afforded the product **3b** as a ropy liquid (72.5 mg, 76% yield) with 99% ee.  $^1\text{H}$  NMR (300 MHz,  $\text{CDCl}_3$ )  $\delta$  7.47 (d,  $J = 7.4$  Hz, 1H), 7.28-7.18 (m, 3H), 5.23-5.19 (m, 1H), 3.98 (d,  $J = 12.2$  Hz, 1H), 3.81 (s, 3H), 3.60-3.56 (m, 1H), 2.98 (d,  $J = 8.4$  Hz, 1H), 1.21 (d,  $J = 14.0$  Hz, 12H).  $^{13}\text{C}$  NMR (126 MHz,  $\text{CDCl}_3$ )  $\delta$  172.75, 143.72, 142.92, 129.01, 126.60, 125.57, 123.73, 84.37, 75.97, 54.23, 52.09, 24.51, 24.27. ESI-MS calculated for  $\text{C}_{17}\text{H}_{23}\text{BNaO}_5$ :  $m/z$  (%): 341.1534 ( $\text{M}+\text{Na}^+$ ), found: 341.1531. Enantiomeric excess was determined by HPLC with a Chiralpak IC column (hexanes: 2-propanol = 90:10, 0.8 mL/min, 210 nm); minor enantiomer tr = 9.1 min, major enantiomer tr = 10.7 min.  $[\alpha]_D^{20} = -6.3$  ( $c = 0.17$ ,  $\text{HCl}_3$ ).

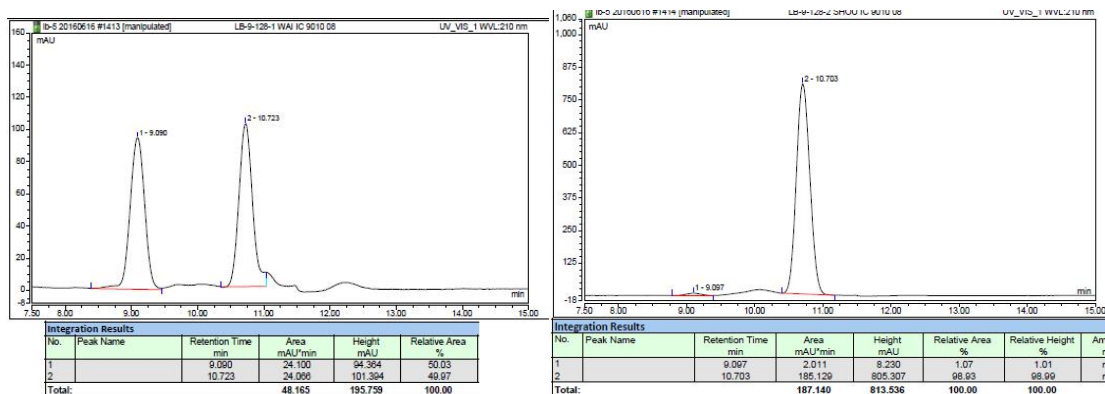

### 3.3 Synthesis of benzyl (1*R*,2*R*,3*S*)-1-hydroxy-3-(4,4,5,5-tetramethyl-1,3,2-dioxaborolan-2-yl)-2,3-dihydro-1*H*-indene-2-carboxylate (**3c**).

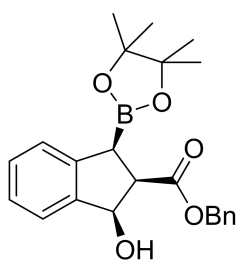

**3c**

The reaction of alkene **1** (80.0 mg, 0.3 mmol) and **2** (114.0 mg, 0.45 mmol), after a flash column chromatography (hexanes: AcOEt = 10:1) afforded the product **3c** as a rosy liquid (78 mg, 66% yield) with 98% ee. <sup>1</sup>H NMR (400 MHz, CDCl<sub>3</sub>) δ 7.39-7.35 (m, 3H), 7.31-7.24 (m, 3H), 7.18-7.10 (m, 3H), 5.20-5.16 (m, 1H), 5.17 (s, 2H), 3.92 (d, *J* = 12.2 Hz, 1H), 3.55-3.52 (m, 1H), 2.91 (d, *J* = 8.2 Hz, 1H), 1.10 (d, *J* = 15.1 Hz, 12H). <sup>13</sup>C NMR (126 MHz, CDCl<sub>3</sub>) δ 172.26, 143.73, 143.02, 135.99, 129.02, 128.44, 128.06, 128.06, 126.62, 125.56, 123.75, 84.41, 76.01, 66.71, 54.41, 24.53, 24.27. ESI-MS calculated for C<sub>23</sub>H<sub>27</sub>BNaO<sub>5</sub>: *m/z* (%): 417.1848 (M+Na<sup>+</sup>), found: 417.1850. Enantiomeric excess was determined by HPLC with a Chiralpak OD-H column (hexanes: 2-propanol = 90:10, 0.8 mL/min, 210 nm); major enantiomer *tr* = 6.6 min, minor enantiomer *tr* = 7.1 min. [ $\alpha$ ]<sub>D</sub><sup>20</sup> = -10.5 (*c* = 0.17, CHCl<sub>3</sub>).

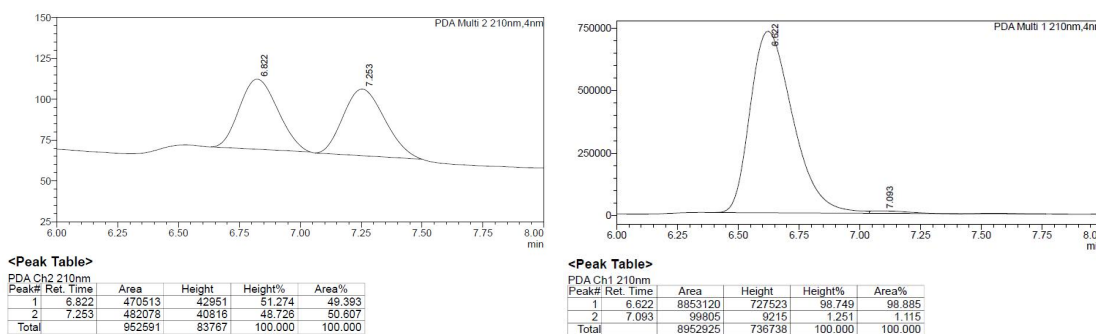

### 3.4 Synthesis of 4-chlorobenzyl (1*R*,2*R*,3*S*)-1-hydroxy-3-(4,4,5,5-tetramethyl-1,3,2-dioxaborolan-2-yl)-2,3-dihydro-1*H*-indene-2-carboxylate (**3d**).

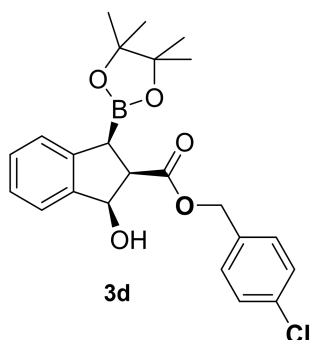

The reaction of alkene **1** (90.0 mg, 0.3 mmol) and **2** (114.0 mg, 0.45 mmol), after a flash column chromatography (hexanes: AcOEt = 10:1) afforded the product **3d** as a rosy liquid (93.7 mg, 73% yield) with 96% ee. <sup>1</sup>H NMR (300 MHz, CDCl<sub>3</sub>) δ 7.45 (d, *J* = 6.6 Hz, 1H), 7.39-7.29 (m, 5H), 7.24-7.17 (m, 3H), 5.27-5.21 (m, 1H), 5.20 (d, *J* = 14.7 Hz, 2H), 3.99 (d, *J* = 12.3 Hz, 1H), 3.63-3.58 (m, 1H), 1.17 (d, *J* = 9.6 Hz, 12H). <sup>13</sup>C NMR (126 MHz, CDCl<sub>3</sub>) δ 172.19, 143.64, 142.91, 134.55, 133.90, 129.43, 129.08, 128.61, 126.67, 125.57, 123.76, 84.45, 76.01, 65.87, 54.36, 24.53, 24.26. ESI-MS calculated for C<sub>23</sub>H<sub>26</sub>BClNaO<sub>5</sub>: *m/z* (%): 451.1458 (M+Na<sup>+</sup>), found: 451.1463. Enantiomeric excess was determined by HPLC with a Chiralpak OD-H column (hexanes: 2-propanol = 90:10, 0.8 mL/min, 210 nm); minor enantiomer *tr* = 7.5 min, major enantiomer *tr* = 8.7 min. [α]<sub>D</sub><sup>20</sup> = -2.6 (*c* = 0.17, CHCl<sub>3</sub>).

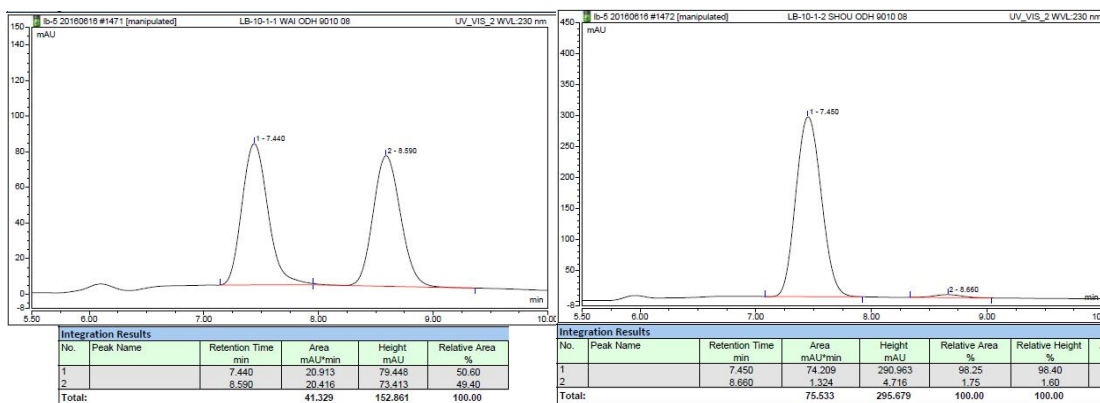

### 3.5 Synthesis of 4-fluorobenzyl (1*R*,2*R*,3*S*)-1-hydroxy-3-(4,4,5,5-tetramethyl-1,3,2-dioxaborolan-2-yl)-2,3-dihydro-1*H*-indene-2-carboxylate (**3e**).

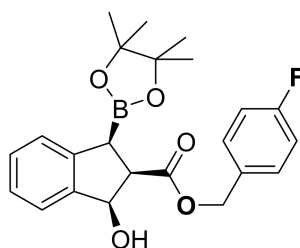

**3e**

The reaction of alkene **1** (81.0 mg, 0.3 mmol) and **2** (114.0 mg, 0.45 mmol), after a flash column chromatography (hexanes: AcOEt = 10:1) afforded the product **3e** as a rosy liquid (77.9 mg, 63% yield) with 97% ee. <sup>1</sup>H NMR (300 MHz, CDCl<sub>3</sub>) δ 7.46-7.39 (m, 3H), 7.28-7.18 (m, 3H), 7.05 (t, *J* = 8.7 Hz, 2H), 5.28-5.15 (m, 1H), 5.21 (d, *J* = 10.7 Hz, 1H), 4.00 (d, *J* = 12.2 Hz, 1H), 3.62-3.57 (m, 1H), 2.98 (d, *J* = 8.2 Hz, 1H), 1.18 (d, *J* = 10.4 Hz, 1H). <sup>19</sup>F NMR (282 MHz, CDCl<sub>3</sub>) δ -108.05--118.44 (m). <sup>13</sup>C NMR (126 MHz, CDCl<sub>3</sub>) δ 172.17, 162.49 (d, *J* = 246.4 Hz), 143.25 (d, *J* = 92.3 Hz), 131.81 (d, *J* = 3.2 Hz), 129.96 (d, *J* = 8.2 Hz), 129.00, 126.60, 125.50, 123.70, 115.35, 115.18, 84.35, 75.95, 65.92, 54.31, 24.47, 24.20. ESI-MS calculated for C<sub>23</sub>H<sub>26</sub>BFNaO<sub>5</sub>: *m/z* (%): 435.1754 (M+Na<sup>+</sup>), found: 435.1767. Enantiomeric excess was determined by HPLC with a Chiralpak OD-H column (hexanes: 2-propanol = 90:10, 0.8 mL/min, 210 nm); minor enantiomer *tr* = 7.9 min, major enantiomer *tr* = 6.9 min. [α]<sub>D</sub><sup>20</sup> = -54.3 (*c* = 0.17, CHCl<sub>3</sub>).



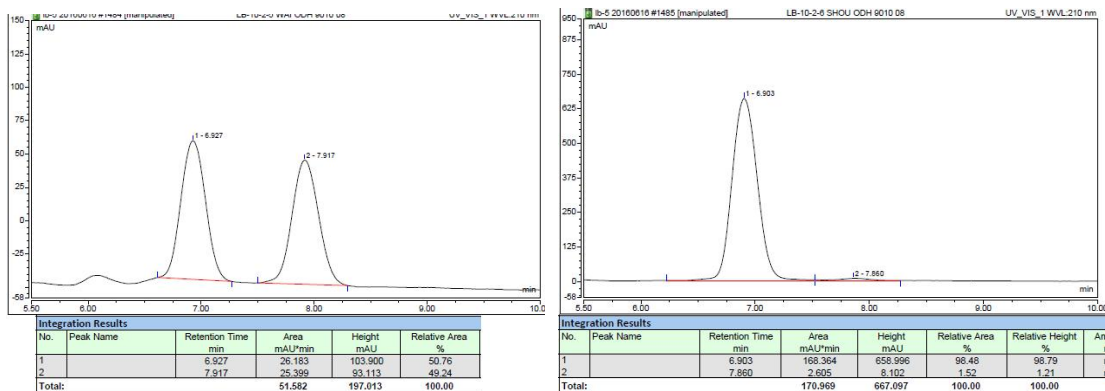

### 3.6 Synthesis of 4-(trifluoromethyl)benzyl (1*R*,2*R*,3*S*)-1-hydroxy-3-(4,4,5,5-tetramethyl-1,3,2-dioxaborolan-2-yl)-2,3-dihydro-1*H*-indene-2-carboxylate (**3f**).

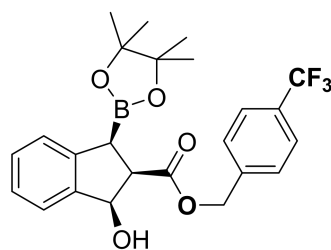

**3f**

The reaction of alkene **1** (100.2 mg, 0.3 mmol) and **2** (114.0 mg, 0.45 mmol), after a flash column chromatography (hexanes: AcOEt = 10:1) afforded the product **3f** as a rosy liquid (85.9 mg, 62% yield) with 97% ee. <sup>1</sup>H NMR (400 MHz, CDCl<sub>3</sub>) δ 7.54-7.45 (m, 4H), 7.36 (d, *J* = 7.2 Hz, 1H), 7.18-7.08 (m, 3H), 5.27 (d, *J* = 13.1 Hz, 1H), 5.18 (d, *J* = 6.0 Hz, 2H), 5.13 (d, *J* = 13.1 Hz, 1H), 3.56-3.52 (m, 1H), 2.90 (d, *J* = 8.3 Hz, 1H), 1.06 (d, *J* = 9.3 Hz, 12H). <sup>19</sup>F NMR (282 MHz, CDCl<sub>3</sub>) δ -62.59. <sup>13</sup>C NMR (126 MHz, CDCl<sub>3</sub>) δ 172.13, 143.55, 142.84, 140.09, 130.11 (q, *J*<sub>C-F</sub> = 32.6 Hz), 129.10, 127.93, 127.93, 126.69, 125.55, 125.34 (q, *J* = 3.7 Hz), 123.75, 84.44, 76.00, 65.69, 54.28, 24.46, 24.20. ESI-MS calculated for C<sub>24</sub>H<sub>26</sub>BF<sub>3</sub>NaO<sub>5</sub>: *m/z* (%): 485.1722 (M+Na<sup>+</sup>), found: 485.1721. Enantiomeric excess was determined by HPLC with a Chiralpak OD-H column (hexanes: 2-propanol = 90:10, 0.8 mL/min, 210 nm); minor enantiomer *tr* = 7.6 min, major enantiomer *tr* = 8.6 min. [α]<sub>D</sub><sup>20</sup> = -12.3 (*c* = 0.17, CHCl<sub>3</sub>).

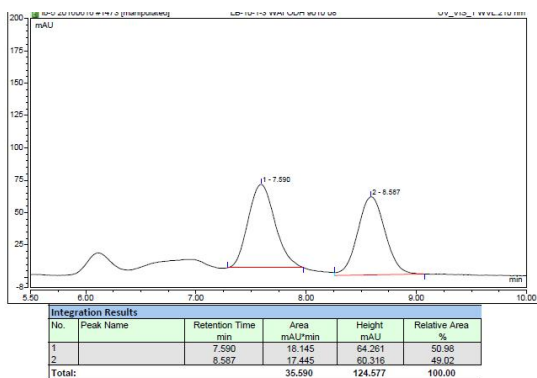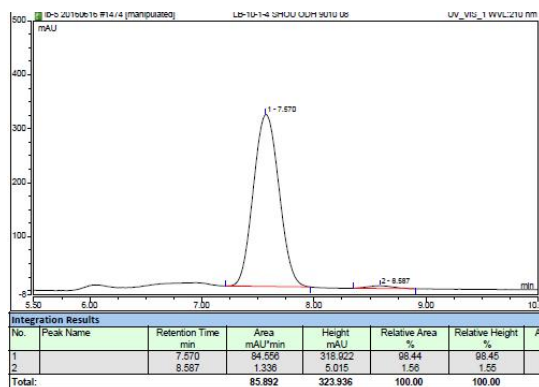

### 3.7 Synthesis of 3,5-bis(trifluoromethyl)benzyl (1*R*,2*R*,3*S*)-1-hydroxy-3-(4,4,5,5-tetramethyl-1,3,2-dioxaborolan-2-yl)-2,3-dihydro-1*H*-indene-2-carboxylate (**3g**).

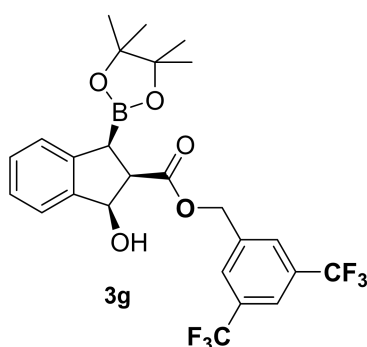

The reaction of alkene **1** (80.4 mg, 0.2 mmol) and **2** (76.0 mg, 0.3 mmol), after a flash column chromatography (hexanes: AcOEt = 10:1) afforded the product **3g** as a ropy liquid (68.9 mg, 65% yield) with 90% ee. <sup>1</sup>H NMR (300 MHz, CDCl<sub>3</sub>) δ 7.93 (s, 2H), 7.82 (s, 1H), 7.48 (d, *J* = 6.6 Hz, 1H), 7.42-6.98 (m, 3H), 5.29 (m, 2H), 5.23 (d, *J* = 13.3 Hz, 1H), 3.97 (d, *J* = 12.3 Hz, 1H), 3.66 (m, 1H), 3.00 (d, *J* = 8.2 Hz, 1H), 1.13 (s, 12H). <sup>19</sup>F NMR (282 MHz, CDCl<sub>3</sub>) δ -62.83. <sup>13</sup>C NMR (126 MHz, CDCl<sub>3</sub>) δ 172.18, 143.44, 142.73, 138.87, 131.76 (q, *J*<sub>C-F</sub> = 33.4 Hz), 129.19, 127.78, 126.75, 125.67, 123.76, 121.82, 84.49, 76.04, 64.95, 54.20, 24.41, 24.14. ESI-MS calculated for C<sub>25</sub>H<sub>25</sub>BF<sub>6</sub>NaO<sub>5</sub>: *m/z* (%): 553.1596 (M+Na<sup>+</sup>), found: 553.1599. Enantiomeric excess was determined by HPLC with a Chiralpak IE column (hexanes: 2-propanol = 90:10, 0.5 mL/min, 210 nm); minor enantiomer *tr* = 8.7 min, major enantiomer *tr* = 9.8 min. [ $\alpha$ ]<sub>D</sub><sup>20</sup> = -8.8 (*c* = 0.17, CHCl<sub>3</sub>).

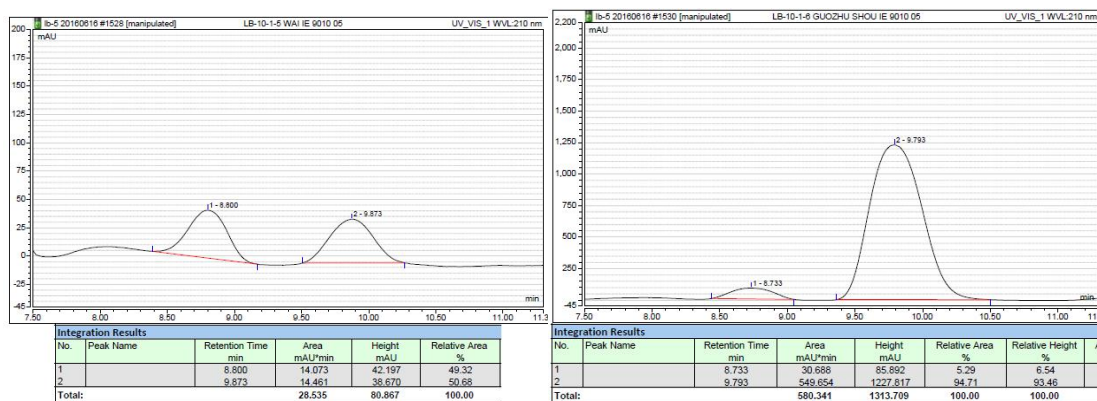

### 3.8 Synthesis of 4-fluorophenyl (1*R*,2*R*,3*S*)-1-hydroxy-3-(4,4,5,5-tetramethyl-1,3,2-dioxaborolan-2-yl)-2,3-dihydro-1*H*-indene-2-carboxylate (**3h**).

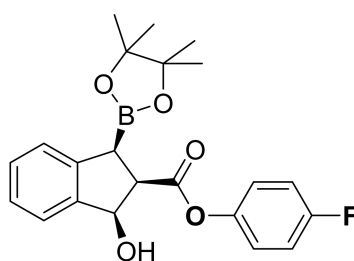

**3h**

The reaction of alkene **1** (81.0 mg, 0.3 mmol) and **2** (114.0 mg, 0.45 mmol), after a flash column chromatography (hexanes: AcOEt = 10:1) afforded the product **3h** as a roppy liquid (72.8 mg, 61% yield) with 96% ee. <sup>1</sup>H NMR (300 MHz, CDCl<sub>3</sub>) δ 7.50 (d, *J* = 6.2 Hz, 1H), 7.28-7.20 (m, 3H), 7.17-7.12 (m, 2H), 7.09-7.03 (m, 2H), 5.41-5.35 (m, 1H), 4.10 (d, *J* = 12.3 Hz, 1H), 3.83-3.78 (m, 1H), 3.05 (d, *J* = 8.1 Hz, 1H), 1.15 (d, *J* = 14.7 Hz, 12H). <sup>19</sup>F NMR (282 MHz, CDCl<sub>3</sub>) δ -110.36--124.58 (m). <sup>13</sup>C NMR (126 MHz, CDCl<sub>3</sub>) δ 171.17, 160.23 (d, *J* = 243.8 Hz), 146.82 (d, *J* = 2.8 Hz), 143.17 (d, *J* = 121.1 Hz), 129.22, 126.79, 125.68, 123.81, 123.10 (d, *J* = 8.5 Hz), 116.07, 115.88, 84.54, 76.32, 54.31, 24.58, 24.27. ESI-MS calculated for C<sub>22</sub>H<sub>24</sub>BFNaO<sub>5</sub>: *m/z* (%): 421.1597 (M+Na<sup>+</sup>), found: 421.1605. Enantiomeric excess was determined by HPLC with a Chiralpak AS-H column (hexanes: 2-propanol = 90:10, 0.8 mL/min, 210 nm); minor enantiomer *tr* = 6.8 min, major enantiomer *tr* = 6.5 min. [α]<sub>D</sub><sup>20</sup> = -54.3 (*c* = 0.17, CHCl<sub>3</sub>).

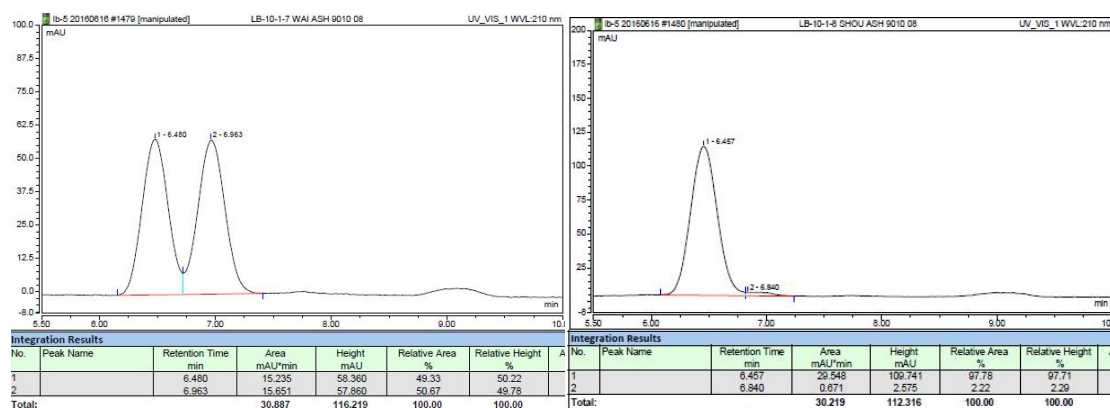

### 3.9 Synthesis of ethyl (1*S*,2*R*,3*R*)-5-fluoro-3-hydroxy-1-(4,4,5,5-tetramethyl-1,3,2-dioxaborolan-2-yl)-2,3-dihydro-1*H*-indene-2-carboxylate (**3i**).

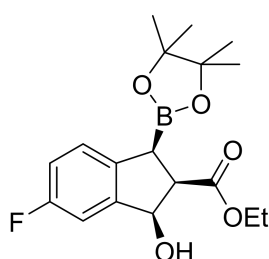

**3i**

The reaction of alkene **1** (66.6 mg, 0.3 mmol) and **2** (114.0 mg, 0.45 mmol), after a flash column chromatography (hexanes: AcOEt = 10:1) afforded the product **3i** as a rosy liquid (72.5 mg, 69% yield) with 84% ee. <sup>1</sup>H NMR (300 MHz, CDCl<sub>3</sub>) δ 7.13-7.08 (m, 2H), 6.96-6.89 (m, 1H), 5.18-5.12 (m, 1H), 4.23 (q, *J* = 69.58 Hz, 2H), 4.02 (d, *J* = 12.2 Hz, 1H), 3.58-3.53 (m, 1H), 2.89 (d, *J* = 8.3 Hz, 1H), 1.31 (t, *J* = 7.1 Hz, 3H), 1.18 (d, *J* = 11.7 Hz, 12H). <sup>19</sup>F NMR (282 MHz, CDCl<sub>3</sub>) δ -116.33 (td, *J* = 8.5, 4.9 Hz). <sup>13</sup>C NMR (126 MHz, CDCl<sub>3</sub>) δ 172.05, 161.76 (d, *J* = 243.9 Hz), 144.83 (d, *J* = 7.3 Hz), 139.14 (d, *J* = 2.5 Hz), 124.69 (d, *J* = 8.4 Hz), 116.00 (d, *J* = 22.6 Hz), 112.45 (d, *J* = 22.0 Hz), 84.41, 75.70, 75.69, 61.07, 54.80, 24.52, 24.26, 14.23. ESI-MS calculated for C<sub>18</sub>H<sub>24</sub>BFNaO<sub>5</sub>: *m/z* (%): 373.1596 (M+Na<sup>+</sup>), found: 373.1586. Enantiomeric excess was determined by HPLC with a Chiralpak OD-H column (hexanes: 2-propanol = 90:10, 0.5 mL/min, 275 nm); minor enantiomer *tr* = 8.8 min, major enantiomer *tr* = 10.2 min. [α]<sub>D</sub><sup>20</sup> = -5.4 (*c* = 0.17, CHCl<sub>3</sub>).

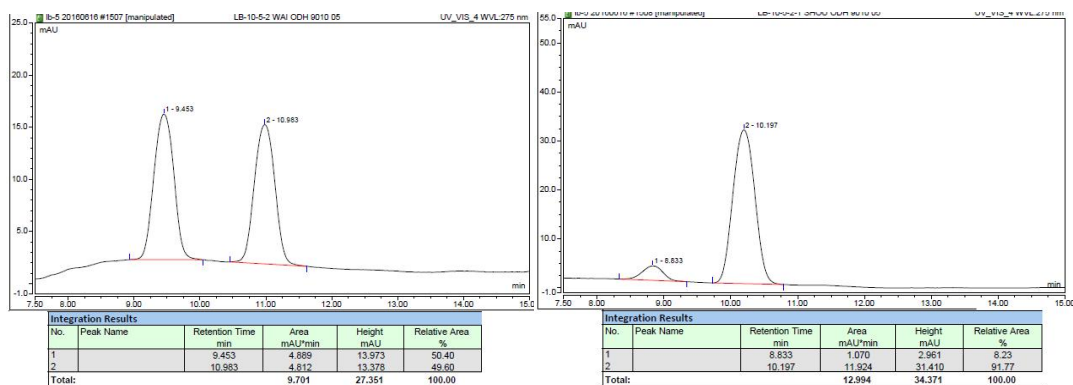

### 3.10 Synthesis of ethyl (1*R*,2*R*,3*S*)-5-fluoro-1-hydroxy-3-(4,4,5,5-tetramethyl-1,3,2-dioxaborolan-2-yl)-2,3-dihydro-1*H*-indene-2-carboxylate (**3j**).

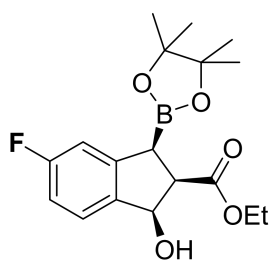

**3j**

The reaction of alkene **1** (66.6 mg, 0.3 mmol) and **2** (114.0 mg, 0.45 mmol), after a flash column chromatography (hexanes: AcOEt = 10:1) afforded the product **3j** as a rosy liquid (69.3 mg, 66% yield) with 91% ee. <sup>1</sup>H NMR (400 MHz, CDCl<sub>3</sub>) δ 7.40-7.37 (m, 1H), 6.87 (t, *J* = 9.5 Hz, 2H), 5.17-5.13 (m, 1H), 4.26-4.22 (m, 2H), 3.91 (d, *J* = 12.0 Hz, 1H), 3.55 (t, *J* = 7.1 Hz, 1H), 2.92 (d, *J* = 8.1 Hz, 1H), 1.31 (t, *J* = 2.0 Hz, 3H), 1.19 (d, *J* = 15.7 Hz, 12H). <sup>19</sup>F NMR (282 MHz, CDCl<sub>3</sub>) δ -113.17. <sup>13</sup>C NMR (126 MHz, CDCl<sub>3</sub>) δ 172.15, 163.49 (d, *J* = 246.3 Hz), 146.44, 138.87, 126.86 (d, *J* = 9.0 Hz), 113.67 (d, *J* = 22.4 Hz), 110.63 (d, *J* = 22.7 Hz), 84.51, 75.16, 61.13, 54.89, 24.58, 24.32, 14.25. ESI-MS calculated for C<sub>18</sub>H<sub>24</sub>BFNaO<sub>5</sub>: *m/z* (%): 373.1596 (M+Na<sup>+</sup>), found: 373.1601. Enantiomeric excess was determined by HPLC with a Chiralpak OD-H column (hexanes: 2-propanol = 9505, 0.8 mL/min, 275 nm); minor enantiomer *tr* = 10.7 min, major enantiomer *tr* = 9.8 min. [α]<sub>D</sub><sup>20</sup> = -0.8 (*c* = 0.17, CHCl<sub>3</sub>).

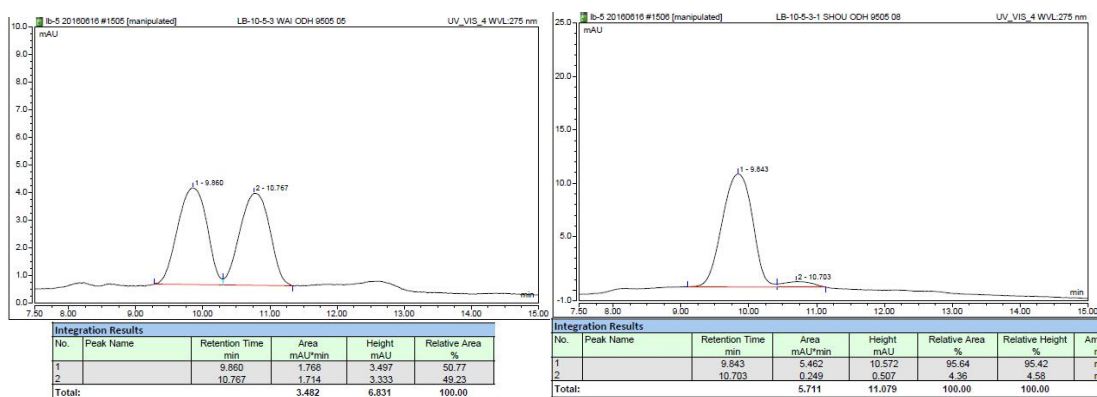

### 3.11 Synthesis of 1-((1*R*,2*R*,3*S*)-1-hydroxy-3-(4,4,5,5-tetramethyl-1,3,2-dioxaborolan-2-yl)-2,3-dihydro-1*H*-inden-2-yl)ethan-1-one (**3k**).

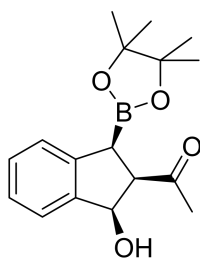

**3k**

The reaction of alkene **1** (52.2 mg, 0.3 mmol) and **2** (114.0 mg, 0.3 mmol), after a flash column chromatography (hexanes: AcOEt = 10:1) afforded the product **3k** as a white solid (75.2 mg, 83% yield) with 99% *ee*. M.p. = 77-78 °C. <sup>1</sup>H NMR (300 MHz, CDCl<sub>3</sub>) δ 7.47 (d, *J* = 7.5 Hz, 1H), 7.28-7.18 (m, 3H), 5.39-5.33 (m, 1H), 3.96 (d, *J* = 12.4 Hz, 1H), 3.70-3.65 (m, 1H), 2.81 (d, *J* = 8.0 Hz, 1H), 2.40 (s, 3H), 1.20 (d, *J* = 10.9 Hz, 12H). <sup>13</sup>C NMR (126 MHz, CDCl<sub>3</sub>) δ 207.70, 144.04, 142.77, 129.06, 126.51, 125.43, 123.86, 84.18, 75.85, 63.65, 27.99, 24.41, 24.29. ESI-MS calculated for C<sub>17</sub>H<sub>23</sub>BNaO<sub>4</sub>: *m/z* (%): 325.1585 (M+Na<sup>+</sup>), found: 325.1588. Enantiomeric excess was determined by HPLC with a Chiralpak IC column (hexanes: 2-propanol = 85:15, 0.8 mL/min, 210 nm); minor enantiomer *tr* = 6.2 min, major enantiomer *tr* = 6.4 min. [ $\alpha$ ]<sub>D</sub><sup>20</sup> = +9.8 (*c* = 0.17, CHCl<sub>3</sub>).

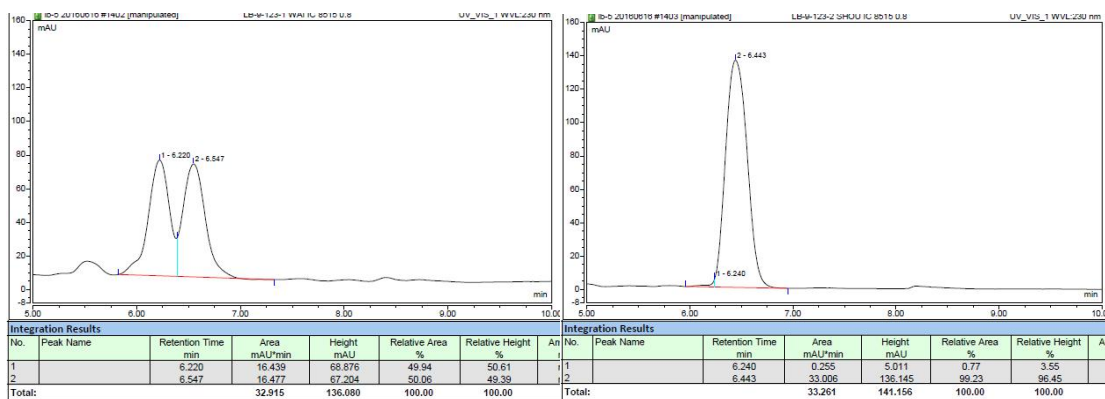

### 3.12 Synthesis of 1-((1*R*,2*R*,3*S*)-1-hydroxy-3-(4,4,5,5-tetramethyl-1,3,2-dioxaborolan-2-yl)-2,3-dihydro-1*H*-inden-2-yl)propan-1-one (**3I**).

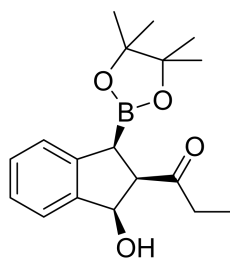

**3I**

The reaction of alkene **1** (56.4 mg, 0.3 mmol) and **2** (114.0 mg, 0.45 mmol), after a flash column chromatography (hexanes: AcOEt = 10:1) afforded the product **3I** as a colorless ropy liquid (67.3 mg, 71% yield) with 99% ee. <sup>1</sup>H NMR (300 MHz, CDCl<sub>3</sub>) δ 7.44 (d, *J* = 7.6 Hz, 1H), 7.26-7.16 (m, 1H), 5.36-5.30 (m, 1H), 3.95 (d, *J* = 12.5 Hz, 1H), 3.68-3.63 (m, 1H), 2.90-2.78 (m, 2H), 2.65-2.54 (m, 1H), 1.18 (d, *J* = 8.4 Hz, 12H), 1.13 (t, *J* = 7.3 Hz, 3H). <sup>13</sup>C NMR (126 MHz, CDCl<sub>3</sub>) δ 210.28, 144.08, 142.93, 129.01, 126.45, 125.41, 123.84, 84.14, 75.93, 62.69, 33.65, 24.53, 24.27, 7.67. ESI-MS calculated for C<sub>18</sub>H<sub>25</sub>BNaO<sub>4</sub>: *m/z* (%): 339.1741 (M+Na<sup>+</sup>), found: 339.1734. Enantiomeric excess was determined by HPLC with a Chiralpak ADH column (hexanes: 2-propanol = 90:10, 0.8 mL/min, 210 nm); minor enantiomer *tr* = 8.5 min, major enantiomer *tr* = 6.5 min. [α]<sub>D</sub><sup>20</sup> = +10.6 (*c* = 0.17, CHCl<sub>3</sub>).

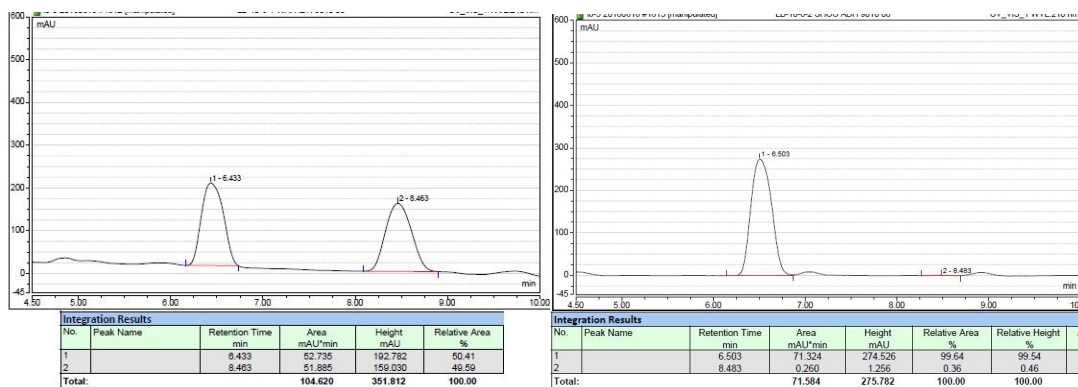

### 3.13 Synthesis of 1-((1*R*,2*R*,3*S*)-1-hydroxy-3-(4,4,5,5-tetramethyl-1,3,2-dioxaborolan-2-yl)-2,3-dihydro-1*H*-inden-2-yl)butan-1-one (**3m**)

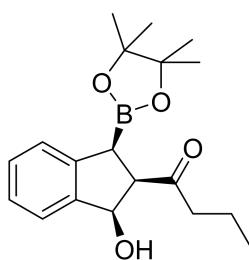

**3m**

The reaction of alkene **1** (60.6 mg, 0.3 mmol) and **2** (114.0 mg, 0.45 mmol), after a flash column chromatography (hexanes: AcOEt = 10:1) afforded the product **3m** as a rosy liquid (72.9 mg, 73% yield) with 96% ee. <sup>1</sup>H NMR (300 MHz, CDCl<sub>3</sub>) δ 7.43 (d, *J* = 7.5 Hz, 1H), 7.26-7.15 (m, 3H), 5.36-5.26 (m, 1H), 3.96 (d, *J* = 12.5 Hz, 1H), 3.65-3.60 (m, 1H), 2.84-2.73 (m, 1H), 2.63-2.52 (m, 1H), 1.75-1.62 (m, 1H), 1.17 (d, *J* = 8.2 Hz, 1H), 0.95 (t, *J* = 7.4 Hz, 1H). <sup>13</sup>C NMR (126 MHz, CDCl<sub>3</sub>) δ 209.80, 144.03, 142.94, 128.96, 126.41, 125.36, 123.79, 84.08, 75.87, 62.88, 42.34, 24.51, 24.21, 17.04, 13.72. ESI-MS calculated for C<sub>19</sub>H<sub>27</sub>BNaO<sub>4</sub>: *m/z* (%): 353.1898 (M+Na<sup>+</sup>), found: 353.1894. Enantiomeric excess was determined by HPLC with a Chiralpak IC column (hexanes: 2-propanol = 90:10, 0.5 mL/min, 210 nm); minor enantiomer *tr* = 8.8 min, major enantiomer *tr* = 9.4 min. [α]<sub>D</sub><sup>20</sup> = +10.9 (*c* = 0.17, CHCl<sub>3</sub>).



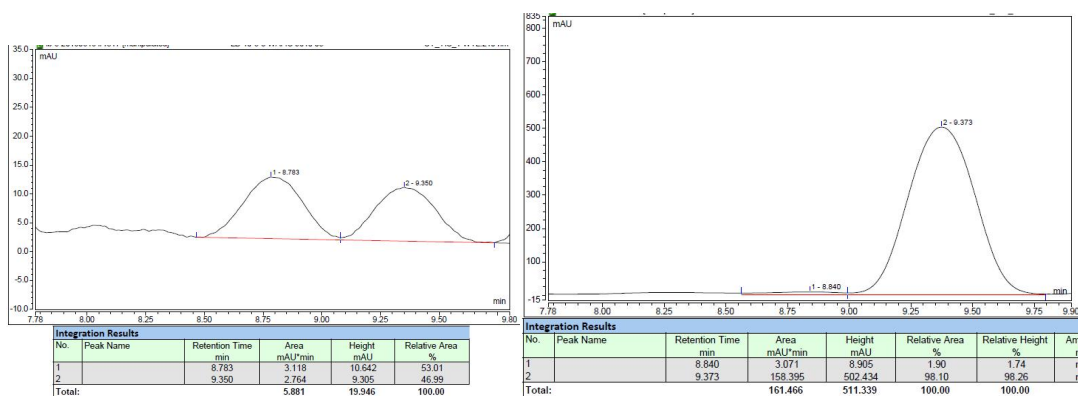

### 3.14 Synthesis of 1-((1*R*,2*R*,3*S*)-1-hydroxy-3-(4,4,5,5-tetramethyl-1,3,2-dioxaborolan-2-yl)-2,3-dihydro-1*H*-inden-2-yl)hexan-1-one (**3n**)

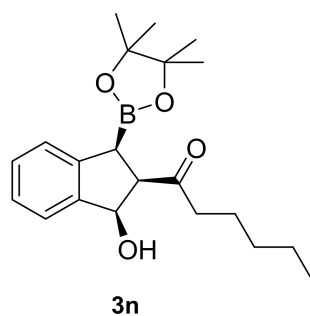

The reaction of alkene **1** (69.0 mg, 0.3 mmol) and **2** (114.0 mg, 0.45 mmol), after a flash column chromatography (hexanes: AcOEt = 10:1) afforded the product **3n** as a rosy liquid (70.0 mg, 65% yield) with 96% ee. <sup>1</sup>H NMR (500 MHz, CDCl<sub>3</sub>) δ 7.42 (d, *J* = 7.3 Hz, 1H), 7.23-7.14 (m, 3H), 5.33-5.29 (m, 1H), 3.95 (d, *J* = 12.4 Hz, 1H), 3.63-3.61 (m, 1H), 2.81-2.74 (m, 2H), 2.61-2.55 (m, 1H), 1.67-1.62 (m, 2H) 1.32-1.30 (m, 4H), 1.17 (d, *J* = 14.3 Hz, 12H), 0.88 (t, *J* = 7.0 Hz, 3H). <sup>13</sup>C NMR (126 MHz, CDCl<sub>3</sub>) δ 209.94, 143.99, 142.88, 128.92, 126.37, 125.33, 123.75, 84.05, 75.84, 62.82, 40.40, 31.35, 24.47, 24.18, 23.26, 22.38, 13.87. ESI-MS calculated for C<sub>21</sub>H<sub>31</sub>BNaO<sub>4</sub>, *m/z* (%): 381.2208, (M+Na<sup>+</sup>), found: 381.2185. Enantiomeric excess was determined by HPLC with a Chiralpak AD-H column (hexanes: 2-propanol = 90:10, 0.8 mL/min, 210 nm); minor enantiomer *tr* = 6.7 min, major enantiomer *tr* = 5.6 min. [ $\alpha$ ]<sub>D</sub><sup>20</sup> = -11.6 (*c* = 0.17, CHCl<sub>3</sub>).

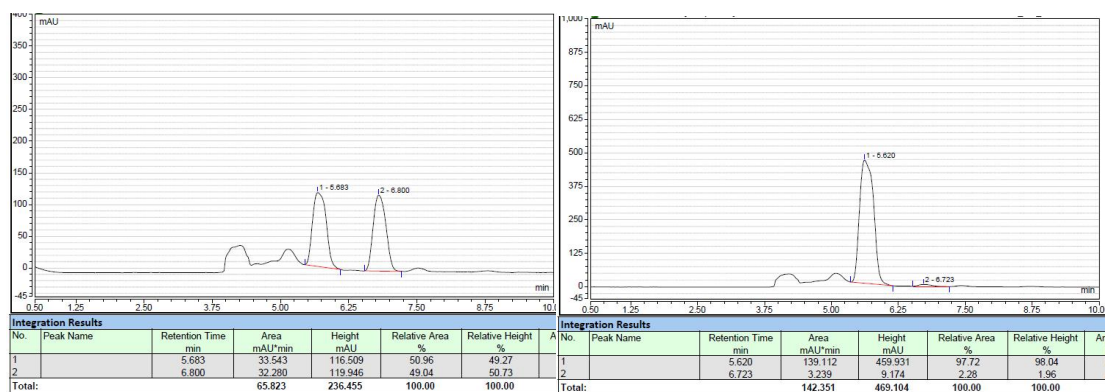

### 3.15 Synthesis of 1-((1*S*,2*R*,3*R*)-3-hydroxy-5-(methoxymethoxy)-1-(4,4,5,5-tetramethyl-1,3,2-dioxaborolan-2-yl)-2,3-dihydro-1*H*-inden-2-yl)propan-1-one (**3o**)

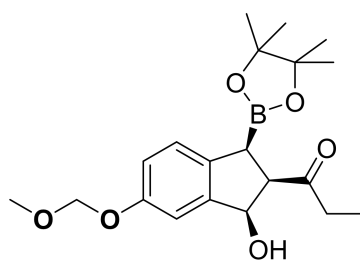

**3o**

The reaction of alkene **1** (74.4 mg, 0.3 mmol) and **2** (114.0 mg, 0.45 mmol), after a flash column chromatography (hexanes: AcOEt = 10:1) afforded the product **3o** (77.8 mg, 69% yield) with 99% ee. <sup>1</sup>H NMR (300 MHz, CDCl<sub>3</sub>) δ 7.09 (dd, *J* = 18.0, 5.3 Hz, 1H), 6.91 (dd, *J* = 8.3, 2.4 Hz, 1H), 5.26 (dd, *J* = 12.4, 6.2 Hz, 1H), 5.14 (dd, *J* = 19.7, 6.7 Hz, 1H), 3.98 (d, *J* = 12.4 Hz, 1H), 3.66-3.62 (m, 1H), 3.47 (s, 3H), 2.87-2.79 (m, 1H), 2.70 (d, *J* = 8.0 Hz, 1H), 2.60-2.52 (m, 1H), 1.18 (d, *J* = 5.2 Hz, 12H), 1.11 (t, *J* = 7.3 Hz, 3H). <sup>13</sup>C NMR (126 MHz, CDCl<sub>3</sub>) δ 210.19, 156.20, 144.17, 137.21, 124.51, 117.63, 113.20, 94.80, 84.13, 75.99, 63.14, 55.93, 33.63, 24.55, 24.27, 7.64. ESI-MS calculated for C<sub>20</sub>H<sub>29</sub>BNaO<sub>6</sub>, *m/z* (%): 399.1949 (M+Na<sup>+</sup>), found: 399.1956. Enantiomeric excess was determined by HPLC with a Chiralpak ADH+ADH column (hexanes: 2-propanol = 90:10, 0.8 mL/min, 254 nm); minor enantiomer *tr* = 22.4 min, major enantiomer *tr* = 19.5 min. [α]<sub>D</sub><sup>20</sup> = -14.0 (*c* = 0.17, CHCl<sub>3</sub>).

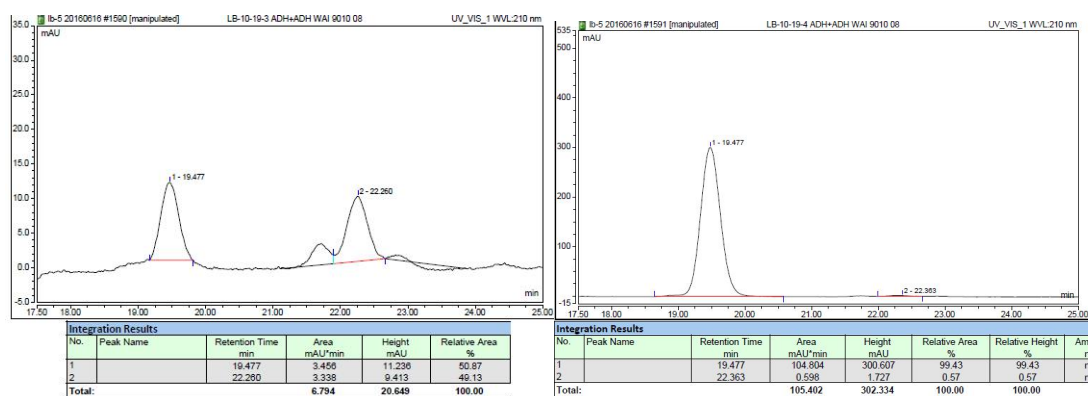

### 3.16 Synthesis of ethyl (1*R*,2*R*,3*S*)-1-hydroxy-1-methyl-3-(4,4,5,5-tetramethyl-1,3,2-dioxaborolan-2-yl)-2,3-dihydro-1*H*-indene-2-carboxylate (**3p**)

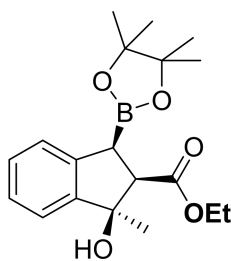

**3p**

The reaction of alkene **1** (65.4 mg, 0.3 mmol) and **2** (114.0 mg, 0.45 mmol), after a flash column chromatography (hexanes: AcOEt = 10:1) afforded the product **3p** as a rosy liquid (67 mg, 65% yield) with 97% ee. <sup>1</sup>H NMR (300 MHz, CDCl<sub>3</sub>) δ 7.35-7.29 (m, 2H), 7.27-7.21 (m, 2H), 4.27-4.19 (m, 2H), 3.24 (q, *J* = 9.9 Hz, 2H), 2.94 (s, 1H), 1.78 (s, 3H), 1.30 (t, *J* = 7.1 Hz, 3H), 1.25 (d, *J* = 4.3 Hz, 12H). <sup>13</sup>C NMR (126 MHz, CDCl<sub>3</sub>) δ 173.11, 145.85, 142.37, 128.80, 126.69, 124.51, 122.82, 83.78, 80.67, 60.71, 56.65, 26.26, 24.98, 24.43, 14.30. ESI-MS calculated for C<sub>19</sub>H<sub>27</sub>BNaO<sub>5</sub>: *m/z* (%): 369.1847 (M+Na<sup>+</sup>), found: 369.1853. Enantiomeric excess was determined by HPLC with a Chiralpak AD-H column (hexanes: 2-propanol = 90:10, 0.8 mL/min, 210 nm); minor enantiomer *tr* = 14.3 min, major enantiomer *tr* = 13.1 min. [α]<sub>D</sub><sup>20</sup> = -15.5 (*c* = 0.17, CHCl<sub>3</sub>).

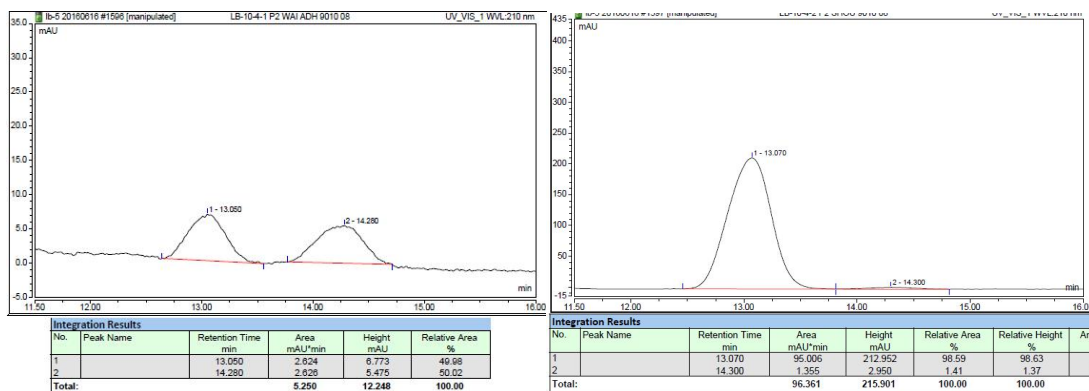

### 3.17 Synthesis of benzyl (1*R*,2*R*,3*S*)-1-hydroxy-1-methyl-3-(4,4,5,5-tetramethyl-1,3,2-dioxaborolan-2-yl)-2,3-dihydro-1*H*-indene-2-carboxylate (**3q**)

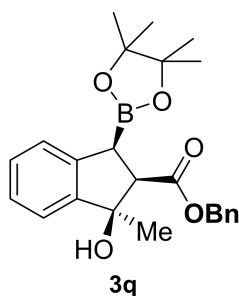

The reaction of alkene **1** (56.0 mg, 0.2 mmol) and **2** (76.0 mg, 0.3 mmol), after a flash column chromatography (hexanes: AcOEt = 10:1) afforded the product **3q** as a white solid (50.6 mg, 62% yield) with 99% ee. <sup>1</sup>H NMR (300 MHz, CDCl<sub>3</sub>) δ 7.46-7.33 (m, 2H), 7.31-7.27 (m, 2H), 5.28 (s, 1H), 3.44-3.32 (m, 2H), 2.92 (s, 1H), 1.86 (s, 3H), 1.23 (d, *J* = 2.4 Hz, 12H). <sup>13</sup>C NMR (126 MHz, CDCl<sub>3</sub>) δ 172.71, 145.73, 142.25, 135.85, 128.80, 128.43, 128.08, 128.08, 126.66, 124.48, 122.79, 83.72, 80.78, 66.42, 56.84, 26.24, 24.83, 24.33. Enantiomeric excess was determined by HPLC with a Chiralpak ADH column (hexanes: 2-propanol = 90:10, 0.8 mL/min, 220 nm); minor enantiomer *tr* = 20.7 min, major enantiomer *tr* = 16.5 min. ESI-MS calculated for C<sub>24</sub>H<sub>29</sub>BNaO<sub>5</sub>: *m/z* (%): 431.2000 (M+Na<sup>+</sup>), found: 431.2008. [α]<sub>D</sub><sup>20</sup> = -14.3 (*c* = 0.17, CHCl<sub>3</sub>).

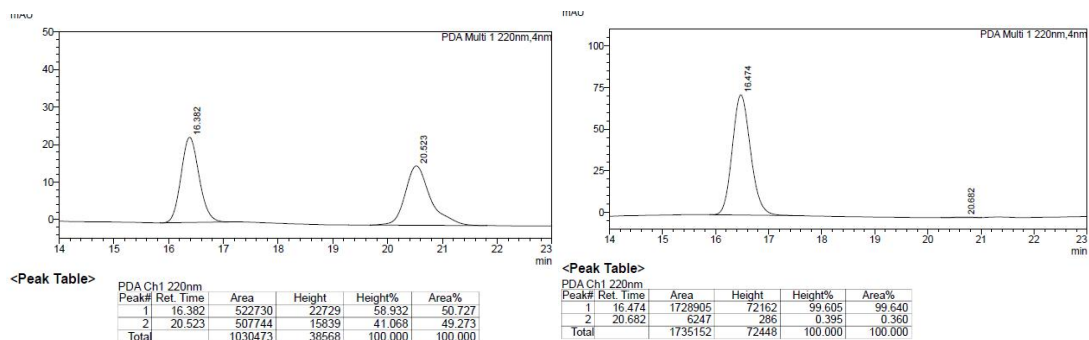

### 3.18 Synthesis of 1-((1*R*,2*R*,3*S*)-1-hydroxy-1-methyl-3-(4,4,5,5-tetramethyl-1,3,2-dioxaborolan-2-yl)-2,3-dihydro-1*H*-inden-2-yl)propan-1-one (**3r**)

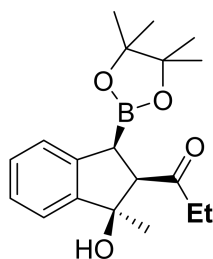

**3r**

The reaction of alkene **1** (60.6 mg, 0.3 mmol) and **2** (114.0 mg, 0.45 mmol), after a flash column chromatography (hexanes: AcOEt = 10:1) afforded the product **3r** as a colorless ropy liquid (74 mg, 75% yield) with 99% ee. <sup>1</sup>H NMR (300 MHz, CDCl<sub>3</sub>) δ 7.35-7.32 (m, 1H), 7.22-7.13 (m, 3H), 4.29 (s, 1H), 3.54 (d, *J* = 8.1 Hz, 1H), 2.86-2.75 (m, 2H), 2.66-2.56 (m, 1H), 1.90 (s, 3H), 1.17 (d, *J* = 11.3 Hz, 12H), 1.16-1.07 (m, 3H). <sup>13</sup>C NMR (126 MHz, CDCl<sub>3</sub>) δ 210.60, 145.99, 142.84, 128.66, 126.41, 123.58, 123.02, 83.79, 79.94, 67.64, 35.54, 26.18, 24.52, 24.31, 7.62. ESI-MS calculated for C<sub>19</sub>H<sub>27</sub>BNaO<sub>4</sub>: *m/z* (%): 353.1898 (M+Na<sup>+</sup>), found: 353.1890. Enantiomeric excess was determined by HPLC with a Chiralpak AD-H column (hexanes: 2-propanol = 90:10, 0.8 mL/min, 210 nm); minor enantiomer *tr* = 7.7 min, major enantiomer *tr* = 6.2 min. [α]<sub>D</sub><sup>20</sup> = -8.3 (*c* = 0.17, CHCl<sub>3</sub>).

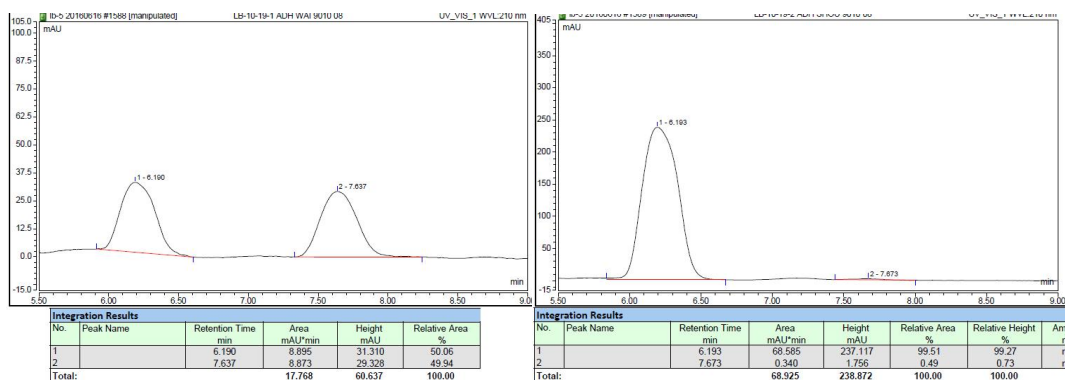

### 3.19 Synthesis of 1-((1*R*,2*R*,3*S*)-1-hydroxy-1-methyl-3-(4,4,5,5-tetramethyl-1,3,2-dioxaborolan-2-yl)-2,3-dihydro-1*H*-inden-2-yl)butan-1-one (**3s**).

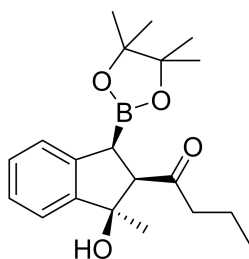

**3s**

The reaction of alkene **1** (64.8 mg, 0.3 mmol) and **2** (76.0 mg, 0.45 mmol), after a flash column chromatography (hexanes: AcOEt = 10:1) afforded the product **3s** as a white solid (69 mg, 67% yield) with 95% ee. <sup>1</sup>H NMR (300 MHz, CDCl<sub>3</sub>) δ 7.34-7.31 (m, 1H), 7.21-7.12 (m, 3H), 4.31 (s, 1H), 3.53 (d, *J* = 8.1 Hz, 1H), 2.81-2.70 (m, 2H), 2.64-2.53 (m, 1H), 1.90 (s, 3H), 1.74-1.59 (m, 2H), 1.16 (d, *J* = 11.8 Hz, 12H), 0.89 (t, *J* = 6.8 Hz, 3H). <sup>13</sup>C NMR (126 MHz, CDCl<sub>3</sub>) δ 210.14, 145.95, 142.76, 128.60, 126.34, 123.52, 122.95, 83.7, 79.93, 67.76, 44.20, 26.18, 24.48, 24.24, 16.97, 13.69. ESI-MS calculated for Chemical Formula: C<sub>20</sub>H<sub>29</sub>BNaO<sub>4</sub>, Exact Mass: *m/z* (%): 367.2051 (M+Na<sup>+</sup>), found: 367.2049. Enantiomeric excess was determined by HPLC with a Chiralpak AD-H column (hexanes: 2-propanol = 90:10, 0.8 mL/min, 210 nm); minor enantiomer *tr* = 6.2 min, major enantiomer *tr* = 7.5 min. [α]<sub>D</sub><sup>20</sup> = +8.4 (*c* = 0.17, CHCl<sub>3</sub>).

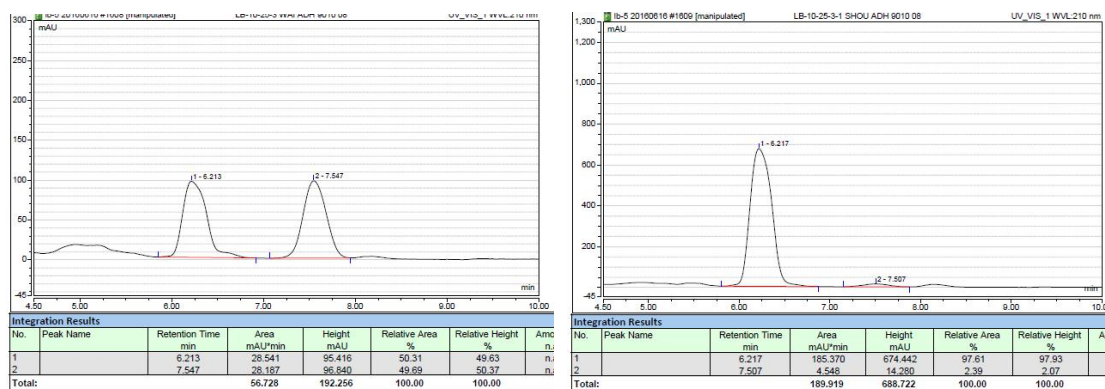

### 3.20 Synthesis of 1-((1*R*,2*R*,3*S*)-1-hydroxy-1-methyl-3-(4,4,5,5-tetramethyl-1,3,2-dioxaborolan-2-yl)-2,3-dihydro-1*H*-inden-2-yl)hexan-1-one (**3t**).

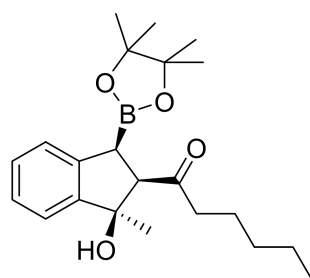

**3t**

The reaction of alkene **1** (73.2 mg, 0.3 mmol) and **2** (114.0 mg, 0.45 mmol), after a flash column chromatography (hexanes: AcOEt = 10:1) afforded the product **3t** as a white solid (76 mg, 68% yield) with 96% ee. <sup>1</sup>H NMR (300 MHz, CDCl<sub>3</sub>) δ 7.37-7.34 (m, 1H), 7.25-7.14 (m, 3H), 4.34 (s, 1H), 3.54 (d, *J* = 8.1 Hz, 1H), 2.83-2.72 (m, 2H), 2.65-2.54 (m, 1H), 1.93 (s, 3H), 1.77-1.65 (m, 3H), 1.27-1.24 (m, 3H), 1.18 (d, *J* = 11.5 Hz, 12H), 0.97 (t, *J* = 7.4 Hz, 3H). <sup>13</sup>C NMR (126 MHz, CDCl<sub>3</sub>) δ 210.30, 145.96, 142.79, 128.60, 126.34, 123.52, 122.95, 83.71, 79.93, 67.74, 42.28, 31.34, 26.17, 24.48, 24.24, 23.22, 22.40, 13.87. ESI-MS calculated for C<sub>22</sub>H<sub>33</sub>BNaO<sub>4</sub>: *m/z* (%): 395.2364 (M+Na<sup>+</sup>), found: 395.2372. Enantiomeric excess was determined by HPLC with a Chiralpak AD-H+ADH column (hexanes: 2-propanol = 90:10, 0.8 mL/min, 210 nm); minor enantiomer *tr* = 13.6 min, major enantiomer *tr* = 11.4 min.  $[\alpha]_D^{20} = -70.4$  (*c* = 0.17, CHCl<sub>3</sub>).

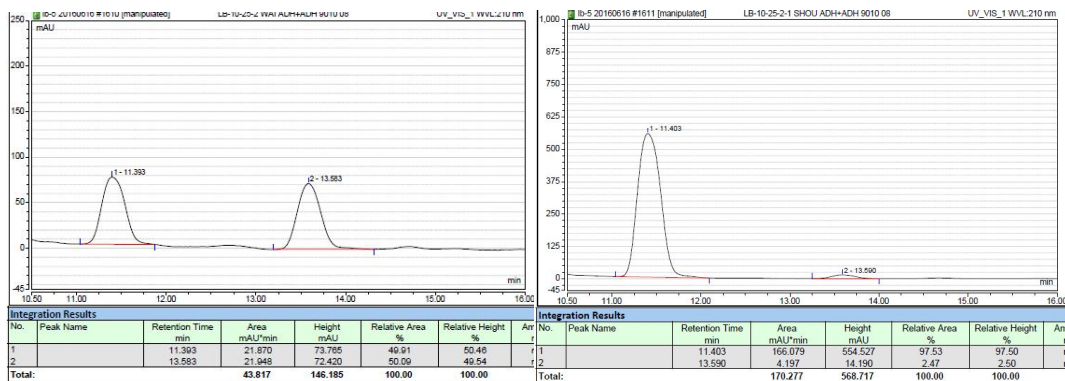

### 3.21 Synthesis of 1-((1*S*,2*R*,3*S*)-1-hydroxy-1-phenyl-3-(4,4,5,5-tetramethyl-1,3,2-dioxaborolan-2-yl)-2,3-dihydro-1*H*-inden-2-yl)propan-1-one (**3u**)

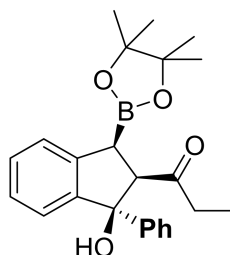

**3u**

The reaction of alkene **1** (79.2 mg, 0.3 mmol) and **2** (114.0 mg, 0.45 mmol), after a flash column chromatography (hexanes: AcOEt = 10:1) afforded the product **3u** as a white solid (86 mg, 73% yield) with 96% ee. <sup>1</sup>H NMR (500 MHz, CDCl<sub>3</sub>) δ 7.49 (d, *J* = 7.3 Hz, 2H), 7.28 (t, *J* = 7.6 Hz, 2H), 7.21-7.18 (m, 1H), 7.10 (d, *J* = 3.9 Hz, 2H), 6.98-6.95 (m, 1H), 6.65 (d, *J* = 7.6 Hz, 1H), 4.78 (s, 1H), 3.98 (d, *J* = 8.2 Hz, 1H), 2.87 (d, *J* = 8.1 Hz, 1H), 2.15-2.10 (m, 1H), 1.81-1.76 (m, 1H), 1.12 (d, *J* = 23.0 Hz, 12H), 0.77 (t, *J* = 7.3 Hz, 3H). <sup>13</sup>C NMR (126 MHz, CDCl<sub>3</sub>) δ 210.20, 147.61, 144.79, 143.15, 128.66, 127.89, 126.91, 126.70, 126.44, 125.15, 123.30, 84.46, 84.05, 70.43, 34.72, 24.50, 24.30, 7.31. ESI-MS calculated for C<sub>24</sub>H<sub>29</sub>BNaO<sub>4</sub>: *m/z* (%): 415.2055 (M+Na<sup>+</sup>), found: 415.2060. Enantiomeric excess was determined by HPLC with a Chiralpak AD-H+ADH column (hexanes: 2-propanol = 90:10, 0.8 mL/min, 210 nm); minor enantiomer *tr* = 13.9 min, major enantiomer *tr* = 14.3 min. [α]<sub>D</sub><sup>20</sup> = -82.8 (*c* = 0.17, CHCl<sub>3</sub>).



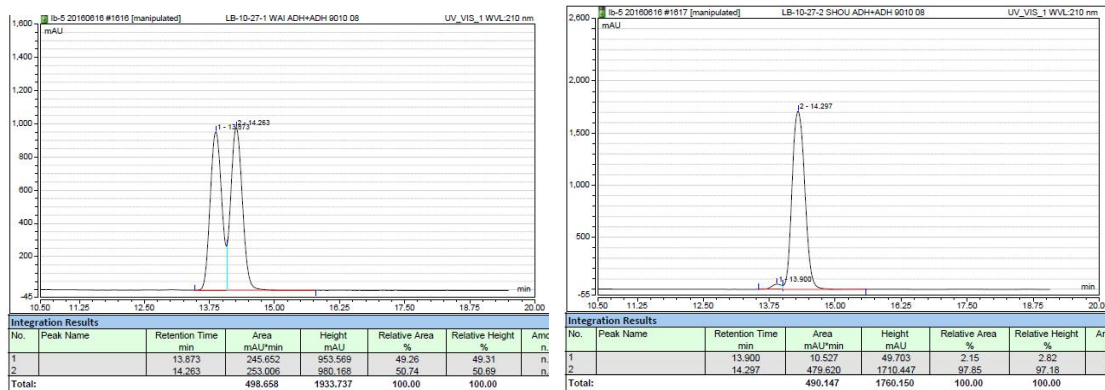

### 3.22 Synthesis of 1-((1*R*,2*R*,3*S*)-1-hydroxy-1-methyl-3-(4,4,5,5-tetramethyl-1,3,2-dioxaborolan-2-yl)-2,3-dihydro-1*H*-inden-2-yl)-2-phenylethan-1-one (**3v**)

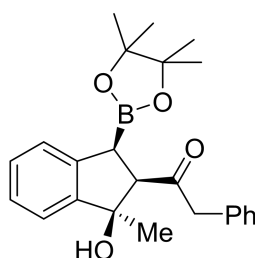

**3v**

The reaction of alkene **1** (52.8 mg, 0.2 mmol) and **2** (76 mg, 0.3 mmol), after a flash column chromatography (hexanes: AcOEt = 10:1) afforded the product **3v** as a colorless ropy liquid (49.4 mg, 63% yield) with 90% ee. <sup>1</sup>H NMR (300 MHz, CDCl<sub>3</sub>) δ 7.40-7.32 (m, 4H), 7.29-7.23 (m, 4H), 7.18-7.15 (m, 1H), 4.47 (s, 1H), 4.11 (d, *J* = 16.1 Hz, 1H), 4.00 (d, *J* = 15.9 Hz, 1H), 3.68 (d, *J* = 8.1 Hz, 1H), 2.79 (d, *J* = 8.0 Hz, 1H), 2.01 (s, 3H), 1.18 (d, *J* = 12.5 Hz, 12H). <sup>13</sup>C NMR (126 MHz, CDCl<sub>3</sub>) δ 207.53, 145.87, 142.74, 134.03, 129.69, 128.73, 128.51, 126.84, 126.49, 123.57, 123.05, 83.92, 80.16, 66.56, 49.17, 26.51, 24.99, 24.57, 24.28. ESI-MS calculated for C<sub>24</sub>H<sub>29</sub>BNaO<sub>4</sub>: *m/z* (%): 415.2051 (M+Na<sup>+</sup>), found: 415.2047. Enantiomeric excess was determined by HPLC with a Chiralpak ADH column (hexanes: 2-propanol = 90:10, 0.8 mL/min, 200 nm); minor enantiomer *tr* = 11.4 min, major enantiomer *tr* = +8.8 min. [α]<sub>D</sub><sup>20</sup> = -5.8 (*c* = 0.17, CHCl<sub>3</sub>).

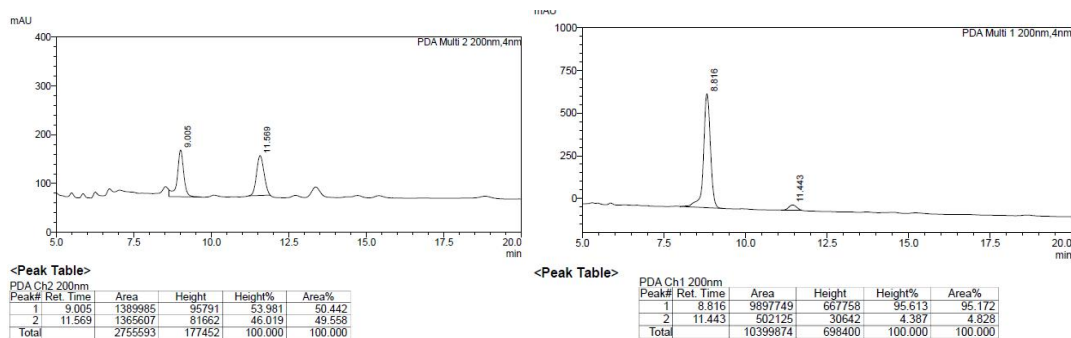

### 3.23 Synthesis of ethyl (1*R*,2*R*,3*S*)-1-((4-bromophenyl)amino)-3-(4,4,5,5-tetramethyl-1,3,2-dioxaborolan-2-yl)-2,3-dihydro-1*H*-indene-2-carboxylate (**5**)

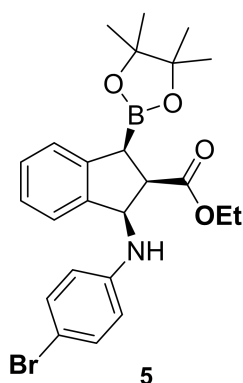

The reaction of alkene **4** (71.4 mg, 0.2 mmol) and **2** (76.0 mg, 0.3 mmol), after a flash column chromatography (hexanes: AcOEt = 10:1) afforded the product **5** as a ropy liquid (22.3 mg, 23% yield) with 94% ee. <sup>1</sup>H NMR (300 MHz, CDCl<sub>3</sub>) δ 7.45–7.20 (m, 2H), 7.19–6.97 (m, 1H), 6.61 (d, *J* = 8.8 Hz, 1H), 5.48–5.08 (m, 1H), 4.00 (dq, *J* = 10.9, 7.1 Hz, 1H), 3.78 (ddd, *J* = 15.4, 9.6, 6.8 Hz, 1H), 2.98 (d, *J* = 8.5 Hz, 1H), 1.28 (d, *J* = 14.1 Hz, 4H), 1.06 (t, *J* = 7.1 Hz, 1H). <sup>13</sup>C NMR (126 MHz, CDCl<sub>3</sub>) δ 172.67, 146.67, 143.48, 142.35, 131.72, 128.48, 126.45, 124.58, 124.03, 115.11, 108.30, 83.96, 60.77, 59.53, 52.55, 24.82, 24.60, 13.93. ESI-MS calculated for C<sub>24</sub>H<sub>29</sub>BBrNNaO<sub>4</sub>: *m/z* (%): 508.1265 (M+Na<sup>+</sup>), found: 508.1269. Enantiomeric excess was determined by HPLC with a Chiralpak ODH column (hexanes: 2-propanol = 90:10, 0.8 mL/min, 275 nm); minor enantiomer *tr* = 5.1 min, major enantiomer *tr* = 6.1 min. [ $\alpha$ ]<sub>D</sub><sup>20</sup> = +80.1 (*c* = 0.17, CHCl<sub>3</sub>).

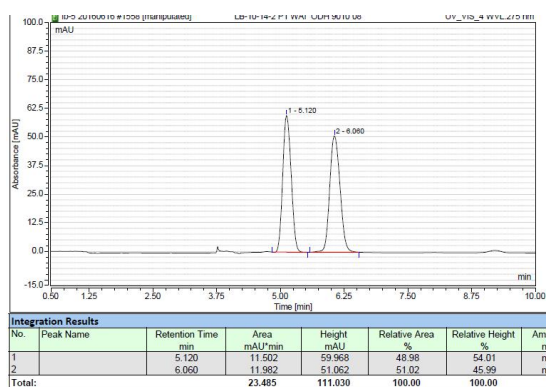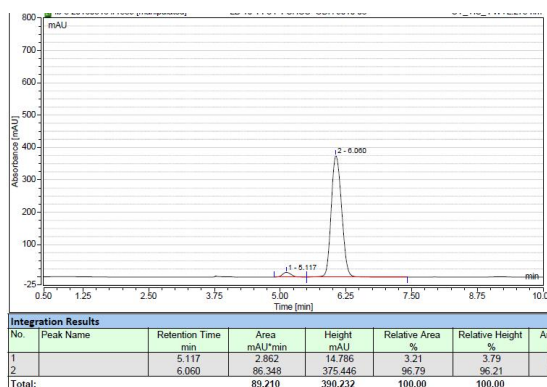

### 3.26 Synthesis of benzyl (1*S*,2*R*,3*S*)-3-hydroxy-1-(4,4,5,5-tetramethyl-1,3,2-dioxaborolan-2-yl)-1,2,3,4-tetrahydronaphthalene-2-carboxylate (**7**).

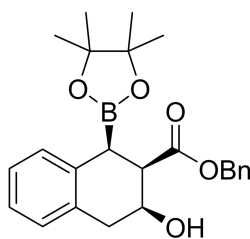

**7**

The reaction of alkene **6** (0.2 mmol) and **2** (0.3 mmol), after a flash column chromatography (hexanes: AcOEt = 10:1) afforded the product **7** as a ropy liquid (77% yield) with 99% ee. <sup>1</sup>H NMR (500 MHz, CDCl<sub>3</sub>) δ 7.36–7.31 (m, 6H), 7.14–7.07 (m, 3H), 5.21 (q, *J* = 12.4 Hz, 2H), 4.63 (s, 1H), 3.14–3.08 (m, 3H), 2.95–2.91 (m, 1H), 2.45 (d, *J* = 4.9 Hz, 1H), 1.19 (d, *J* = 1.9 Hz, 12H). <sup>13</sup>C NMR (126 MHz, CDCl<sub>3</sub>) δ 174.35, 135.74, 134.33, 131.83, 130.12, 128.51, 128.28, 128.17, 128.04, 126.07, 125.61, 83.71, 66.55, 65.31, 46.42, 36.82, 24.77, 24.30. ESI-MS calculated for C<sub>24</sub>H<sub>29</sub>BNaO<sub>5</sub>: *m/z* (%): 431.2005 (M+Na<sup>+</sup>), found: 431.2006. Enantiomeric excess was determined by HPLC with a Chiralpak ADH column (hexanes: 2-propanol = 85:15, 0.8 mL/min, 210 nm); minor enantiomer *tr* = 11.6 min, major enantiomer *tr* = 18.8 min. [α]<sub>D</sub><sup>20</sup> = +11.5 (*c* = 0.17, CHCl<sub>3</sub>).

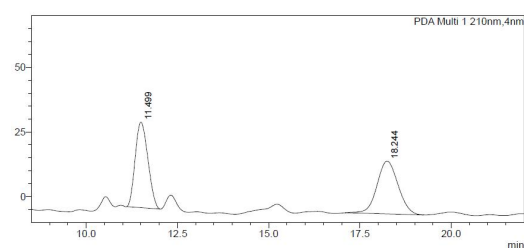

Peak Table>

| Peak# | Ret. Time | Area    | Height | Height% | Area%   |
|-------|-----------|---------|--------|---------|---------|
| 1     | 11.469    | 801218  | 33104  | 81.804  | 49.365  |
| 2     | 18.244    | 821842  | 20459  | 38.196  | 50.635  |
| Total |           | 1623060 | 53563  | 100.000 | 100.000 |

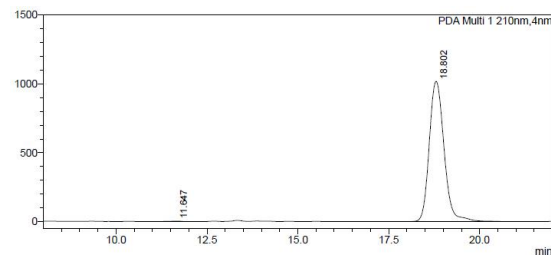

Peak Table>

| Peak# | Ret. Time | Area     | Height  | Height% | Area%   |
|-------|-----------|----------|---------|---------|---------|
| 1     | 11.647    | 54334    | 3175    | 0.311   | 0.188   |
| 2     | 18.802    | 28788365 | 1016923 | 99.689  | 99.812  |
| Total |           | 28842699 | 1020098 | 100.000 | 100.000 |

3.28 Synthesis of benzyl (5*S*,6*R*,7*S*)-7-hydroxy-5-(4,4,5,5-tetramethyl-1,3,2-dioxaborolan-2-yl)-6,7,8,9-tetrahydro-5*H*-benzo[7]annulene-6-carboxylate (**9**)

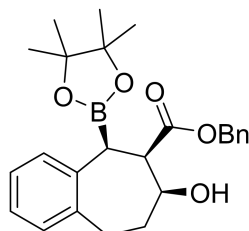

**9**

The reaction of alkene **8** (0.2 mmol) and **2** (76.0 mg, 0.3 mmol), after a flash column chromatography (hexanes: AcOEt = 10:1) afforded the product **9** as a ropy liquid (70% yield) with 98% ee. <sup>1</sup>H NMR (500 MHz, CDCl<sub>3</sub>) δ 7.36–7.33 (m, 3H), 7.23–7.22 (m, 2H), 7.11–7.09 (m, 2H), 7.03–7.00 (m, 1H), 6.95 (d, *J* = 7.0 Hz, 1H), 5.00 (d, *J* = 12.1 Hz, 1H), 4.86 (d, *J* = 12.1 Hz, 1H), 4.15–4.11 (m, 1H), 3.44 (s, 1H), 3.16 (d, *J* = 4.6 Hz, 2H), 2.77 (d, *J* = 4.6 Hz, 1H), 2.63 (t, *J* = 13.2 Hz, 1H), 2.09 (s, 1H), 1.94 (dd, *J* = 24.0, 12.2 Hz, 1H), 1.23 (d, *J* = 10.8 Hz, 12H). <sup>13</sup>C NMR (126 MHz, CDCl<sub>3</sub>) δ 173.92, 141.69, 138.53, 135.44, 130.98, 129.09, 128.48, 128.47, 128.24, 126.52, 126.22, 83.92, 72.62, 66.27, 48.94, 33.02, 31.35, 24.76, 24.72. ESI-MS calculated for C<sub>19</sub>H<sub>27</sub>BNaO<sub>5</sub>: *m/z* (%): 369.1847 (M+Na<sup>+</sup>), found: 369.1841. Enantiomeric excess was determined by HPLC with a Chiralpak ODH column (hexanes: 2-propanol = 85:15, 0.8 mL/min, 210 nm); minor enantiomer *tr* = 6.2 min, major enantiomer *tr* = 7.2 min. [α]<sub>D</sub><sup>20</sup> = +13.8 (*c* = 0.17, CHCl<sub>3</sub>).

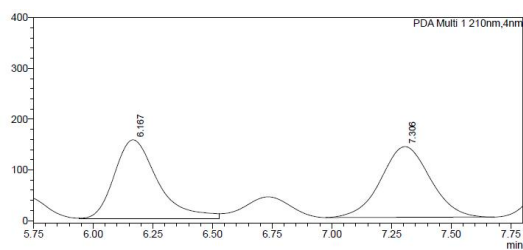

Peak Table>

| Peak# | Ret. Time | Area    | Height | Height% | Area%   |
|-------|-----------|---------|--------|---------|---------|
| 1     | 6.167     | 1999698 | 156251 | 52.838  | 49.838  |
| 2     | 7.306     | 2012737 | 139465 | 47.162  | 50.162  |
| Total |           | 4012435 | 295716 | 100.000 | 100.000 |

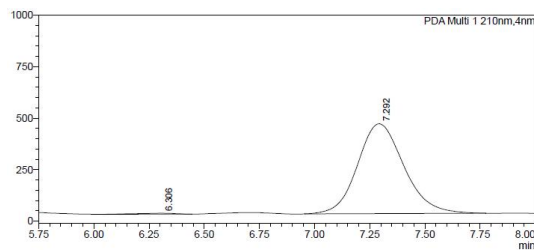

Peak Table>

| Peak# | Ret. Time | Area    | Height | Height% | Area%   |
|-------|-----------|---------|--------|---------|---------|
| 1     | 6.306     | 55202   | 4327   | 0.982   | 0.855   |
| 2     | 7.292     | 6402828 | 436287 | 99.018  | 99.145  |
| Total |           | 6458030 | 440615 | 100.000 | 100.000 |

## References

- (1) (a) M. R. Sk, S. S. Bera, and M. S. Maji, Cp\*Co(III)-Catalyzed C-H Alkenylation of Aromatic Ketones with Alkenes. *Adv. Synth. Catal.* DOI: 10.1002/adsc.201801385 (b) G. Li, L. Wan, G. Zhang, D. Leow, J. Spangler, and J.-Q. Yu, Pd(II)-Catalyzed C-H Functionalizations Directed by Distal Weakly Coordinating Functional Groups. *J. Am. Chem. Soc.* **2015**, *137*, 4391–4397.

## 4 NMR Spectra for New Compounds

$^1\text{H}$  NMR (300 MHz,  $\text{CDCl}_3$ ) and  $^{13}\text{C}$  NMR (126 MHz,  $\text{CDCl}_3$ ) of **3a**

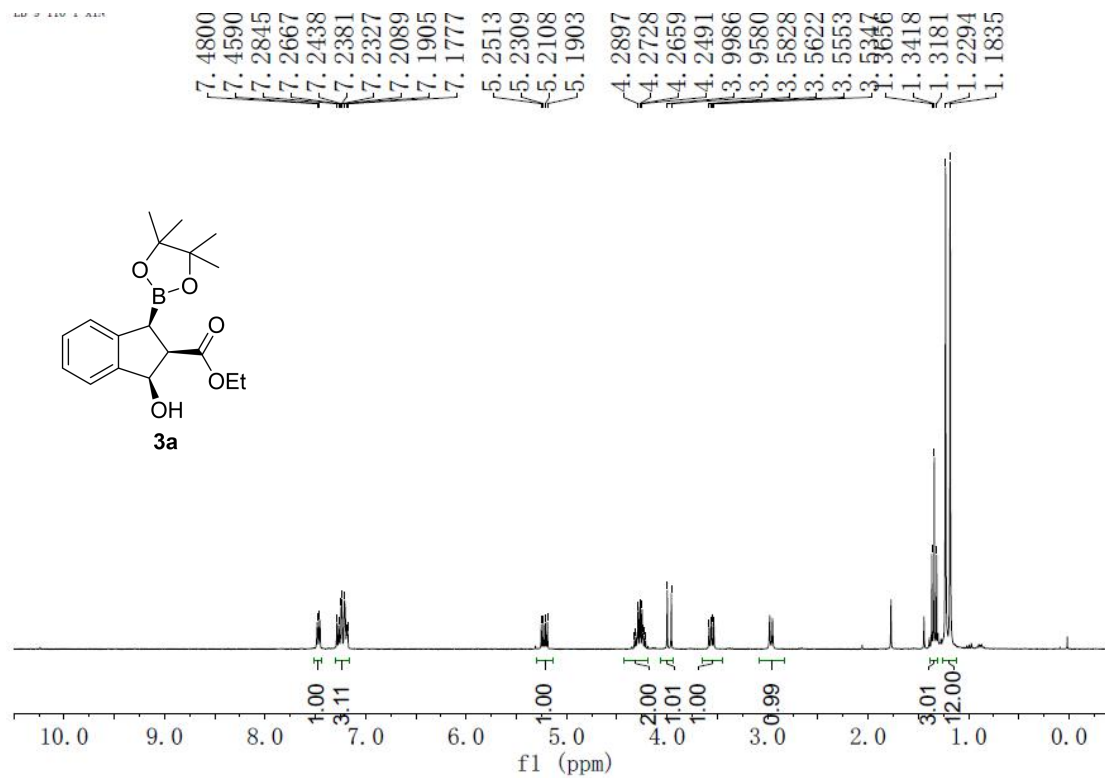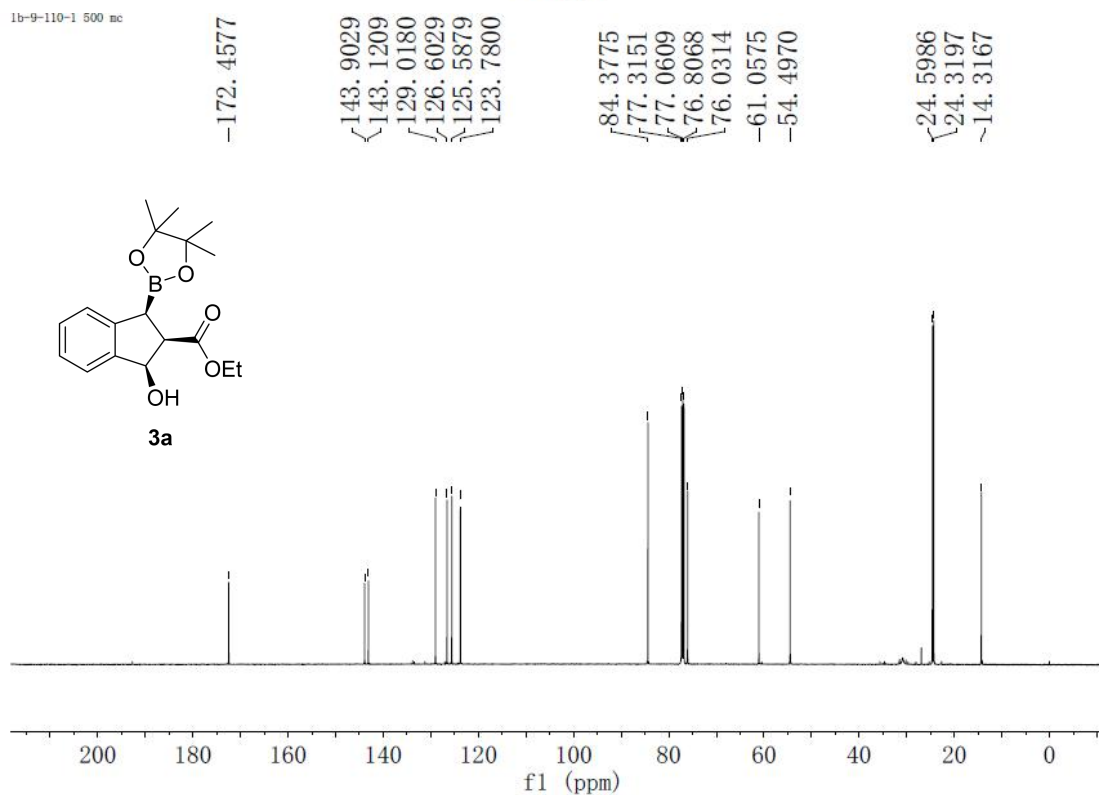

**<sup>1</sup>H NMR (300 MHz, CDCl<sub>3</sub>) and <sup>13</sup>C NMR (126 MHz, CDCl<sub>3</sub>) of 3b**

128-2

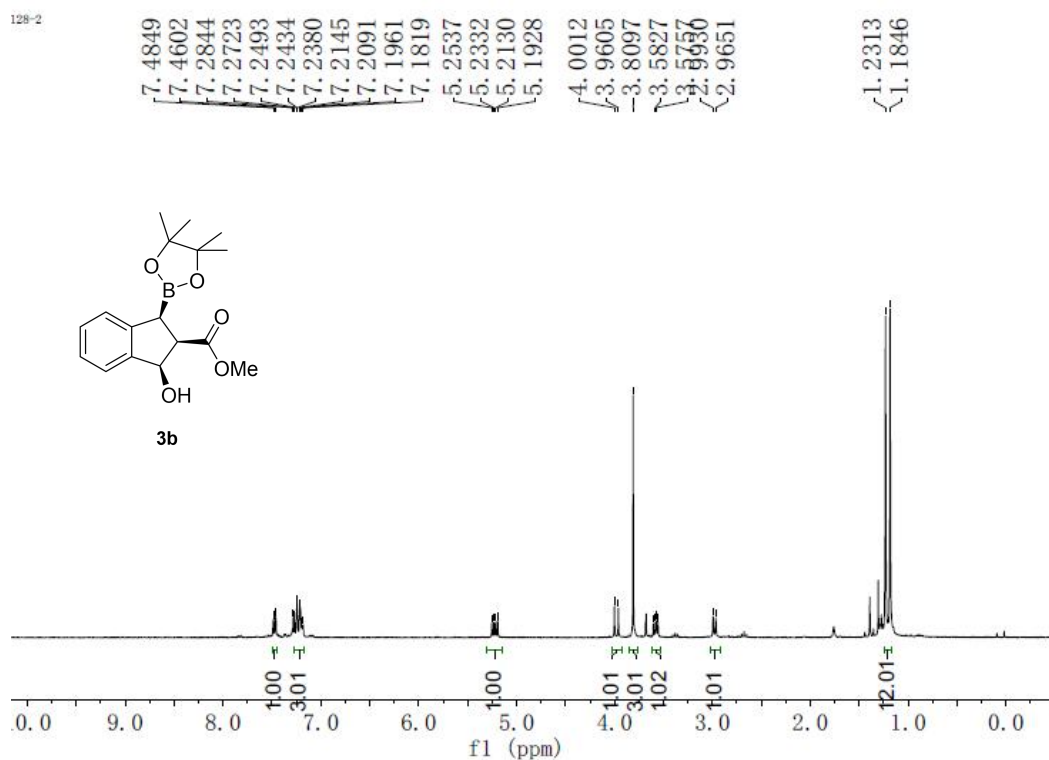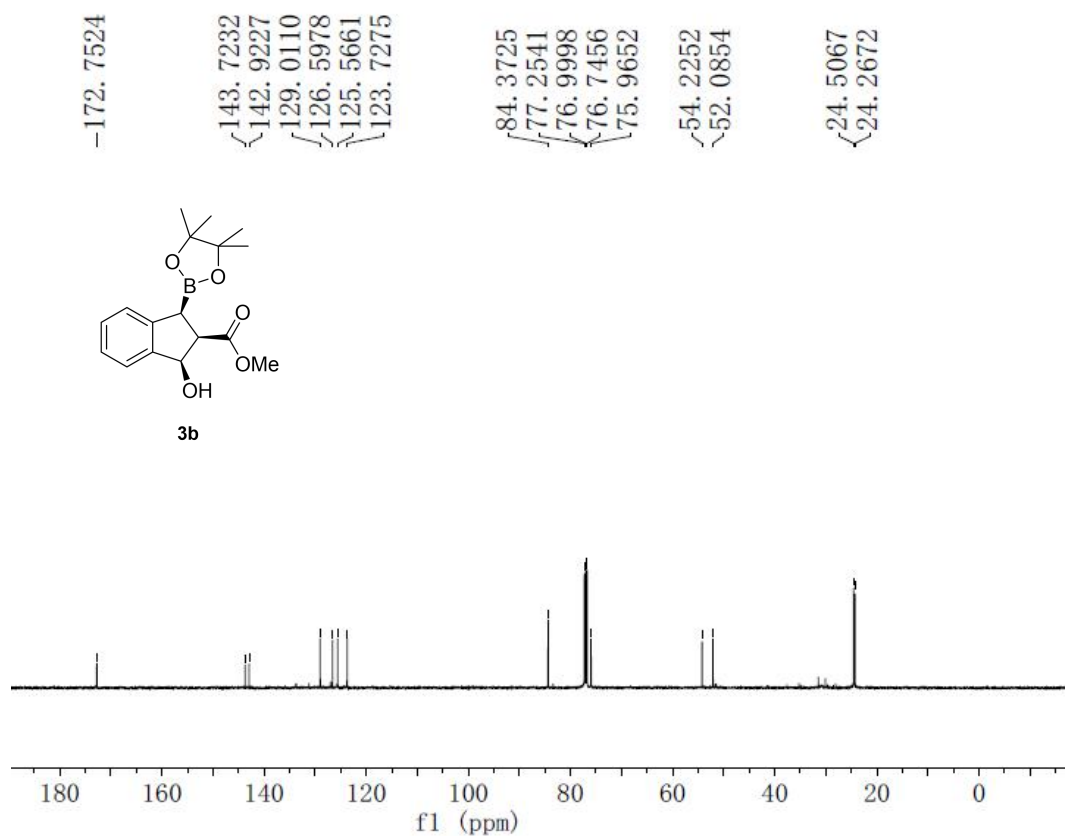

**<sup>1</sup>H NMR (300 MHz, CDCl<sub>3</sub>) and <sup>13</sup>C NMR (126 MHz, CDCl<sub>3</sub>) of 3c**

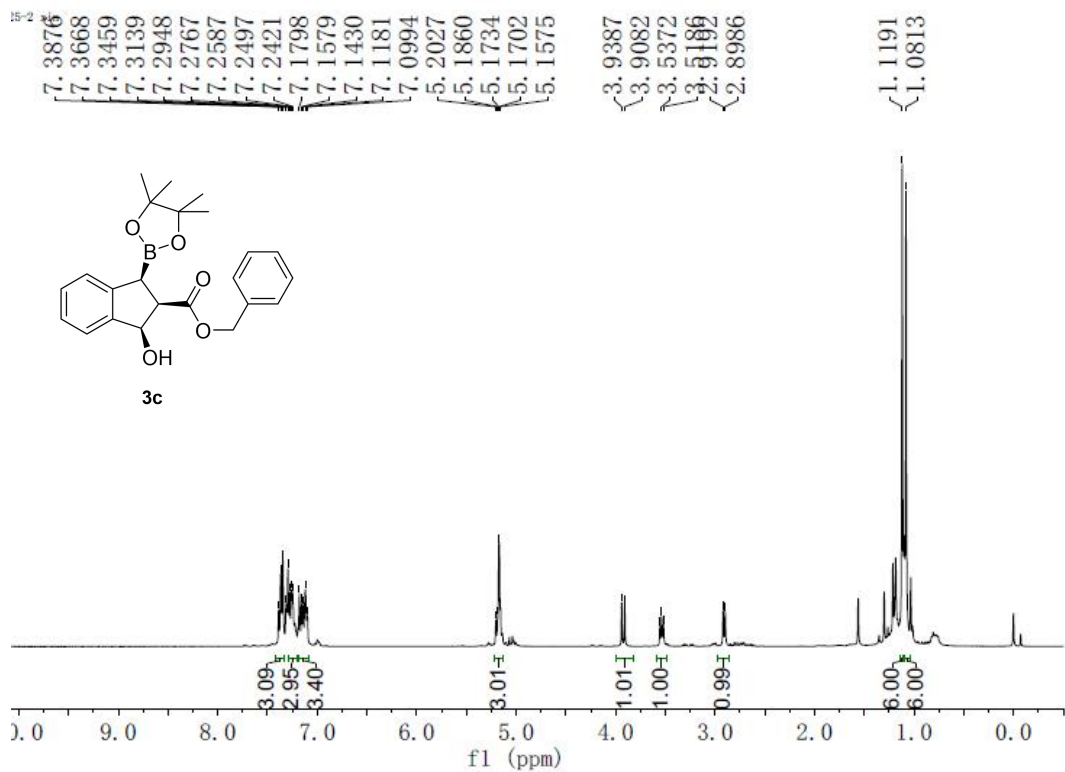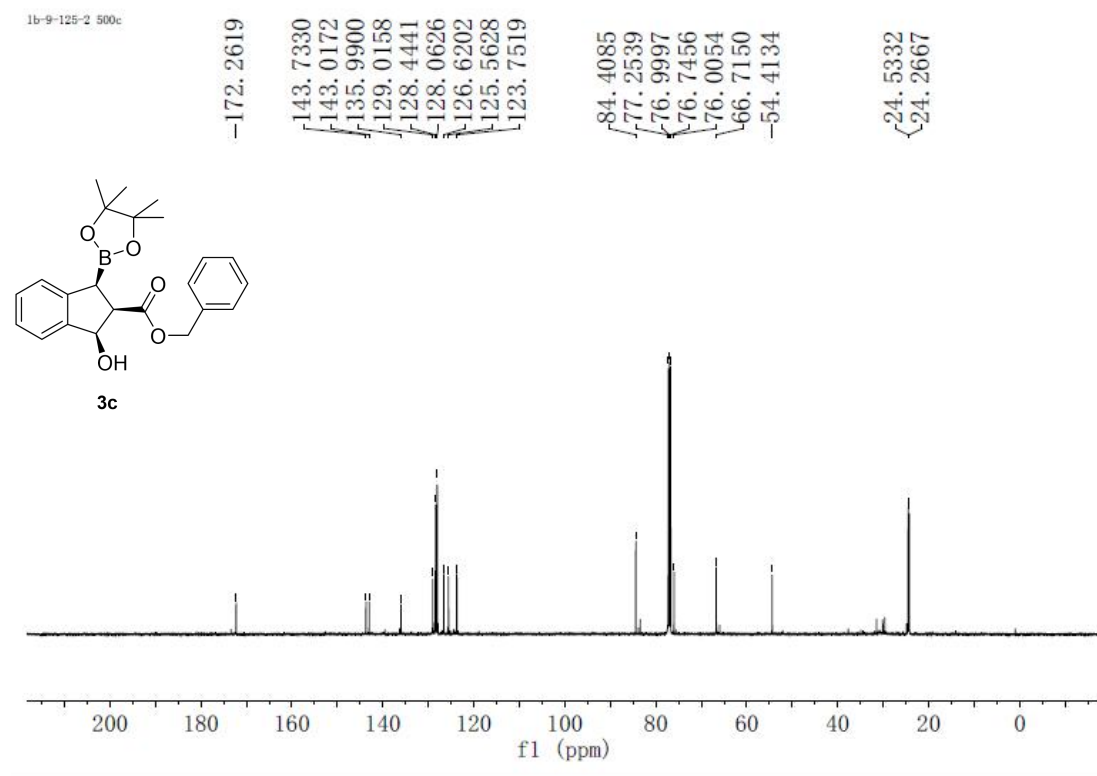



**<sup>1</sup>H NMR (300 MHz, CDCl<sub>3</sub>) and <sup>13</sup>C NMR (126 MHz, CDCl<sub>3</sub>) of 3d**

LB-10-1-2XIN

7.4638  
7.4419  
7.3857  
7.3566  
7.3439  
7.3233  
7.3158  
7.2944  
7.2355  
7.2295  
7.2001  
7.1934  
7.1663  
5.2717  
5.2542  
5.2288  
5.2139  
5.1799  
4.0065  
3.9655  
3.6273  
3.6071  
3.6001  
3.5796

1.1831  
1.1512

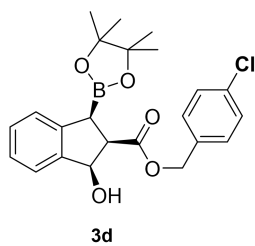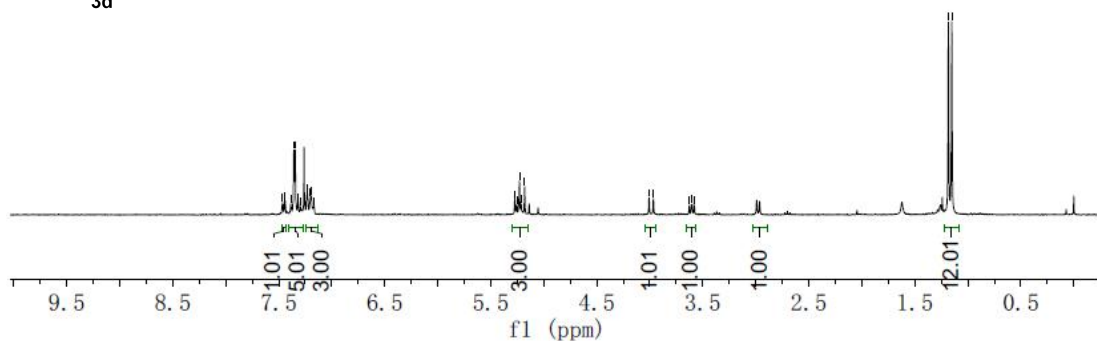

LB-10-1-2 500C

-172.1850  
143.6414  
142.9085  
134.5451  
133.9031  
129.4257  
129.0767  
128.6074  
126.6716  
125.5668  
123.7606  
84.4453  
77.2544  
77.0004  
76.7464  
76.0100  
65.8724  
54.3589  
24.5294  
24.2639

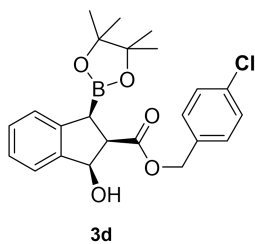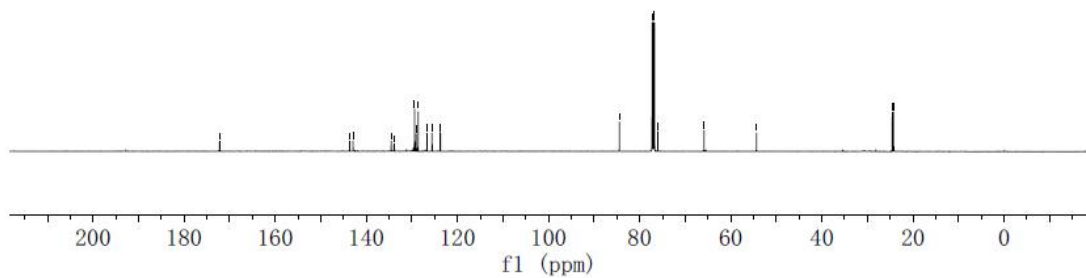

**<sup>1</sup>H NMR** (300 MHz, CDCl<sub>3</sub>), **<sup>19</sup>F NMR** (282 MHz, CDCl<sub>3</sub>) and **<sup>13</sup>C NMR** (126 MHz, CDCl<sub>3</sub>) of **3e**

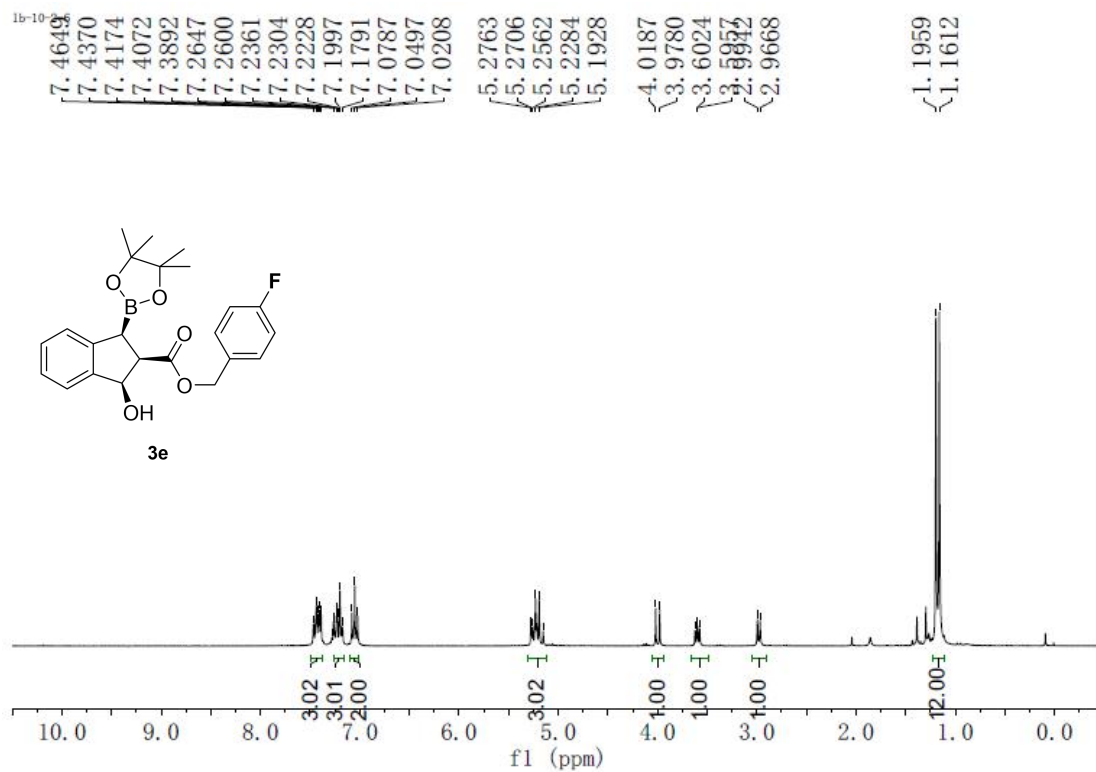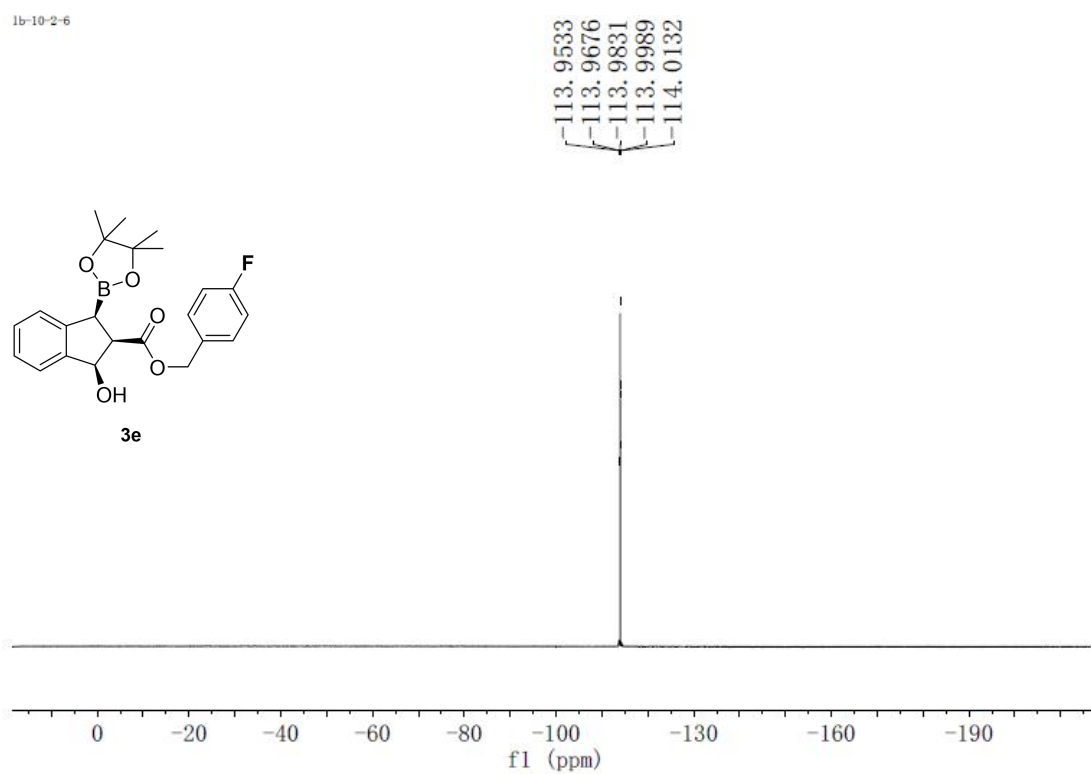

1b-10-2-6 500c

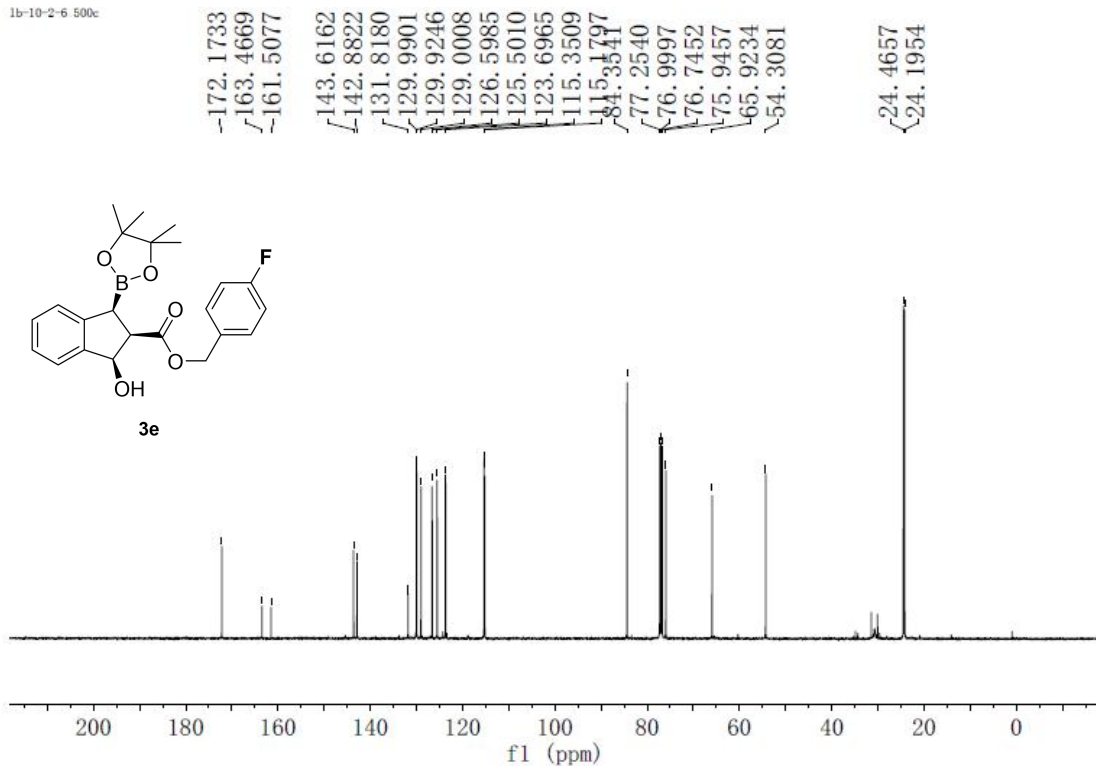

$^1\text{H}$  NMR (300 MHz,  $\text{CDCl}_3$ ),  $^{19}\text{F}$  NMR (282 MHz,  $\text{CDCl}_3$ ) and  $^{13}\text{C}$  NMR (126 MHz,  $\text{CDCl}_3$ ) of **3f**

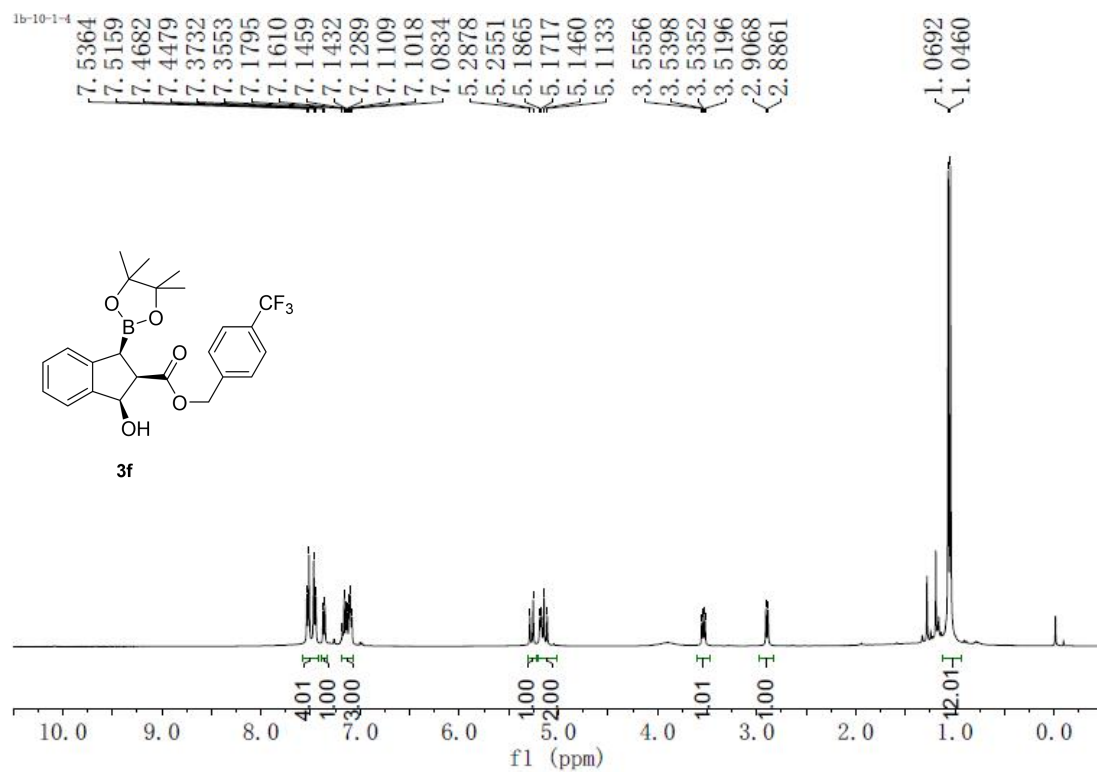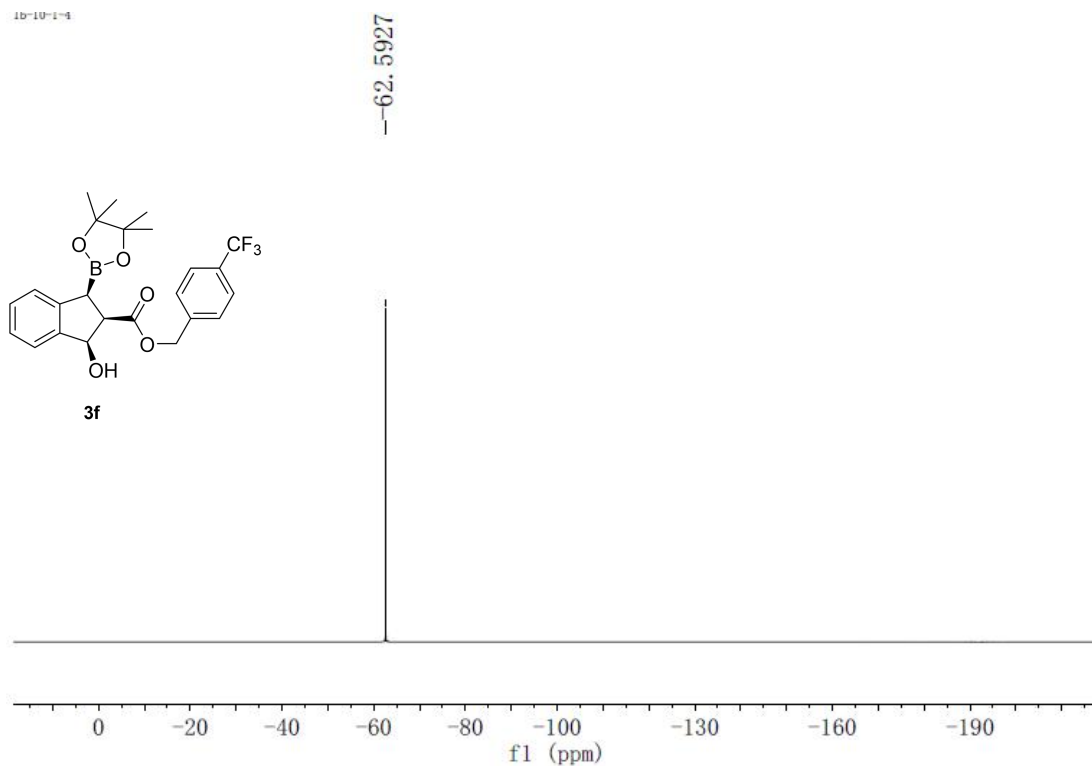

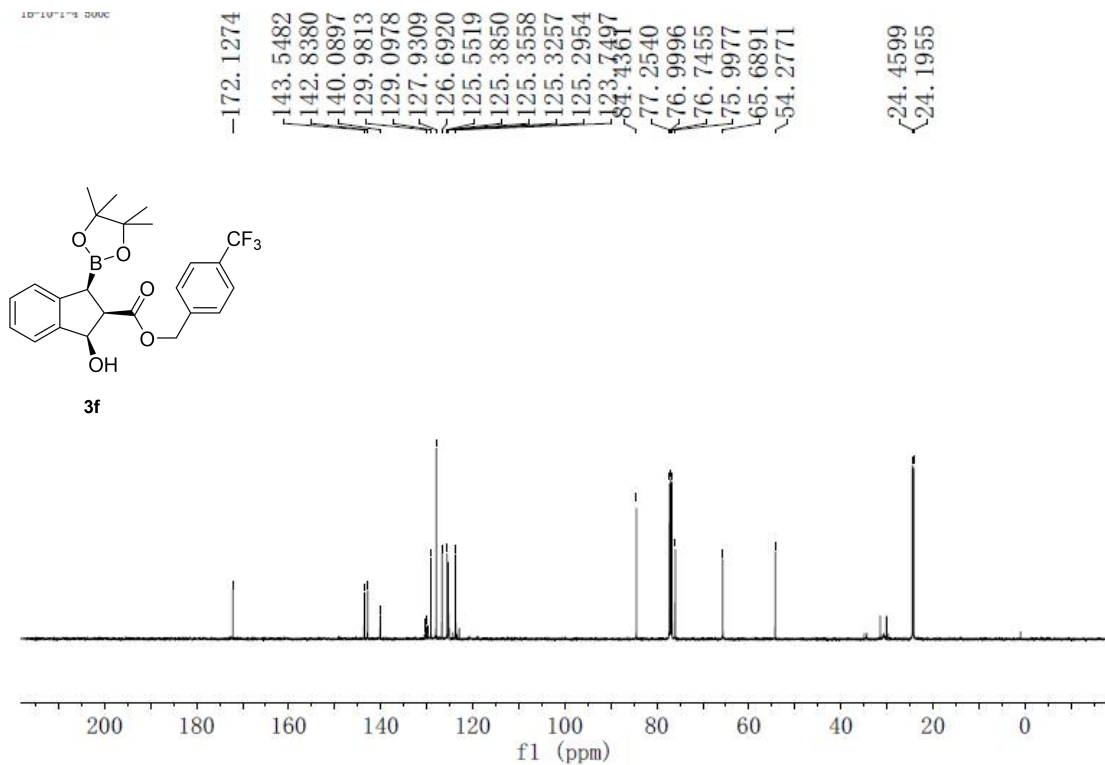

$^1\text{H}$  NMR (300 MHz,  $\text{CDCl}_3$ ),  $^{19}\text{F}$  NMR (282 MHz,  $\text{CDCl}_3$ ) and  $^{13}\text{C}$  NMR (126 MHz,  $\text{CDCl}_3$ ) of **3g**

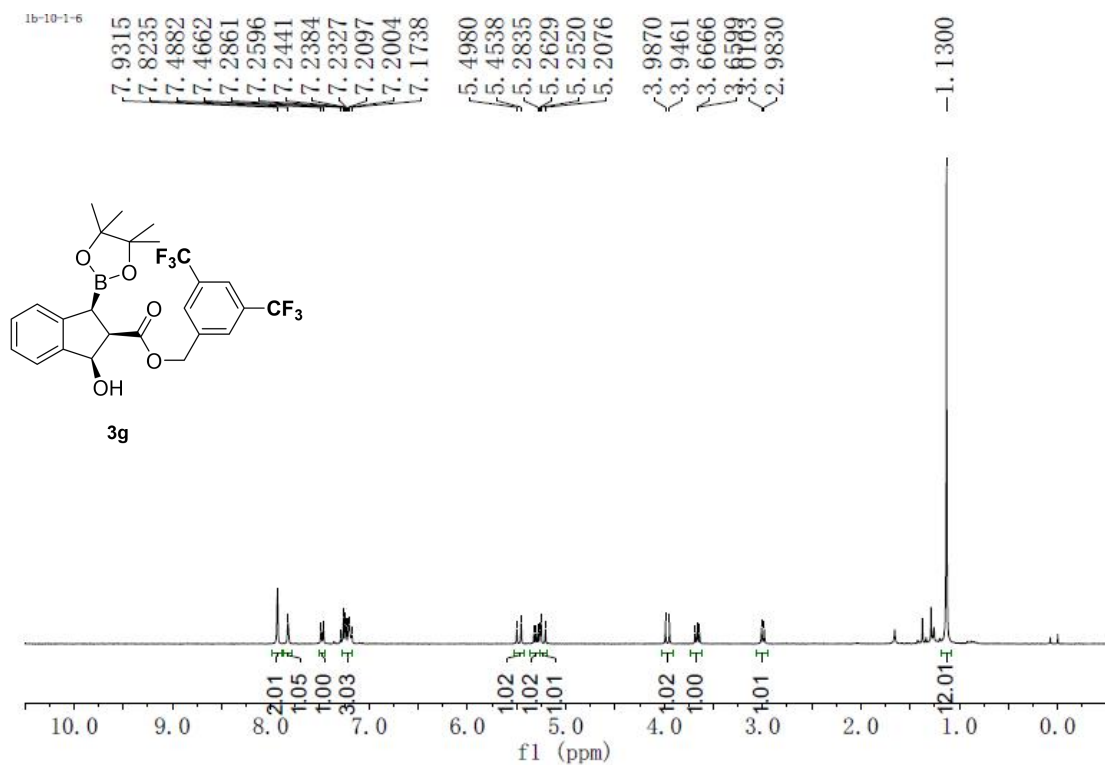

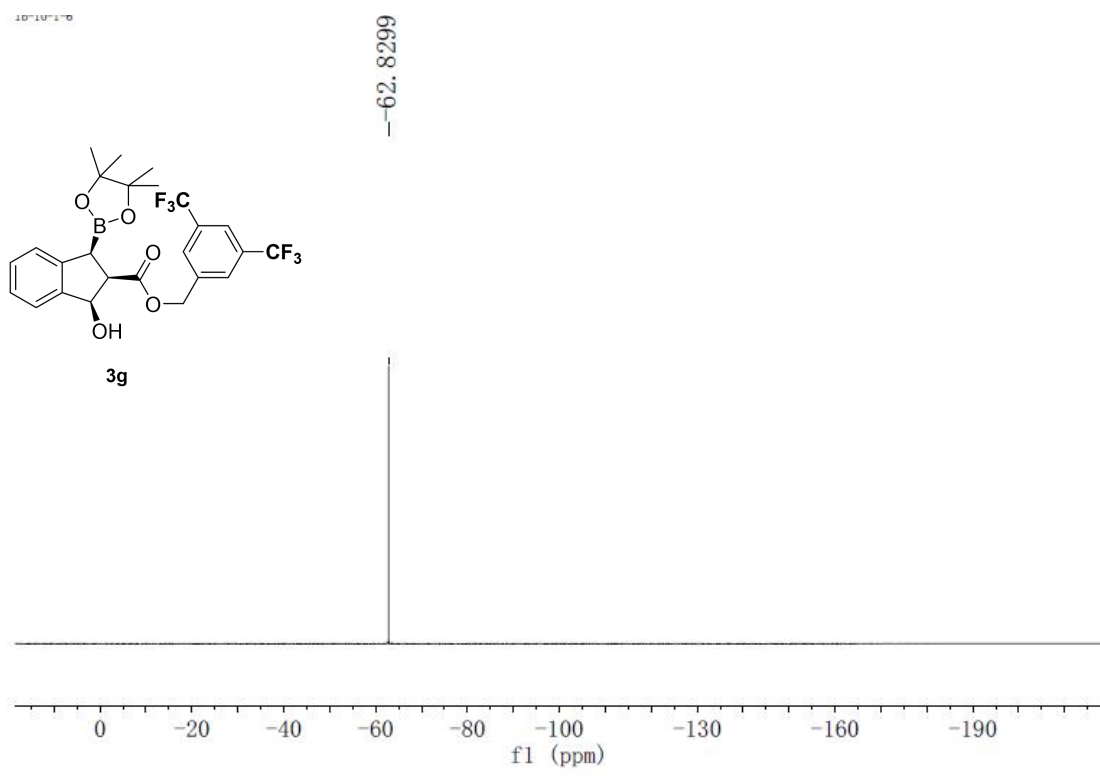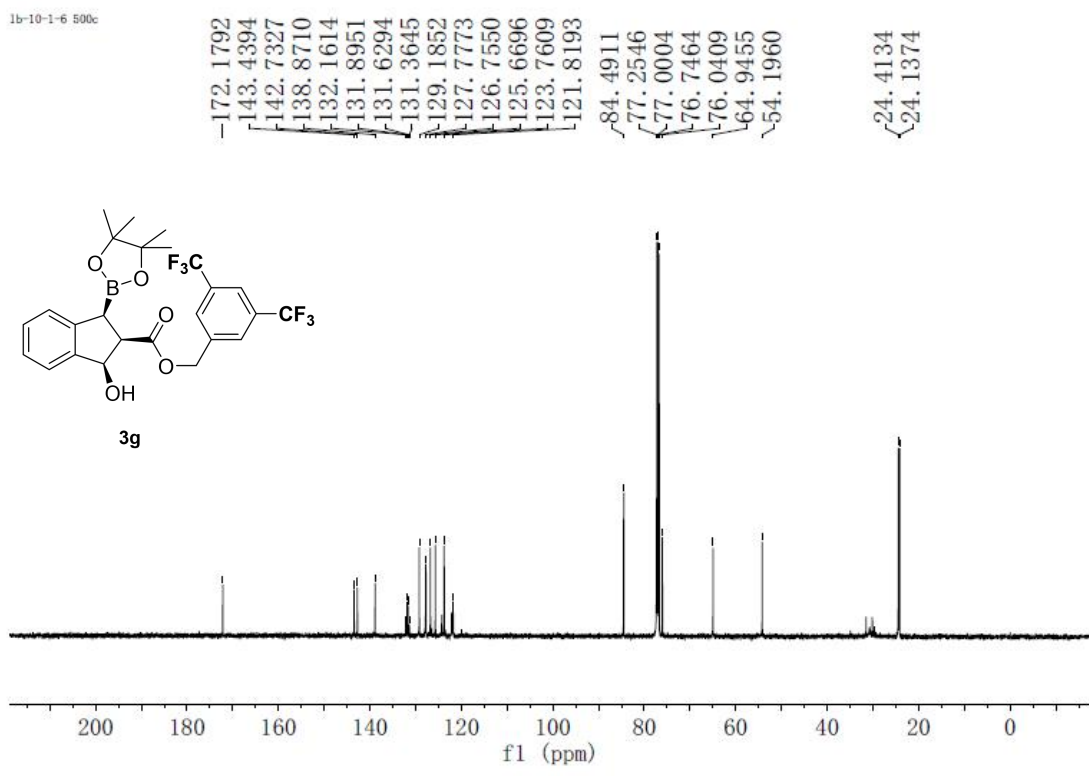

**<sup>1</sup>H NMR** (300 MHz, CDCl<sub>3</sub>), **<sup>19</sup>F NMR** (282 MHz, CDCl<sub>3</sub>) and **<sup>13</sup>C NMR** (126 MHz, CDCl<sub>3</sub>) of **3h**

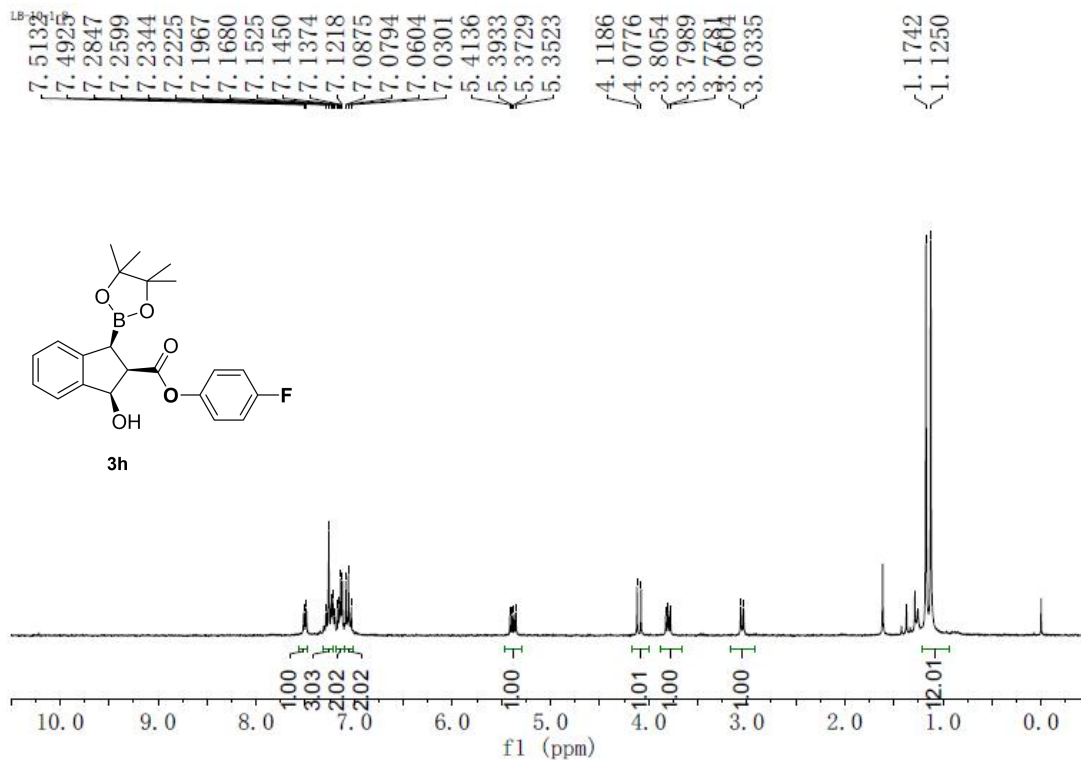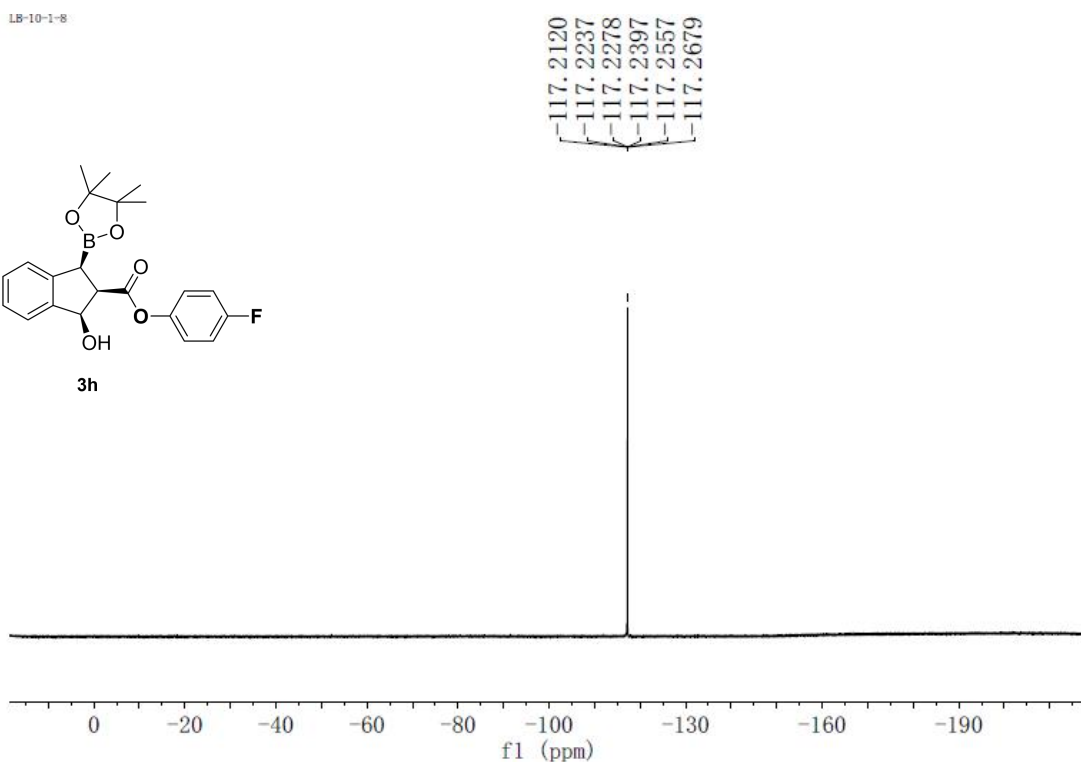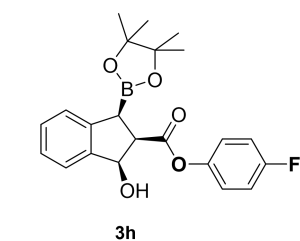

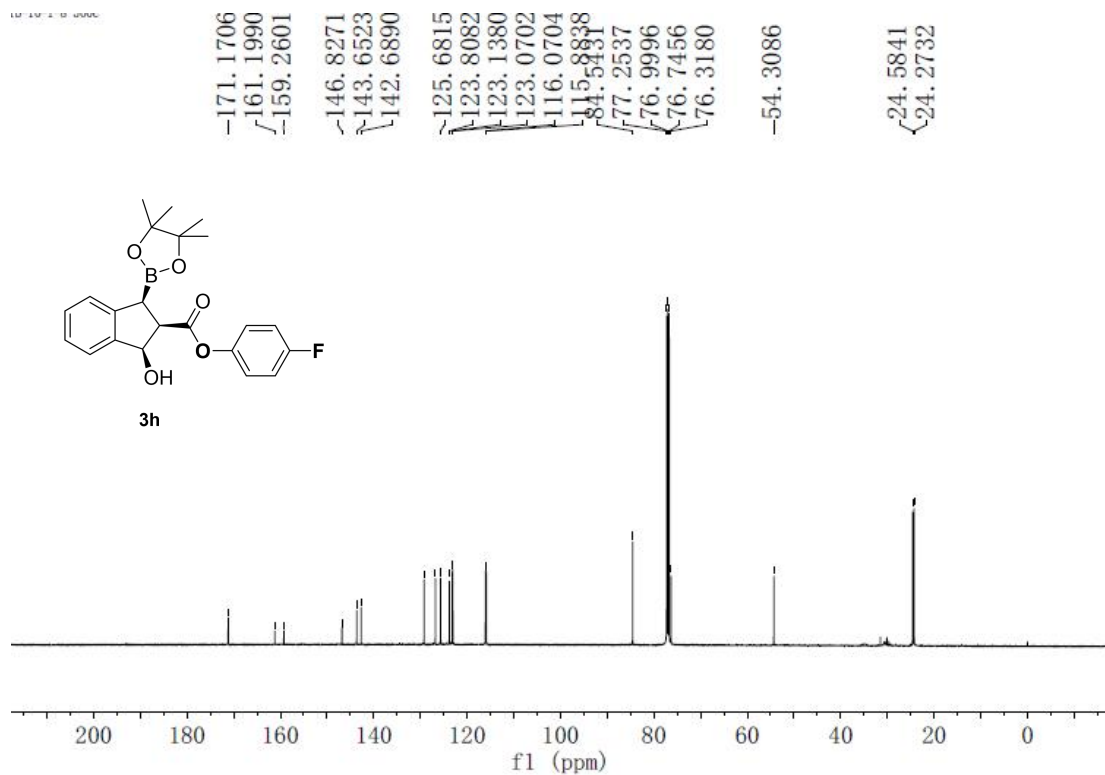

$^1\text{H}$  NMR (300 MHz,  $\text{CDCl}_3$ ),  $^{19}\text{F}$  NMR (282 MHz,  $\text{CDCl}_3$ ) and  $^{13}\text{C}$  NMR (126 MHz,  $\text{CDCl}_3$ ) of **3i**

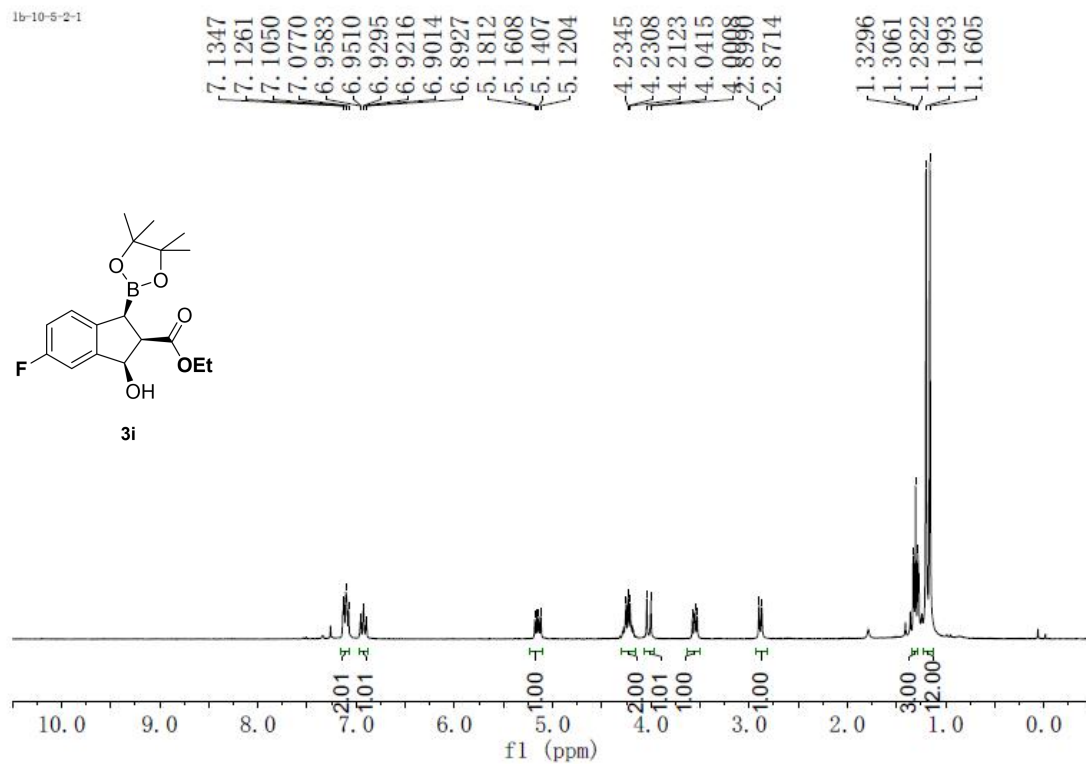



1b-10-5-2-1

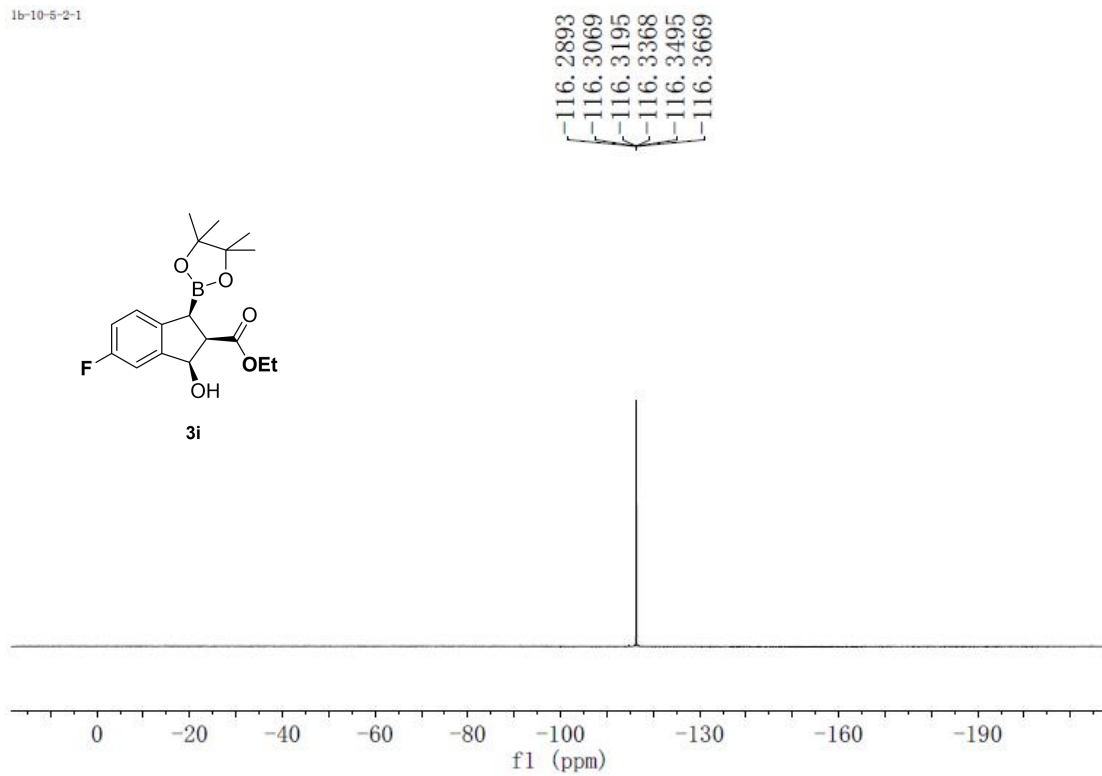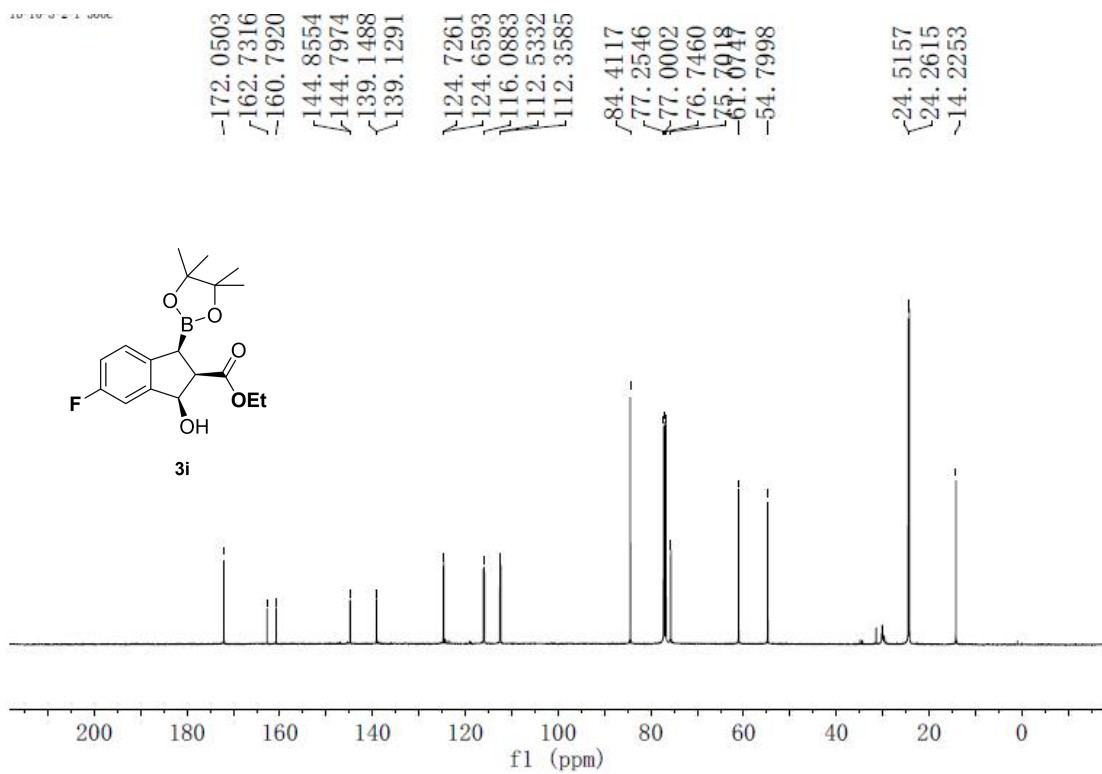

**<sup>1</sup>H NMR** (300 MHz, CDCl<sub>3</sub>), **<sup>19</sup>F NMR** (282 MHz, CDCl<sub>3</sub>) and **<sup>13</sup>C NMR** (126 MHz, CDCl<sub>3</sub>) of **3j**

1b-10-5-3-1

7.3988, 7.3798, 7.3663, 6.8899, 6.8656, 6.8426, 5.1720, 5.1569, 5.1427, 5.1278, 4.2558, 4.2376, 4.2197, 3.9277, 3.5306, 3.5101, 2.9101, 1.3263, 1.3091, 1.2913, 1.2132, 1.1739

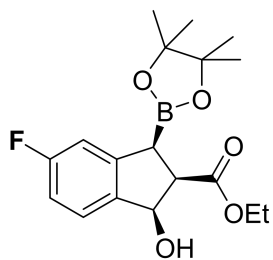

**3j**

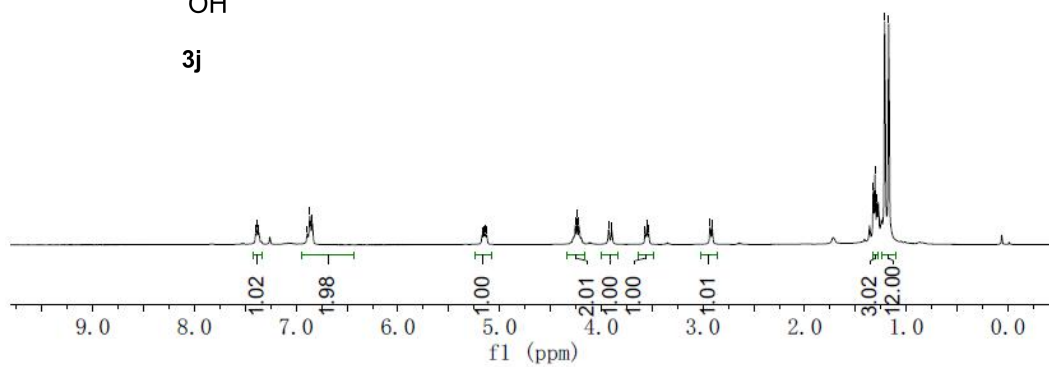

1b-10-5-3-1

--113.1719

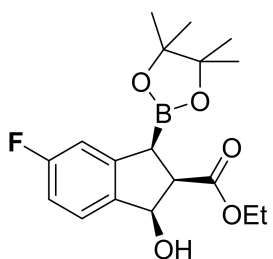

**3j**

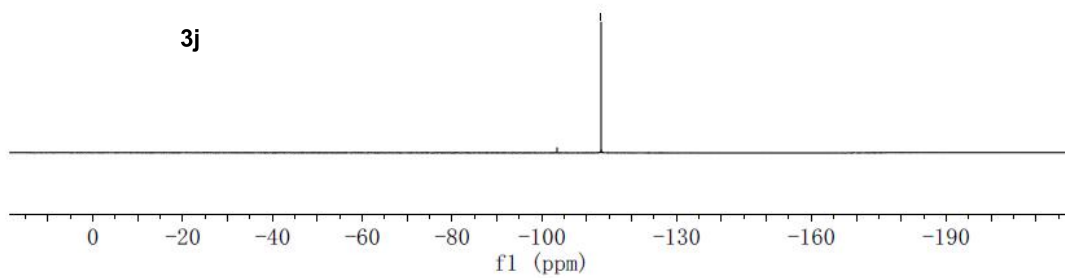

1b-10-5-3-1 500c

~172.1483  
~164.4721  
~162.5139

-146.4366  
-138.8718

126.8955  
126.8240  
113.7627

113.5848  
110.7168  
110.5363

84.5088  
77.2540  
76.9998  
76.7458  
75.1556

-61.1304  
-54.8933

24.5789  
24.3215  
~14.2509

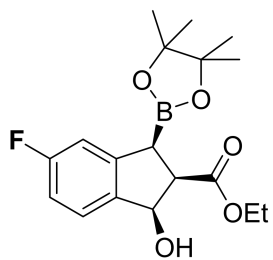

3j

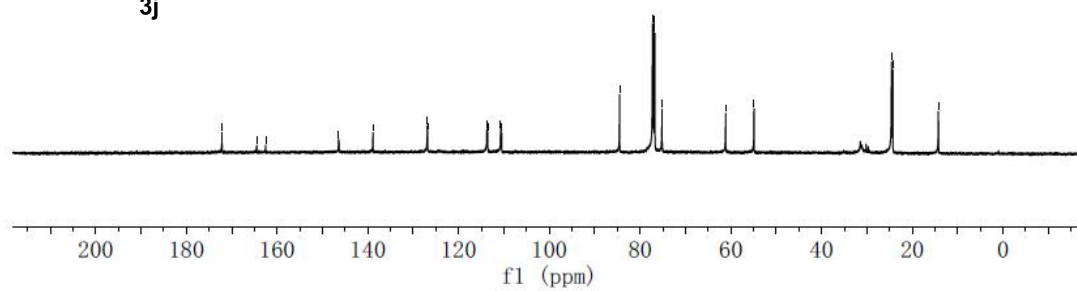

**<sup>1</sup>H NMR (300 MHz, CDCl<sub>3</sub>) and <sup>13</sup>C NMR (126 MHz, CDCl<sub>3</sub>) of 3k**

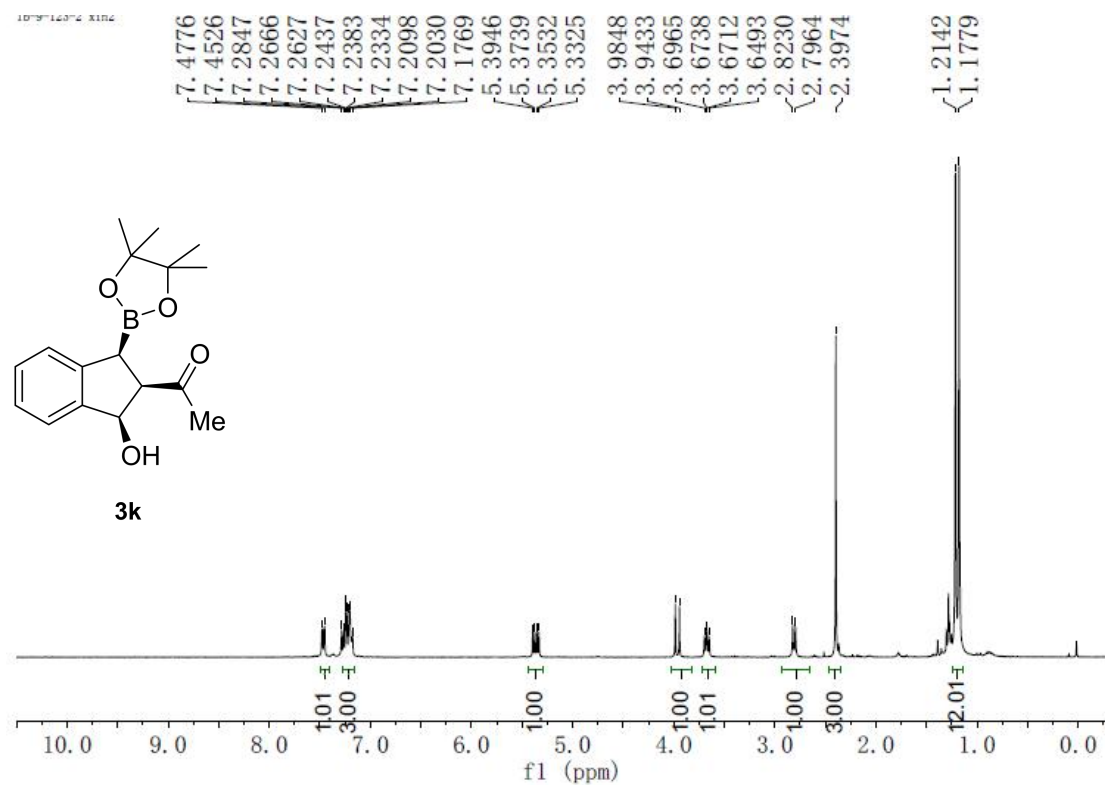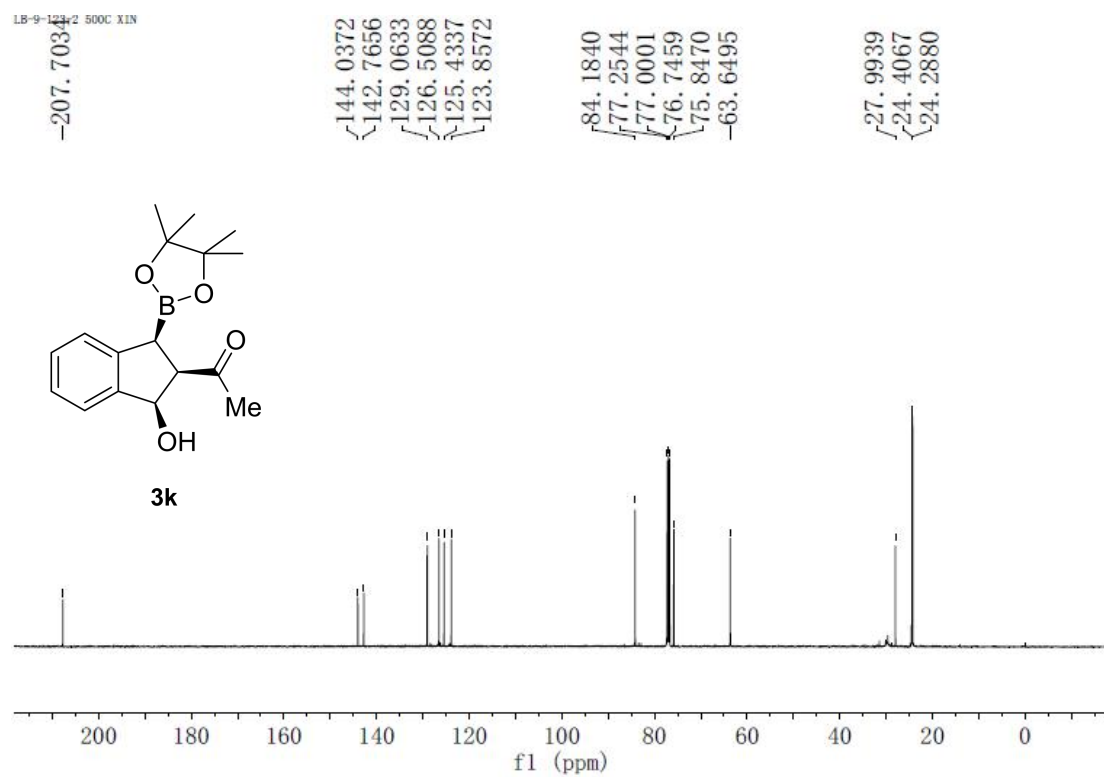



**<sup>1</sup>H NMR (300 MHz, CDCl<sub>3</sub>) and <sup>13</sup>C NMR (126 MHz, CDCl<sub>3</sub>) of 3m**

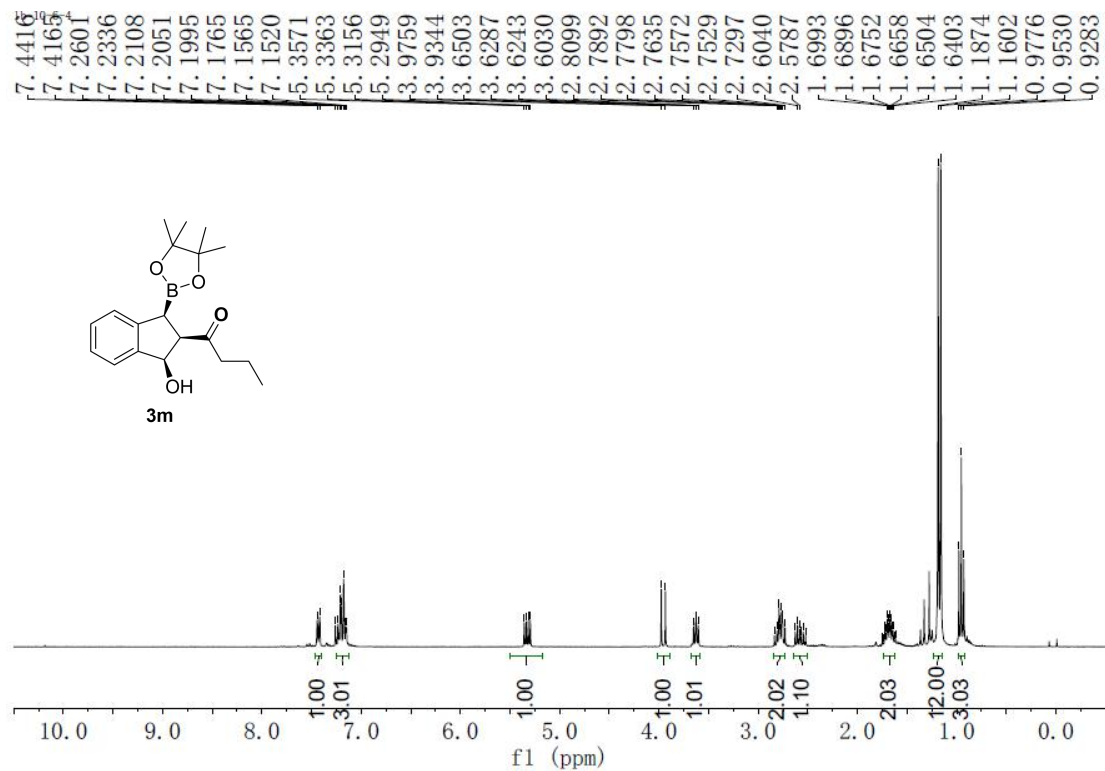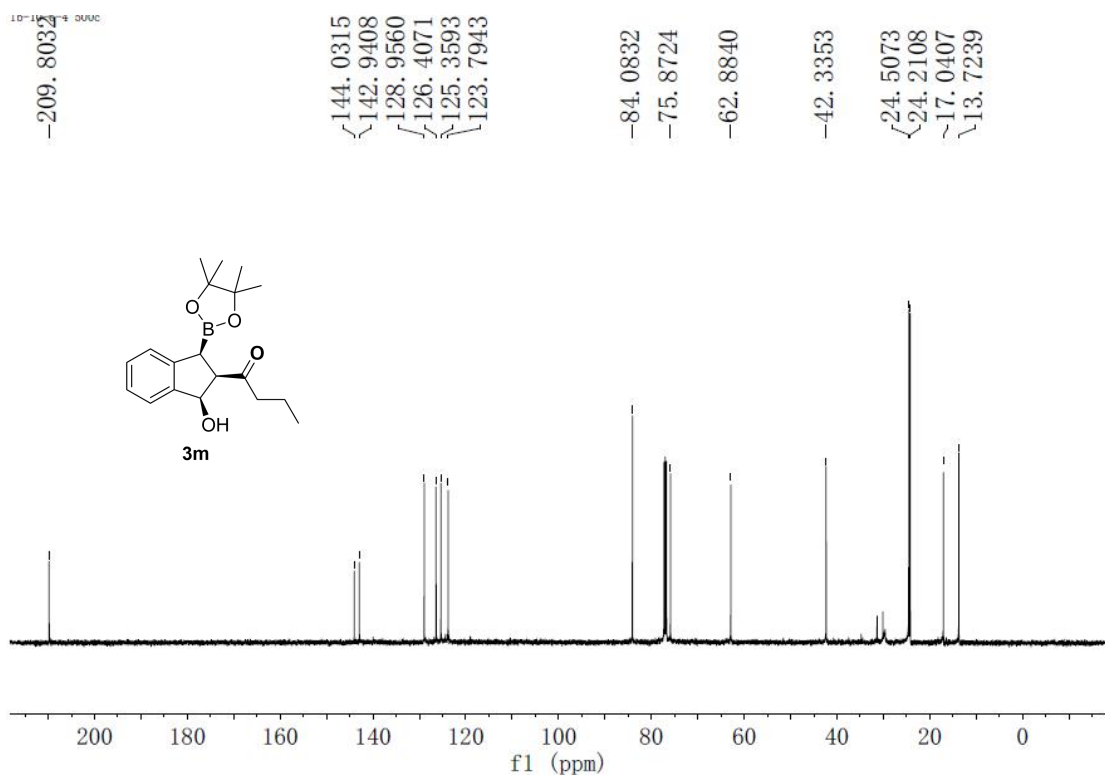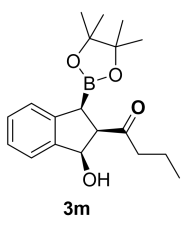

**<sup>1</sup>H NMR (300 MHz, CDCl<sub>3</sub>) and <sup>13</sup>C NMR (126 MHz, CDCl<sub>3</sub>) of 3n**

7.424  
7.409  
7.295  
7.2168  
7.2149  
7.2024  
7.2000  
7.1813  
7.1668  
7.1596  
7.1447  
5.3298  
5.3174  
5.3051  
5.2926  
3.9674  
3.9425  
3.6337  
3.6203  
3.6054  
2.7879  
2.7714  
2.7548  
2.7409  
2.6131  
2.6005  
2.5963  
2.5835  
1.6654  
1.6516  
1.6377  
1.6208  
1.3184  
1.3108  
1.3042  
1.1797  
1.1512  
0.8960  
0.8821  
0.8680

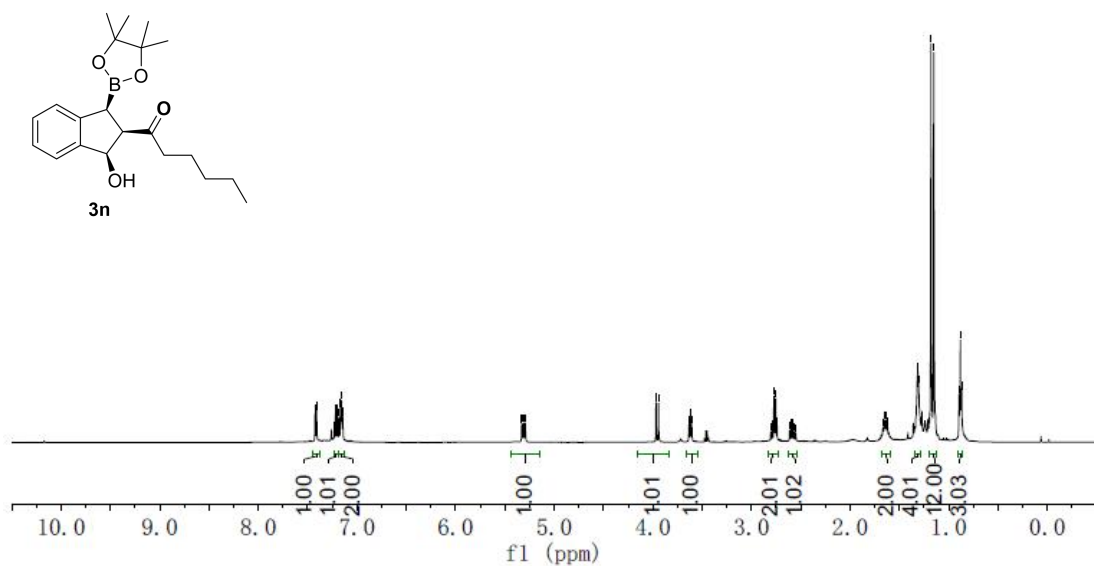

1b-10126-3-1 500c

-209.937  
143.9933  
142.8837  
128.9207  
126.3720  
125.3266  
123.7542  
84.0475  
77.2548  
77.0003  
76.7458  
75.8394  
62.8227  
40.3977  
31.3465  
24.4710  
24.1821  
23.2644  
22.3840  
13.8700

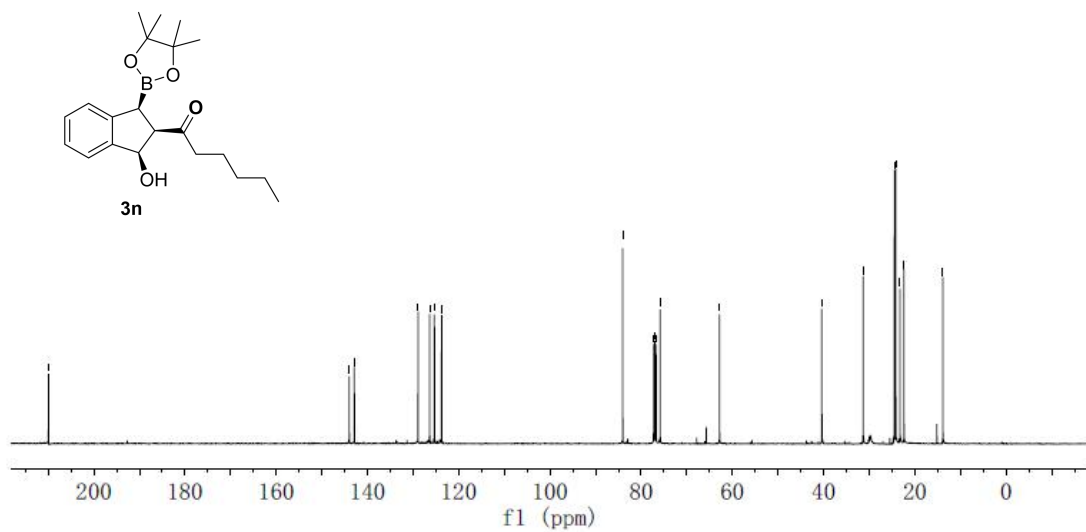

**<sup>1</sup>H NMR (300 MHz, CDCl<sub>3</sub>) and <sup>13</sup>C NMR (126 MHz, CDCl<sub>3</sub>) of **3o****

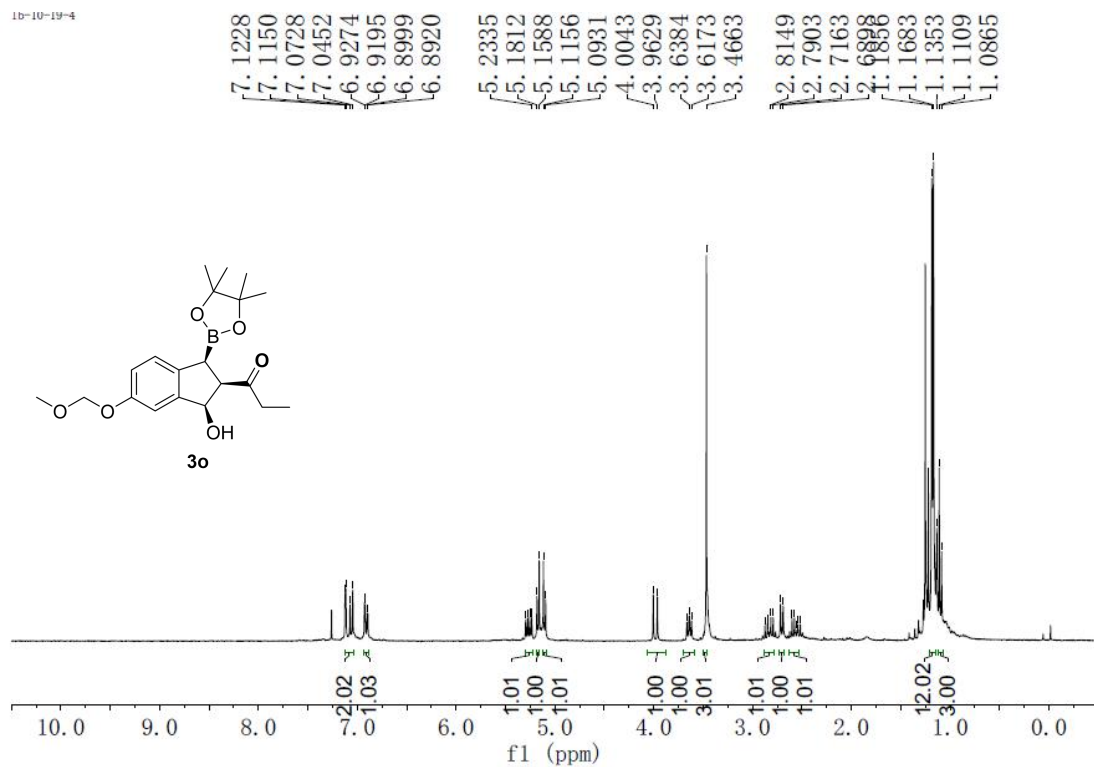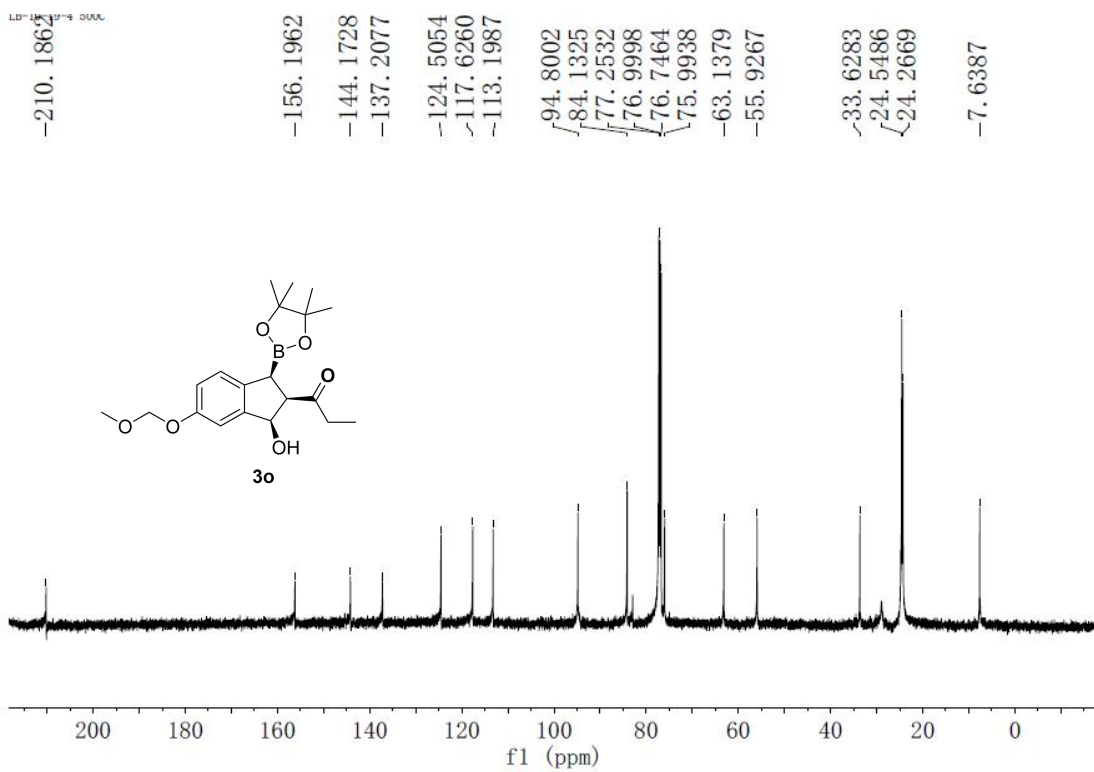



<sup>1</sup>H NMR (300 MHz, CDCl<sub>3</sub>) and <sup>13</sup>C NMR (126 MHz, CDCl<sub>3</sub>) of **3p**

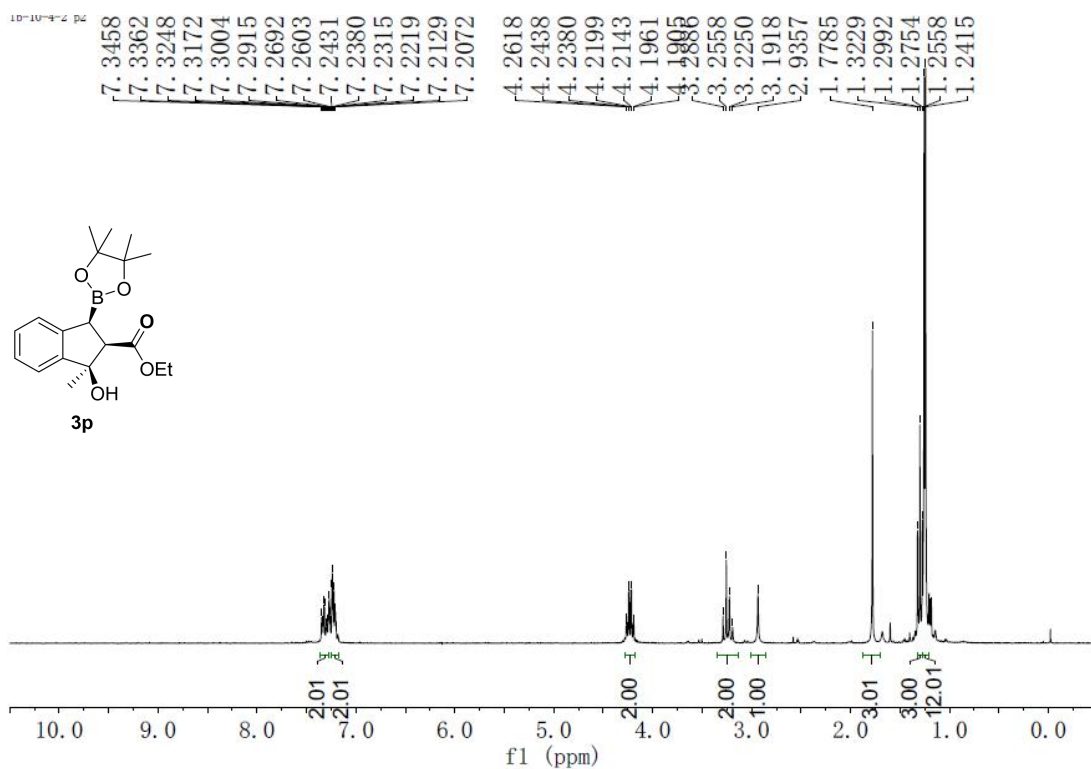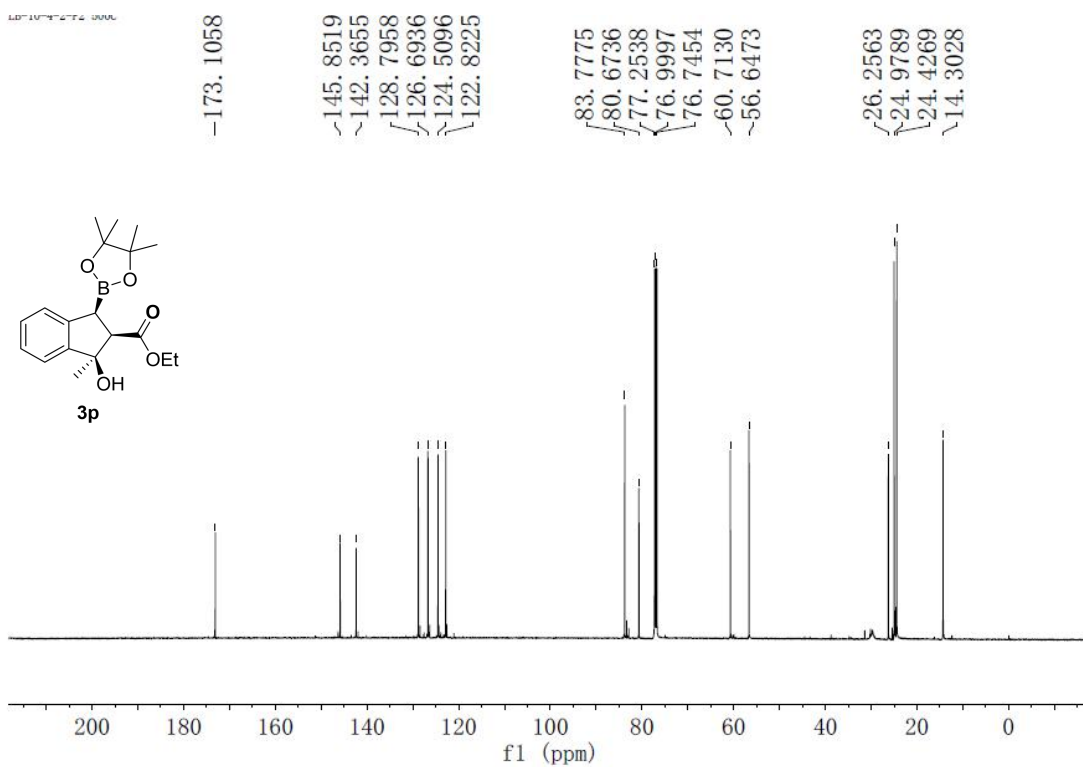

<sup>1</sup>H NMR (300 MHz, CDCl<sub>3</sub>) and <sup>13</sup>C NMR (126 MHz, CDCl<sub>3</sub>) of **3q**

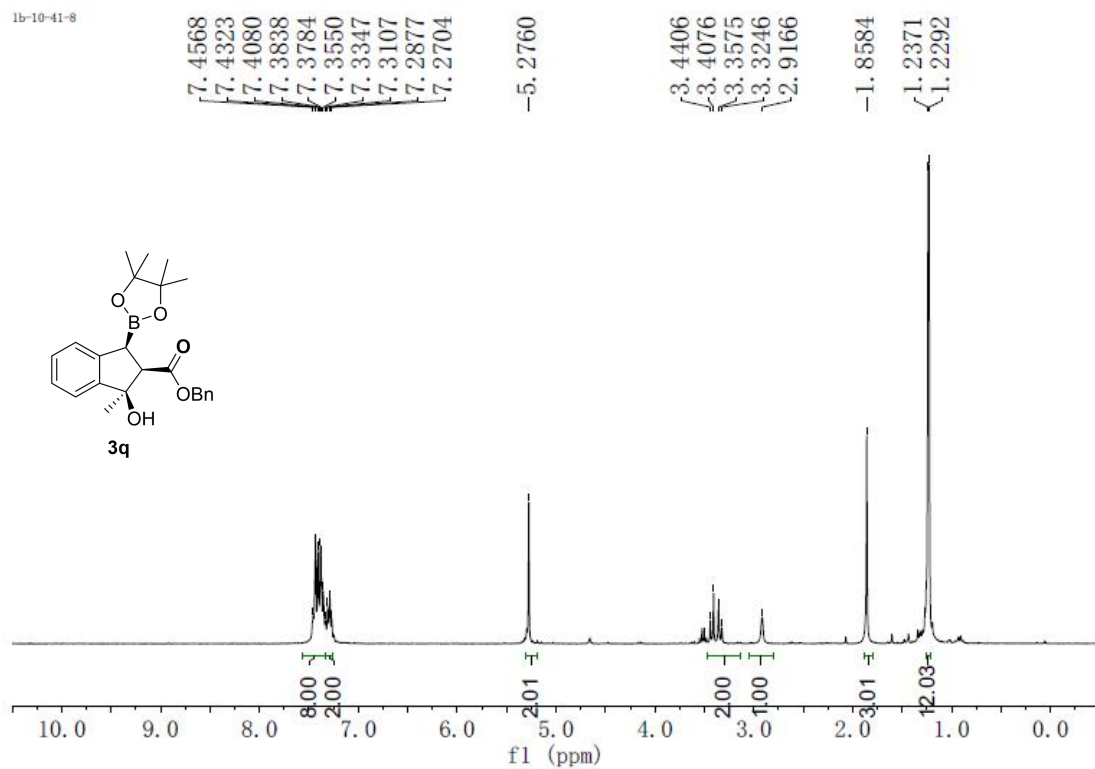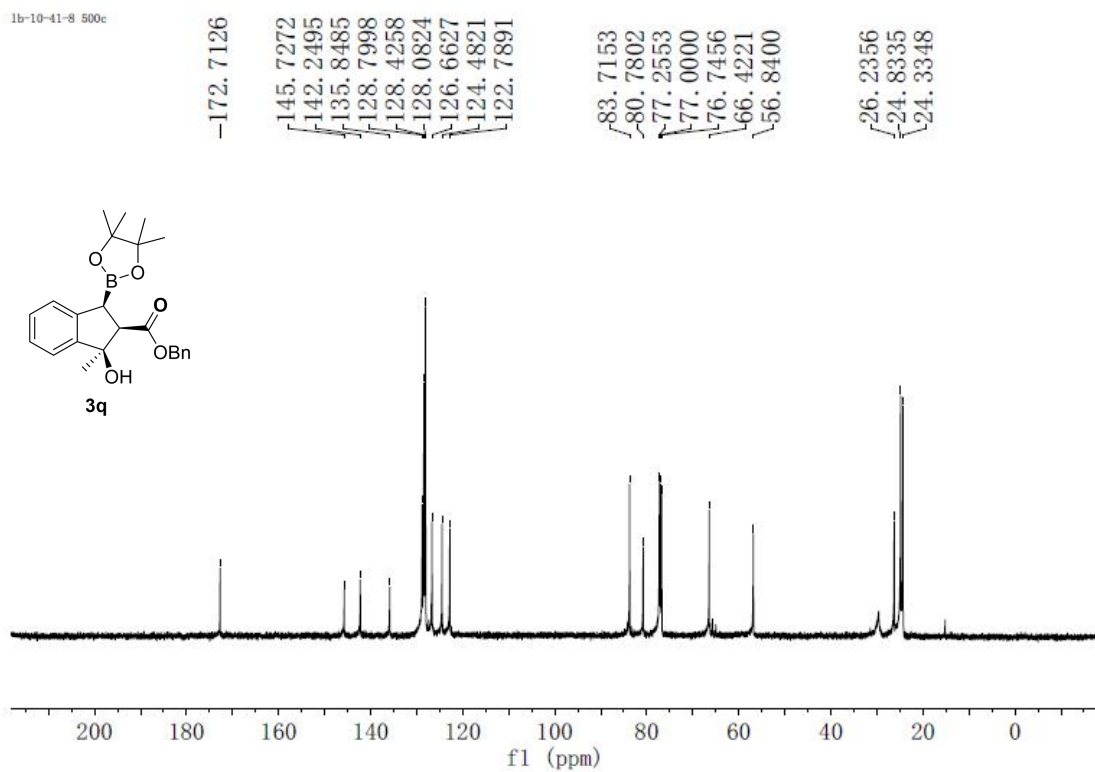

**<sup>1</sup>H NMR (300 MHz, CDCl<sub>3</sub>) and <sup>13</sup>C NMR (126 MHz, CDCl<sub>3</sub>) of 3r**

1b-10-19-2

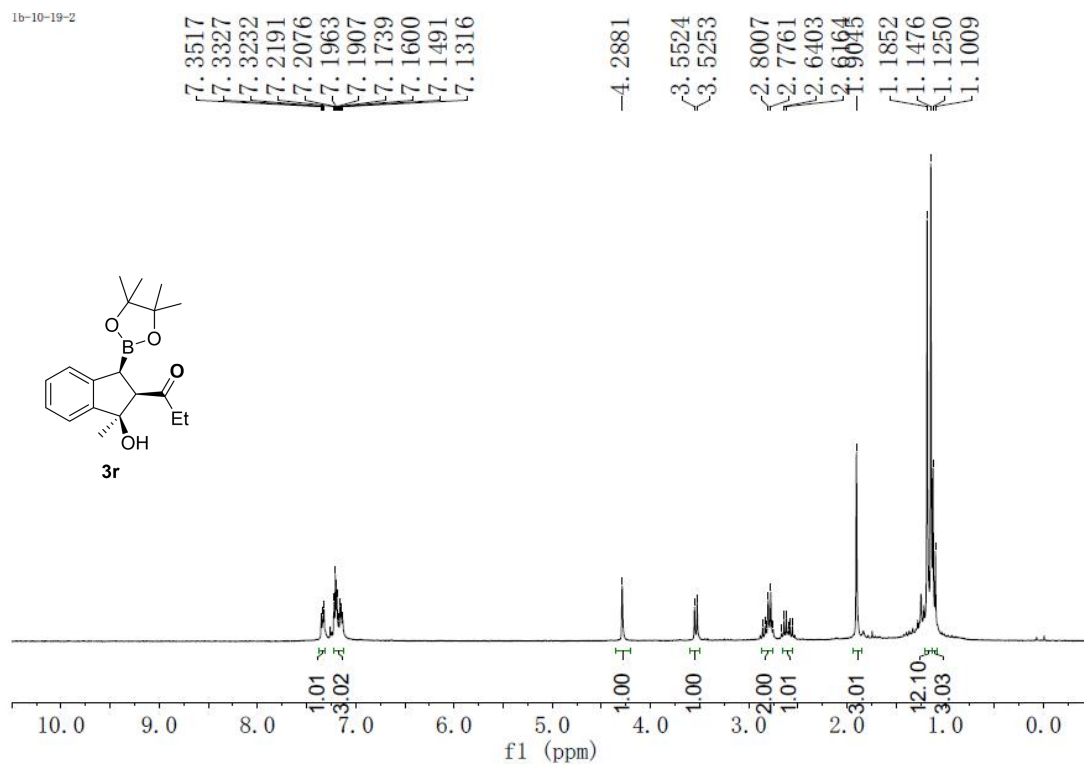

1b-10-19-2: 500C

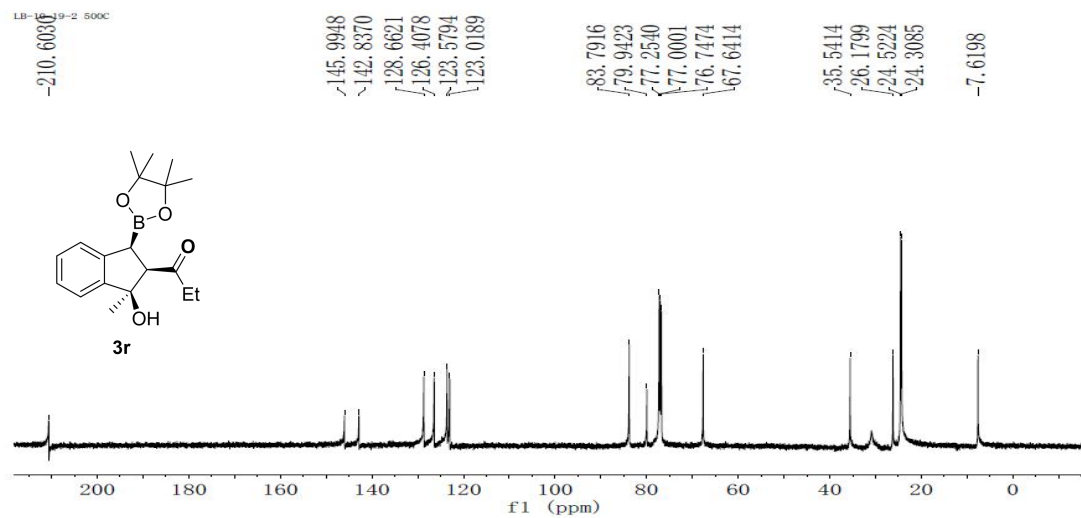



<sup>1</sup>H NMR (300 MHz, CDCl<sub>3</sub>) and <sup>13</sup>C NMR (126 MHz, CDCl<sub>3</sub>) of **3t**

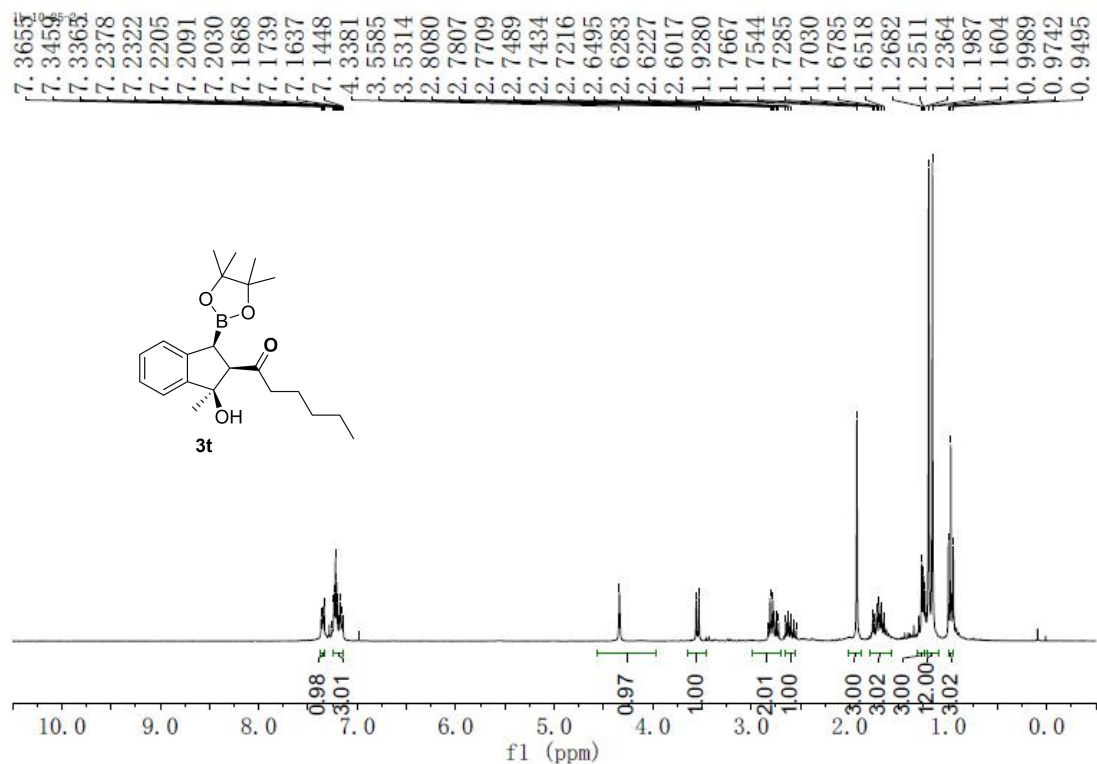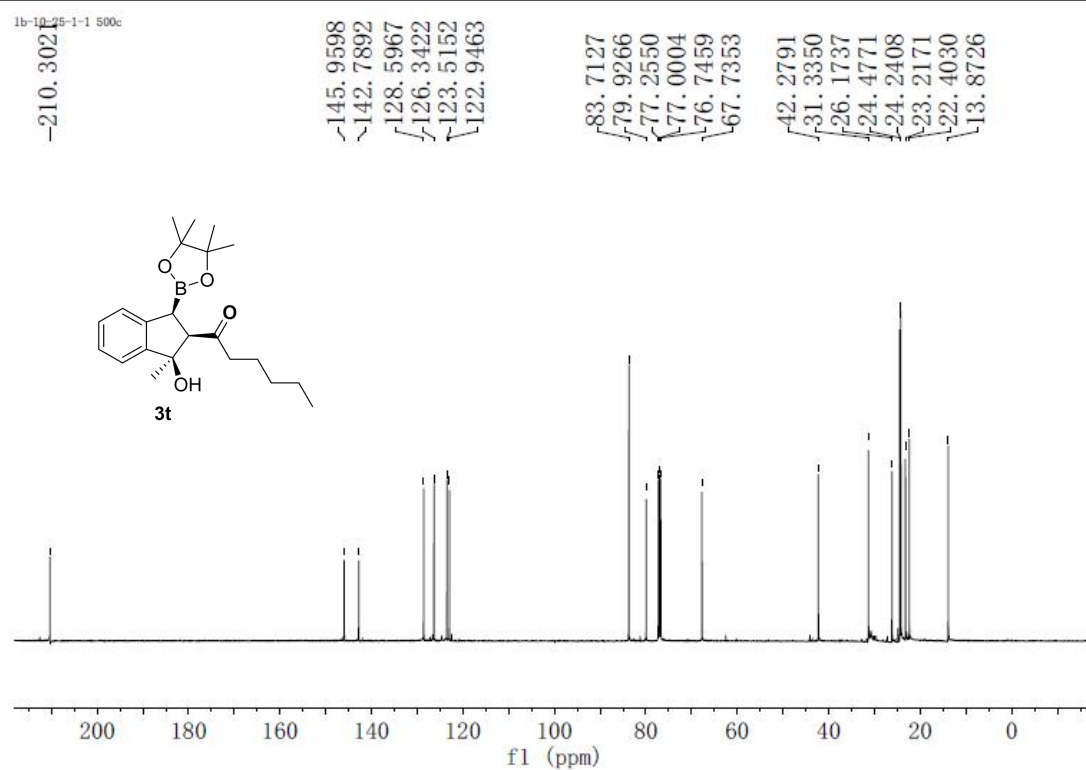

**<sup>1</sup>H NMR (300 MHz, CDCl<sub>3</sub>) and <sup>13</sup>C NMR (126 MHz, CDCl<sub>3</sub>) of **3u****

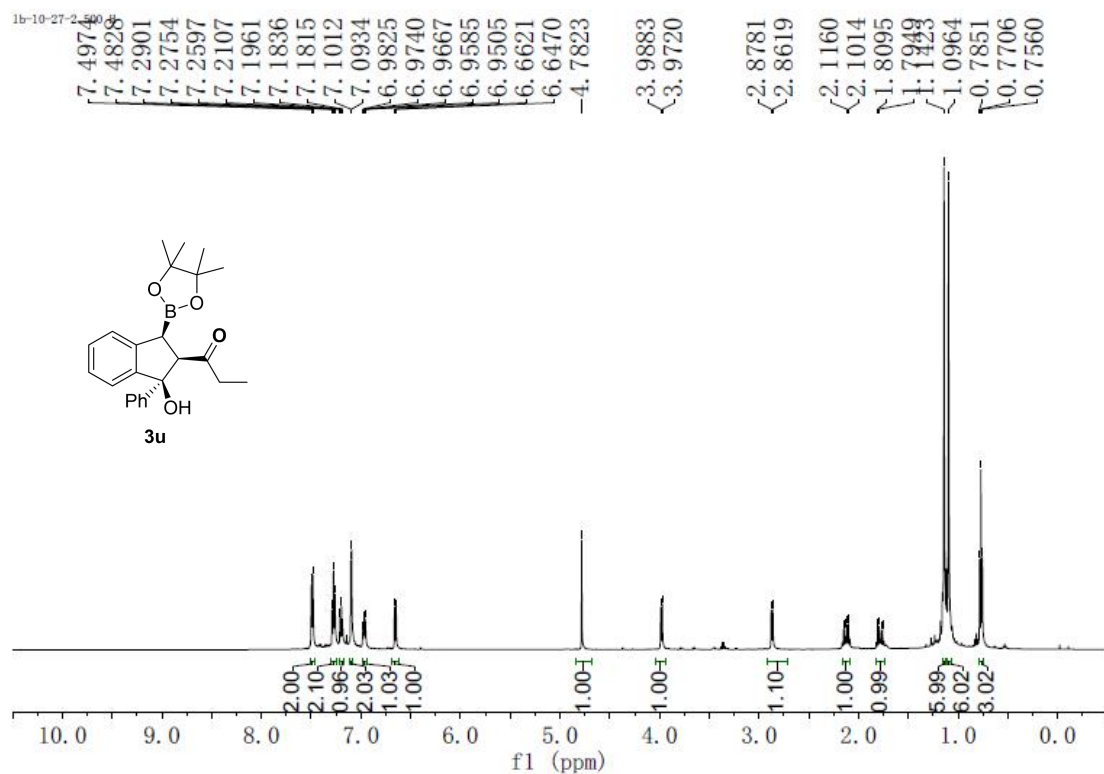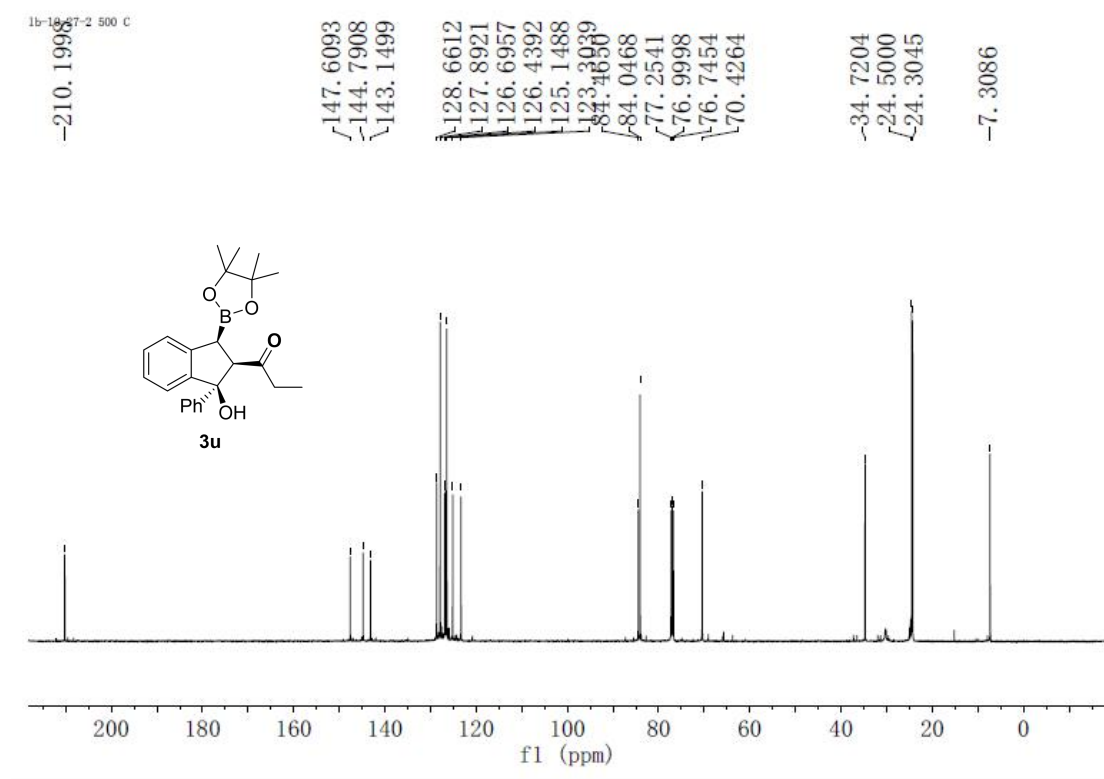

**<sup>1</sup>H NMR (300 MHz, CDCl<sub>3</sub>) and <sup>13</sup>C NMR (126 MHz, CDCl<sub>3</sub>) of 3v**

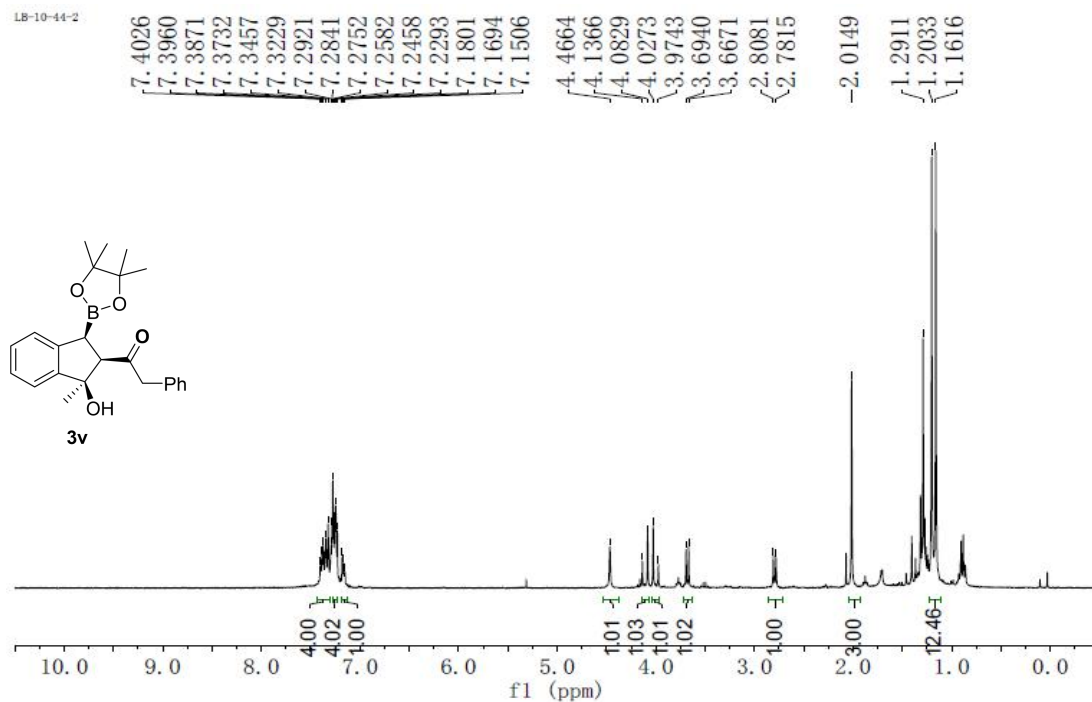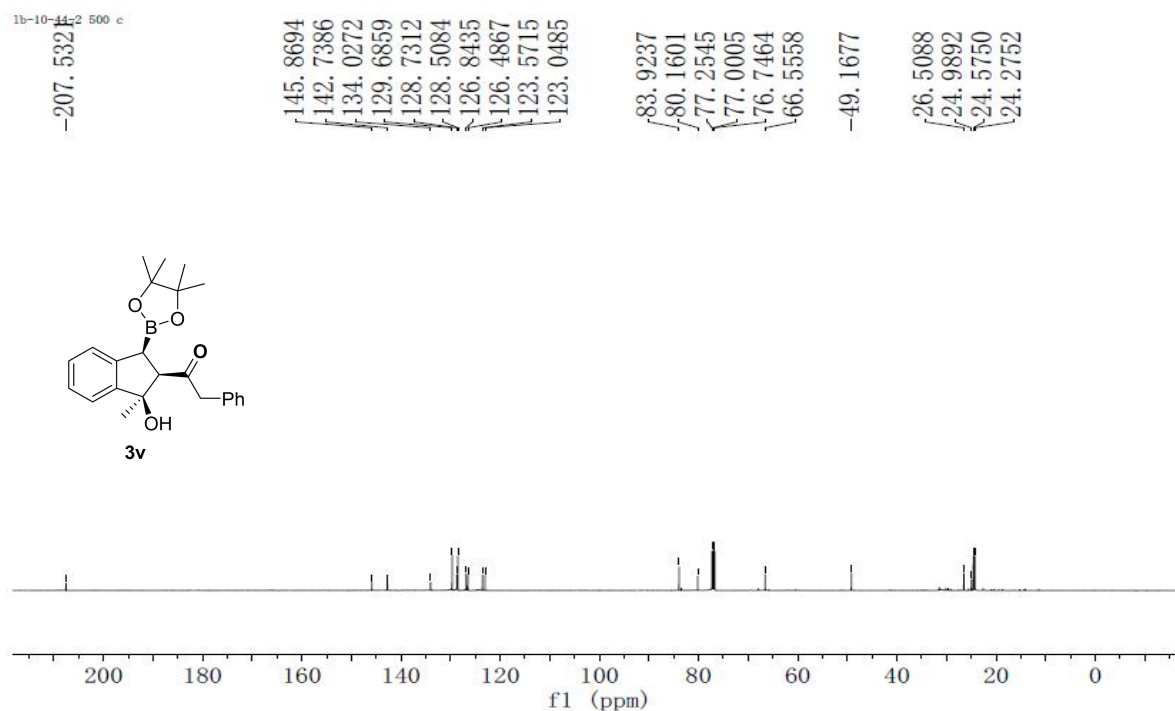

**<sup>1</sup>H NMR (300 MHz, CDCl<sub>3</sub>) and <sup>13</sup>C NMR (126 MHz, CDCl<sub>3</sub>) of 5**

7.2919  
7.2839  
7.2638  
7.2417  
7.2341  
7.1815  
7.1705  
7.1569  
7.1455  
7.1286  
6.6231  
6.5936  
5.3760  
5.3398  
5.3183  
5.2780  
4.0276  
4.0158  
4.0039  
3.9920  
3.9807  
3.9683  
3.9445  
3.8633  
3.8397  
3.8159  
3.8040  
3.7919  
3.7799  
3.7569  
3.7505  
3.7287  
2.9969  
2.9684  
1.3063  
1.2593  
1.0868  
1.0630  
1.0393

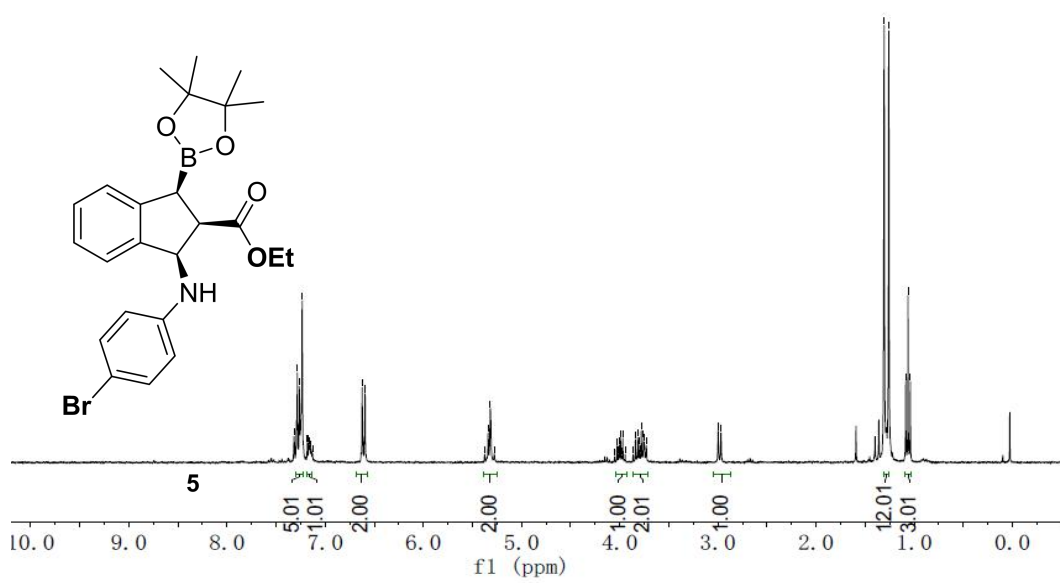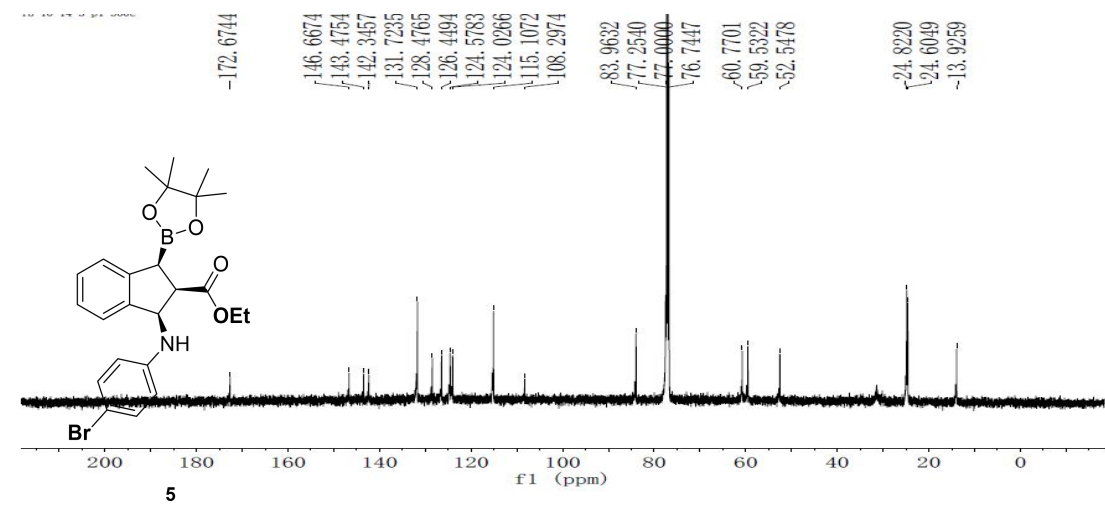



<sup>1</sup>H NMR (300 MHz, CDCl<sub>3</sub>) and <sup>13</sup>C NMR (126 MHz, CDCl<sub>3</sub>) of **7**

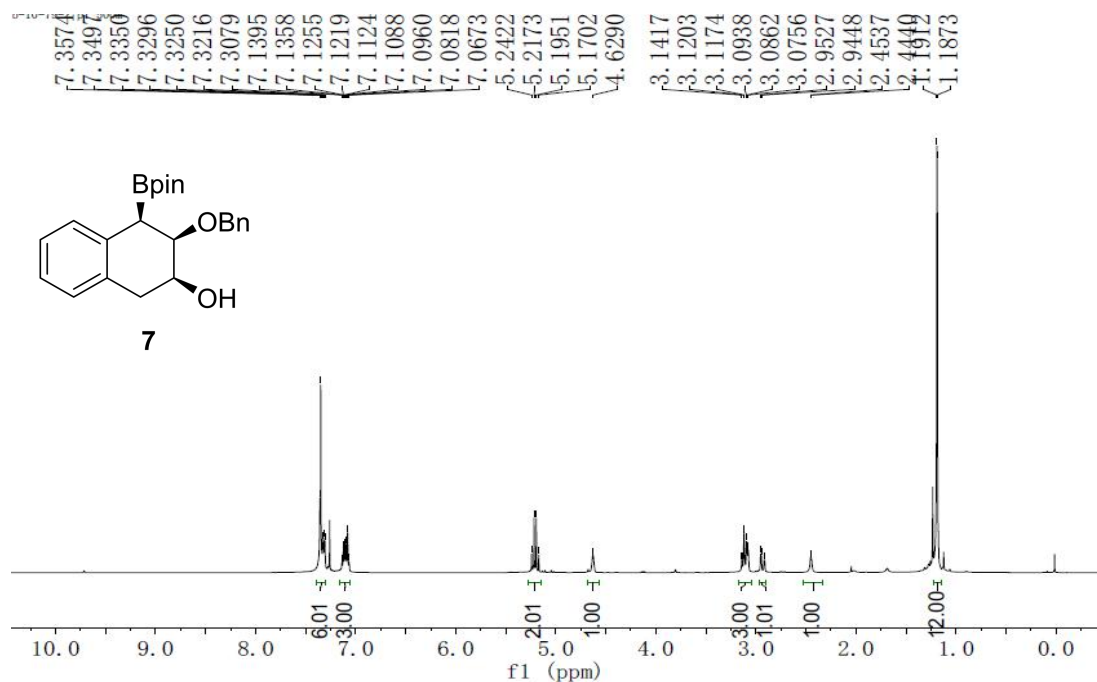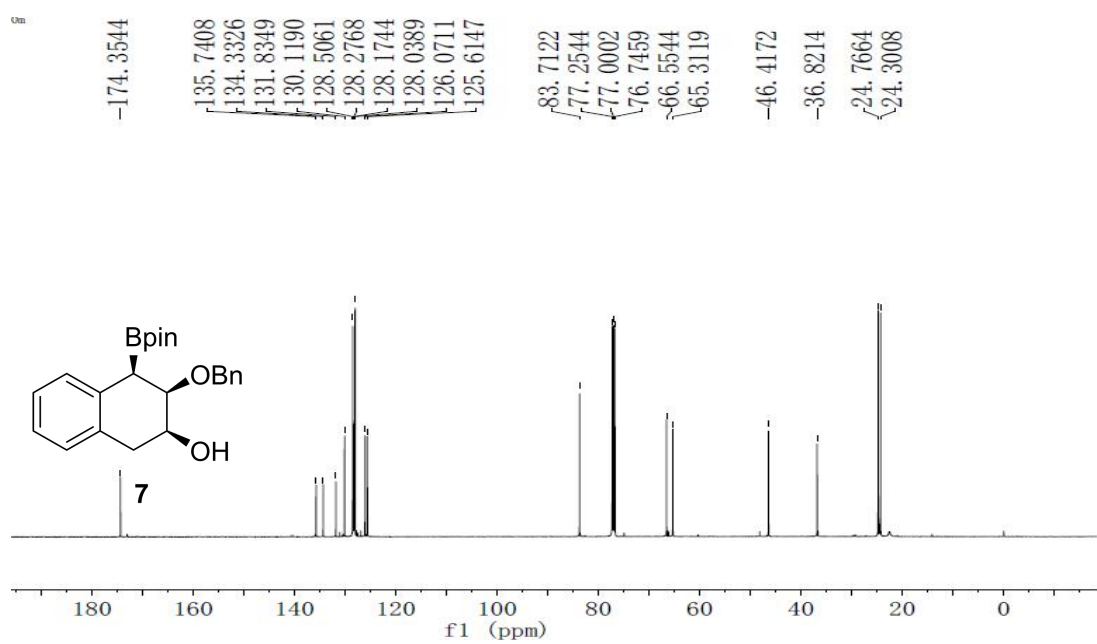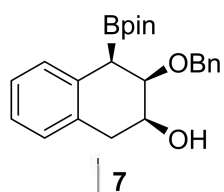

**<sup>1</sup>H NMR (300 MHz, CDCl<sub>3</sub>) and <sup>13</sup>C NMR (126 MHz, CDCl<sub>3</sub>) of **9****

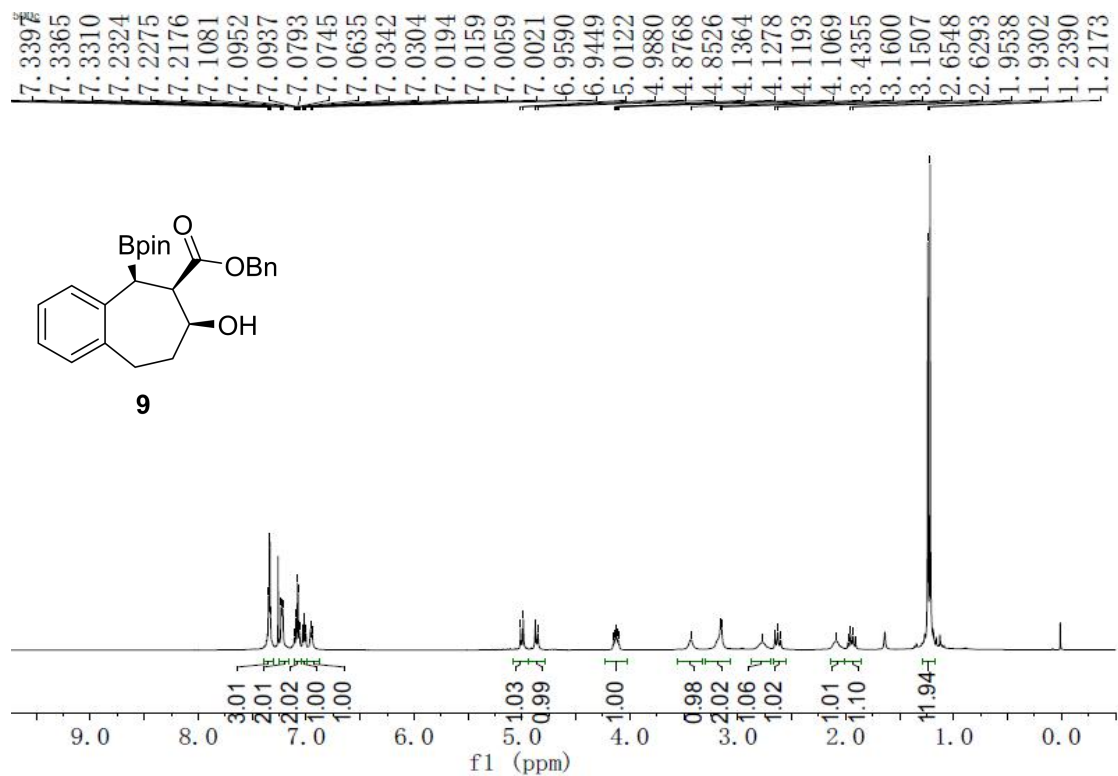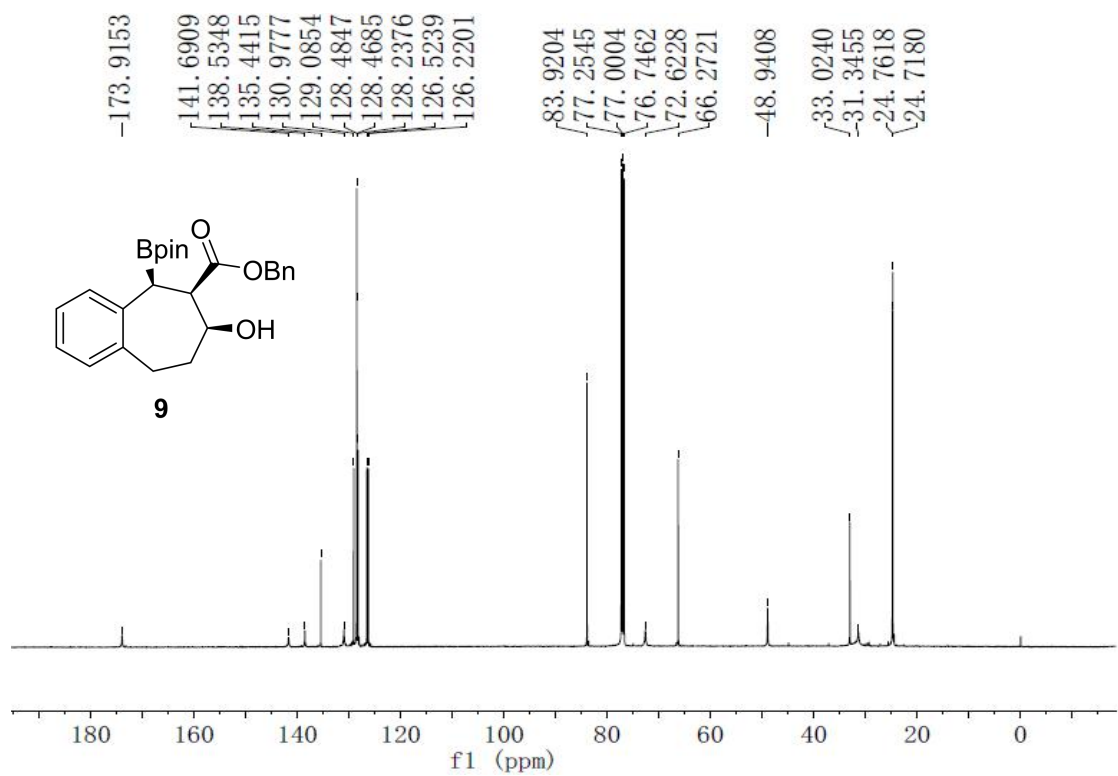

Supplement: d0qo00654h1.pdf [file d0qo00654h1.pdf]
